# Supplementary material for: Impact of RNase E and RNase J on Global mRNA Metabolism in the Cyanobacterium Synechocystis PCC6803
Source: PubMed Central journal article supplement (PMC7283877; doi:10.3389/fmicb.2020.01055), 2020-06-03
Supplement: Data_Sheet_1.pdf [file Data_Sheet_1.pdf]

|                      |     |                                                                        |                                              |                                      |                   |
|----------------------|-----|------------------------------------------------------------------------|----------------------------------------------|--------------------------------------|-------------------|
| SyRNaseE             | 331 | NIGGVIIIDFIDMDSHKDQLQLLEHFNRCL                                         | ETDKAR                                       | PQIAQLTELGLVELTRKRQGNLYELFGQPCPEC    | 400               |
| EcRNaseE             | 338 | DLGGLIVIDFIDMTPVRHQRAVENRLREAVRQDRARIQISHISRFGLLEMSRQRLSPSLGESSHHVCPRC |                                              |                                      | 407               |
| EcRNaseG             | 339 | NLGGIIIDFIDMNNEDHRRRVLHLSLEQALS                                        | KDRVK                                        | TSVNGFSALGLVEMTRKRRTRESIEHVL         | CNECPTC 408       |
| 2bx2.pdb_chainL_s001 | 328 | DLGGLIVIDFIDMTPVRHQRAVENRLREAVRQDRARIQISHISRFGLLEMSRQRLSPSLGESSHHVCPRC |                                              |                                      | 397               |
| Consensus aa:        |     | sLGGILIDFIDM                                                           | ss.ccp..lbpphpptlppD+h+.pls.ho.hGLLEhoRpR... | sl.c...p.CPpC                        |                   |
| Consensus ss:        |     | eeeee                                                                  | hhhhhhhhhhhhhhhh                             | eee                                  | eeeeee hhhh       |
| <hr/>                |     |                                                                        |                                              |                                      |                   |
| SyRNaseE             | 401 | GGLGHLVELPGEKGFVLSPTAVNSSIPPRLVEKPILSPPVAKVNDLP                        | -----                                        | KKEEAKISSPLDL                        | 461               |
| EcRNaseE             | 408 | SGTGTVRDNESLSLSILRLIEEEALKENTQEVHAI                                    | VPVPIASYLLNEKRS                              | SAVNAIETRQDGVRCVIVPND                | 477               |
| EcRNaseG             | 409 | HGRGTVKTVETVCYEIMREIVRVHHAYDSDRFLVYASPAVAEALKGEE                       | SHSLAEVE-IFV                                 | GKQVKVQIEP                           | 477               |
| 2bx2.pdb_chainL_s001 | 398 | SGTGTVRDNESLSLSILRLIEEEALKENTQEVHAI                                    | VPVPIASYLLNEKRS                              | SAVNAIETRQDGVRCVIVPND                | 467               |
| Consensus aa:        |     | .G.Ghl.p.s...l.....bssp.h...h.ss.h..l.sb.....b...ph...p.               |                                              |                                      |                   |
| Consensus ss:        |     | eeeeehhhhhhhhhhhhhhhhh                                                 | eeeeee                                       | hhhhhhh                              | hhhhhhh hh eeeeee |
| <hr/>                |     |                                                                        |                                              |                                      |                   |
| Zn Link              |     |                                                                        |                                              |                                      |                   |
| SyRNaseE             | 462 | LF-HPNYQEQGDRD                                                         | -----                                        | -----                                | 474               |
| EcRNaseE             | 478 | QMETPHYHVLVRVRKGEETPTLSYMLPKLHEEAM                                     | ALPSEEEFAERKRPEQ                             | PALATFAMPDVPPAPTPAEPA                | 547               |
| EcRNaseG             | 478 | LYNQEQFDVVM                                                            | -----                                        | -----                                | 489               |
| 2bx2.pdb_chainL_s001 | 468 | QMETPHYHVLVRVRKGEETPTLSYMLPKLHEEAM                                     | -----                                        | -----                                | 500               |
| Consensus aa:        |     | bh.p.p@p.....                                                          |                                              |                                      |                   |
| Consensus ss:        |     | eeeee                                                                  |                                              |                                      |                   |
| <hr/>                |     |                                                                        |                                              |                                      |                   |
| C1                   |     |                                                                        |                                              |                                      |                   |
| SyRNaseE             | 475 | -----                                                                  | -----                                        | -----SNRR-----                       | 478               |
| EcRNaseE             | 548 | APVVAPAPKAAPATPAAPAQPGLLSRFFGALKALFSGGEETKPTEQPAPKAEA                  | KPERQ                                        | DRRKPRQNNRR                          | 617               |
| EcRNaseG             |     | -----                                                                  | -----                                        | -----                                |                   |
| 2bx2.pdb_chainL_s001 |     | -----                                                                  | -----                                        | -----                                |                   |
| Consensus aa:        |     | .....                                                                  |                                              |                                      |                   |
| Consensus ss:        |     |                                                                        |                                              | hhh                                  |                   |
| <hr/>                |     |                                                                        |                                              |                                      |                   |
| SyRNaseE             | 479 | -----                                                                  | RRRRRGSEFS                                   | EKENIKSVGISRSKGPSPTKEKVTGTAPPRRERPSR | 526               |
| EcRNaseE             | 618 | DRNERDTRSERTEGSDNREENRRNRRAQQQTAE                                      | TRESRQAE                                     | ----VTEKARTADEQQAPRRERSRR            | 682               |
| EcRNaseG             |     | -----                                                                  | -----                                        | -----                                |                   |
| 2bx2.pdb_chainL_s001 |     | -----                                                                  | -----                                        | -----                                |                   |
| Consensus aa:        |     | .....                                                                  |                                              |                                      |                   |
| Consensus ss:        |     |                                                                        | hhhhh                                        |                                      |                   |
| <hr/>                |     |                                                                        |                                              |                                      |                   |
| C2                   |     |                                                                        |                                              |                                      |                   |
| SyRNaseE             | 527 | RVEKTLVPVDVAMTTLEQDIYARMGISPLIKTEYADQDPRSFMVSVVTAG                     | AALEGNTNGSGSLVNAVITT                         |                                      | 596               |
| EcRNaseE             | 683 | RNDDKRQAQQEAKALNVE                                                     | -----EQSVQETEQEER                            | -----VRPVQPRRKQRQLNQKVRYEQSV         | 736               |
| EcRNaseG             |     | -----                                                                  | -----                                        | -----                                |                   |
| 2bx2.pdb_chainL_s001 |     | -----                                                                  | -----                                        | -----                                |                   |
| Consensus aa:        |     | .....                                                                  |                                              |                                      |                   |
| Consensus ss:        |     |                                                                        |                                              |                                      |                   |

C3

SyRNaseE 597 VDNGDNGDNVPSDGLTIVSEVTAPTIVIEQPREETVEPEQVVLPLQLDDETPAAPVAEESAPIETKKRP-- 664  
 EcRNaseE 737 **EEAVVAPVVEETVAA**--EPIVQEAPAPRTELVKVPLP**VVAQTAP****PEQQEENNADNRD**NGGMPPRRSRRSPRH 804  
 EcRNaseG -----  
 2bx2.pdb\_chainL\_s001 -----  
Consensus aa: .....  
Consensus ss: .....

SyRNaseE 665 ---**GRRRRRS**-----**SAE**----- 674  
 EcRNaseE 805 LRVSG**QRRRRRYRDER**YPTQSPMPL**TVACASPEL**ASGKVIWIRYPIVRPQDVQ**VEEQREQE**EVHVQPM**VT**EV 874  
 EcRNaseG -----  
 2bx2.pdb\_chainL\_s001 -----  
Consensus aa: .....  
Consensus ss:           hhh  
                   **C4**

SyRNaseE -----  
 EcRNaseE 875 **PVAAAIEPVVSA****PVVEEVAGVVE**APVQVAEPQPEVVETTHPE**VI**AAAVTEQ**QVI****TESDVAVAQEVAEQ**A 944  
 EcRNaseG -----  
 2bx2.pdb\_chainL\_s001 -----  
Consensus aa: .....  
Consensus ss: .....

SyRNaseE -----  
 EcRNaseE 945 EPVVEP**Q**EE**TADIEEVVETAEVVVAE**PEVVAQPA**PVVAEVA**AEVETVA**AVEPEVTVE**HNHATAPMTRAP 1014  
 EcRNaseG -----  
 2bx2.pdb\_chainL\_s001 -----  
Consensus aa: .....  
Consensus ss: .....

SyRNaseE -----  
 EcRNaseE 1015 APEYVPEAPRHSDWQRPTFAFEGKGAAGGHTATHHASAAPARPQV**E** 1061  
 EcRNaseG -----  
 2bx2.pdb\_chainL\_s001 -----  
Consensus aa: .....  
Consensus ss: .....

## B

SyRNaseJ -----  
 BsRNaseJ1 -----  
 BsRNaseJ2 -----  
 CrRNaseJ 1 MQGGQ**V**LAGVSPASTSPAP**AAQRARSL**STRN**VVA**QADNS**ERWR**TQGGRGGGGGGGGGGGGGGGGGGGG 70  
 rnj\_3BK1.pdb\_chainA\_s001 -----  
Consensus aa: .....  
Consensus ss: .....

|                          |     |                                                                          |     |
|--------------------------|-----|--------------------------------------------------------------------------|-----|
| SyRNaseJ                 | 1   | -----MAK-----NTQTQALKILPLGGLHEIGKNTCVFEYD                                | 31  |
| BsRNaseJ1                | 1   | -----MK-----FVKNDQTAVFALGGLGEIGKNTYAVQFQ                                 | 30  |
| BsRNaseJ2                | 1   | -----MK-----KKNTENVRIIALGGVGEIGKNLYVIEID                                 | 30  |
| CrRNaseJ                 | 71  | RRGKTYVSESGMTLKSYSVASDQQEHLGSAIQKRRYKFPFPPTNGGPPPLRILPIGGLGEIGMNCMLAGVG  | 140 |
| rnj_3BK1.pdb_chainA_s001 | 1   | -----GPQDHVEIIPLGGMGEIGKNITVFRFR                                         | 27  |
| <u>Consensus aa:</u>     |     | .....M.....s.s..lcIIsIGGLGEIGbhhhh.h.                                    |     |
| <u>Consensus ss:</u>     |     | eeeeee eeeeee                                                            |     |
| SyRNaseJ                 | 32  | DEILLDAGLAFPTDDMHGVNVVLPMTYLRENRKIKGMVVTGHGEDHIGGIAYHLKQFDI----PIIY      | 97  |
| BsRNaseJ1                | 31  | DEIVLIDAGIKFPEDELLGIDYVIPDYTYLVKNEDKIKGLFITGHGEDHIGGIYLLRQVN----IPVY     | 95  |
| BsRNaseJ2                | 31  | SDIFVVDAGLMHPENEMLGIDVVIPDISYLIERADRVKAIFLTGHGDENIIGGVFYLLNKLS----VPVY   | 95  |
| CrRNaseJ                 | 141 | DRYVVIDAGLMFPDFSDLGMQKILPDTDFLAQWKDRIEALIIITGHGEDHIGALPWVVPALD---PATPIY  | 207 |
| rnj_3BK1.pdb_chainA_s001 | 28  | DEIFVLDGGLAFPEEGMPGVLLIIPRVYLIHRHKIKAWVLTGHGEDHIGGLPFLLPMTFGKESPVPIY     | 97  |
| <u>Consensus aa:</u>     |     | DchhllDAGLhFP-.p.hGhp.llPDhs@Lhp.c-+IcthhlTHGHEDHIGtIs@ll..Is....hPIY    |     |
| <u>Consensus ss:</u>     |     | eeeeee hhhhhhhhhhhh eeeee hhhh hhhhhh eee                                |     |
|                          |     | M1 M2                                                                    |     |
| SyRNaseJ                 | 98  | GPRLAMALLRDKLEEAGMLE-RTNLQTVSPREMVRLGKSFVVEFIRNTHSIADSYCLAHTPLGVMHSG     | 166 |
| BsRNaseJ1                | 96  | GGKLAIGLLRNKLEEHGLLR-QTKLNIIGEDDIVKFR-KTAVSFFRTTHSIPDSYGIIVKTPPGNIVHTG   | 163 |
| BsRNaseJ2                | 96  | GTKLTLALLREKRLKQYGHNR-KTDLREIHSKSVITFE-STKVSFFRTIHSIPDSVGVSFKTLGSLGIVCTG | 163 |
| CrRNaseJ                 | 208 | ASSFVMQLVKRRLTEYNLWD-EKRFITFDMRQRFQAG-PFEIEPVRVTHSIPDCCGLIMRSDEGTIVHTG   | 275 |
| rnj_3BK1.pdb_chainA_s001 | 98  | GARLTLGLLRGKLEEFGLRPGAFNLKEISPDRIQVGRYFTLDFRMTHSIPDNSGVVIRTPIGTIVHTG     | 167 |
| <u>Consensus aa:</u>     |     | tsphhh.Ll+p+LpE@sh.c.ppph.phs.cp.hph..h.lp.hrhTHSIPDthGllh+osbGsIVHTG    |     |
| <u>Consensus ss:</u>     |     | hhhhhhhhhhhhh eeee eeee eeeeeee eeeeeeee eeeeeee                         |     |
|                          |     | M3                                                                       |     |
| SyRNaseJ                 | 167 | DFKIDHTPIDGEFFDLQKVAEYGEKGVLCLLSDSTNAEVPGITPSEASVIPNLDRVFSQA--EGRLMVT    | 234 |
| BsRNaseJ1                | 164 | DFKFDFTPV-GEPANLTKMAEIGKEGVLCLLSDSTNSENPEFTMSERRVGESIHDI FRKV--DGRIIFAT  | 230 |
| BsRNaseJ2                | 164 | DFKFDQTPALNQTCDIGEIAKIGNSGVLALLSDSANAERPGYTPSEAAVSGEISDALYNS--QNRVIIAV   | 231 |
| CrRNaseJ                 | 276 | DWKIDENPLDGEQFDRELFMALGSEPVALLMMSDSTNVLSPGRTLSEQVVHDSLVEKVKLEHNGRGRVICTQ | 345 |
| rnj_3BK1.pdb_chainA_s001 | 168 | DFKLDPTPIDGKVSHLAKVAQGAEGVLLLIADATNAERPGYTPSEMEIAKELDRVIGRA--PGRVFTT     | 235 |
| <u>Consensus aa:</u>     |     | D@Khd.sPl.Gc..bh.hGpcsVhhhhSDSTNhbPG.T.SE..V..plsc.h.ph..pGRlhhhp        |     |
| <u>Consensus ss:</u>     |     | hhhhhhh eeee hhhhhhhhhhhhhh eeeee                                        |     |
|                          |     | M4 A                                                                     |     |
| <b>β-CASP</b>            |     |                                                                          |     |
| SyRNaseJ                 | 235 | FASSVHRVNIILSLAQKHQRKVAVVGRSMLNVIAHARKLGVIKCPDNLFVPLKAARNLPDQQQLILTGS    | 304 |
| BsRNaseJ1                | 231 | FASNIHRLQQVIEAAVQNGRQVAVFGRSMESAIEIGQTLGYINCPKNTFIEHNEINRMPANKVTILCTGS   | 300 |
| BsRNaseJ2                | 232 | FASNIHRIQQVIAAAQNGRKIAVAGKNLQSVLQARKLGYIEADDELFIQVQVKKYPKREVVAIITAGS     | 301 |
| CrRNaseJ                 | 346 | FASNLHRLYGVKRAADAAGRKICFVGASLNHYLEAAWRDGRAPFDPKELMPTQLRHANPNEVLIVTTGS    | 415 |
| rnj_3BK1.pdb_chainA_s001 | 236 | FASHIHRIQSVIWAAEKYGRKVAMEGRSMLKFSRIAELGVLKVKDR-LYTLLEVKDLDPHQVLILATGS    | 304 |
| <u>Consensus aa:</u>     |     | FASslHRlb.VbpaA...GRKlthhg.Sh.phlpha.c.G.h.hssp.hshppl+chsspVhIltGS      |     |
| <u>Consensus ss:</u>     |     | hhhhhhhhhhhhh eeeee hhhhhhhhhhhh hhh hhhh eeeee                          |     |

SyRNaseJ 305 QGEPLAAMTRISNGEHPQIKIRQGDTVVFSANPIPGNTIIVVNTIDRLMMQGANVIYGKHQGIHVSGHAS 374  
 BsRNaseJ1 301 QGEPMAALSRIANGTHRQISINPGD TVVFS SSP I PGNTI SVSRTINQLYRAGAEVIHGPLNDIHTSGHGG 370  
 BsRNaseJ2 302 QGEPLAALTRMANKAHQKQLNIEEGD TVVIA STPIPGQELIYSKTVDLLARAGA QVIFAQK-RVHVS GHGS 370  
 CrRNaseJ 416 QGEPRAQLSMAARDQSNILKTLPGDLLLSAKVIPGNEGKVTKMLNALAGQGARVRQSRADNLHTSGHAY 485  
 rnj\_3BK1.pdb\_chainA\_s001 305 QGQPMSVLHRLAFEGHAKMAIKPGD TVILSSSPIPGNEEA VNRVINRLYALGAYVLYPPTYKVHASGHAS 374  
 Consensus aa:  
 Consensus ss:  
 hhhhhhhh eee eeeee hhhhhhhhhhhhh eeeee eeeee

SyRNaseJ 375 QEEHKMLLALTRPKFFVPVHGEHRMLVKHSQMAQAQGIPISENIVIVNNGDVIELTGDRIRVAGQVP SGIE 444  
 BsRNaseJ1 371 QEEQKLMRLIKPKFFMPIHGEYRMQKMHVKLATDCGIP EENCFIMDNGEVLALKGDEASVAGKIPSGSV 440  
 BsRNaseJ2 371 QEELKLMINILKPKYLIPVNGEYRMQKAHSKIAEETGMKRSDIFLIEKGDVVEFRGQNVKIGDKVPYGN I 440  
 CrRNaseJ 486 QEELVELLQSVRPQHFLPVHGEYAFLEHALLAKTR-AGVNF TDVIRNGEMLAVRERR--NRNTVSTGSM 552  
 rnj\_3BK1.pdb\_chainA\_s001 375 QEELKLILNLTPRFPLPVHGEVRHQMNFKWLAESMSRP PEKTLIGENGAVYRLTRET FEKVG E VPHGVL 444  
 Consensus aa:  
 Consensus ss:  
 hhhhhhhhhh eeeee hhhhhhhhhhhhh hhhhee eeeee eeeeeeee e

SyRNaseJ 445 LVDQAGIVH-----ESTMAERQQMAEDGLVTVA A---ALSK-TGTL 482  
 BsRNaseJ1 441 YIDGSGIGDIG-----NIVLRDRRILSEGLVIVVV---SIDMDDFKIS 481  
 BsRNaseJ2 441 LIDGLGVGDIG-----NIVLRDRRLS QDGI LIVVI---TLDKQKHLV 481  
 CrRNaseJ 553 AVAAARGGF EAPTMVKYDGE EPTYF FNDGGKGTGTRTEME IDMRGT MAMEG VVVGV D VIRR SAGDYGLG 622  
 rnj\_3BK1.pdb\_chainA\_s001 445 YVDGLGVGDIT-----EELADRRHMAEEGLVVITA---LAGEDP--- 481  
 Consensus aa:  
 Consensus ss:  
 eee hhhhhhhhhhh eeeee eee ee

SyRNaseJ 483 AYP EVHCRGVMTIQPKLLEELIVRTIENFLTERWSEFTHGSNGSTEVSWNALQKELESSLQRLIKRELQ 552  
 BsRNaseJ1 482 AGPDLISRGFVYMRRESGDLINDAQELISNHLQKVMERK-----TTQWSEIKNEITDTLAPFLYEKTK 543  
 BsRNaseJ2 482 SGPEIITRGFVYVRESEGLIVQATELVRSIVTEATETS-----NVEWSTLKQAMRDALNQFLYEKTK 543  
 CrRNaseJ 623 CGVRVTTRGMWTD E--GKLP AELTA AVENAVARLSGT-----CSLVEVERAAIDAVKRRCIAFNN 680  
 rnj\_3BK1.pdb\_chainA\_s001 482 -VVEVVS RGFVK--AGERLLGEVRRMALEALKNGVRE-----KKPLERIRDDIYYPVKKFLKKTG 539  
 Consensus aa:  
 Consensus ss:  
 eeeee eee hhhhhhhhhhhhhhhhhhh hhhhhhhhhhhhhhhhhhh

C-terminal domain

SyRNaseJ 553 SSPMVLMLQTDTPIELDQVPQNV-----STVSA----- 581  
 BsRNaseJ1 544 RRP MILPIIMEV----- 555  
 BsRNaseJ2 544 RKP MI IPIIMEV----- 555  
 CrRNaseJ 681 KRPEVIAIAYEH DPRDAHVAEVAEARADAAARANRARGE PEDAGGPASVLT PRRKAQNPWESGAAGSSIR 750  
 rnj\_3BK1.pdb\_chainA\_s001 540 RDP MILPVVIEG----- 551  
 Consensus aa:  
 Consensus ss:  
 +cPbllslhHE.....  
 eeeeeeee

```

SyRNaseJ          582  -----TSATPAPRKKVVLTK-----TPEPKVKAKPEKVVVTTAEPSAQ-PVSTTTK 625
BsRNaseJ1
BsRNaseJ2
CrRNaseJ
rnj_3BK1.pdb_chainA_s001
Consensus_aa:
Consensus_ss:

SyRNaseJ          626  VYRRSRKRSTT-----SVSS----- 640
BsRNaseJ1
BsRNaseJ2
CrRNaseJ          814  KVRRSR--TTTAPAPDSGIISISGSTDDDEDAAAAAGPASGSVAADEDSKLSRMLRARKAAASTRRTRA 881
rnj_3BK1.pdb_chainA_s001
Consensus_aa:
Consensus_ss:

SyRNaseJ
BsRNaseJ1
BsRNaseJ2
CrRNaseJ          882  DKGEEGAGTTLTPLDPKVIADRRQRNPRDRPHSIEDPDYG 920
rnj_3BK1.pdb_chainA_s001
Consensus_aa:
Consensus_ss:

```

**Supplementary Figure 1. Primary and secondary structure of Sy RNase E and Sy RNase J (PROMALS3D).** A) Multiple protein sequence alignment of RNase E/G proteins from *Synechocystis* and *E. coli* using the structure template of *Ec* RNase E (PDB ID: 2bx2, chain L). Conserved domains are underlined: RNase H in green, S1 in blue, 5'sensor in pink and DNase I in red; the C1 to C4 motifs are highlighted in cyano.  $\alpha$ -helix predictions are colored in red and  $\beta$ -strand in blue. B) Multiple protein sequences alignment of *Sy* RNase J, *Bs* RNase J1/J2 and *Cr* RNase J using the structure template of *Tt* RNaseJ1 (PDB ID: 3BK1 chain A). The  $\beta$ -lactamase motifs are in yellow, the  $\beta$ -CASP motifs in green. The  $\beta$ -CASP domain is underlined in blue and the C-terminal domain in pink. In A and B the consensus secondary structure (Consensus\_ss) is indicated by h ( $\alpha$ -helix) and e ( $\beta$ -strand). In the consensus amino acid sequence (Consensus\_aa) conserved amino acids are in bold and uppercase letters; aliphatic: l; aromatic: @; hydrophobic: h; alcohol: o; polar residues: p; tiny: t; small: s; bulky residues: b; positively charged: +; negatively charged: -; charged: c.

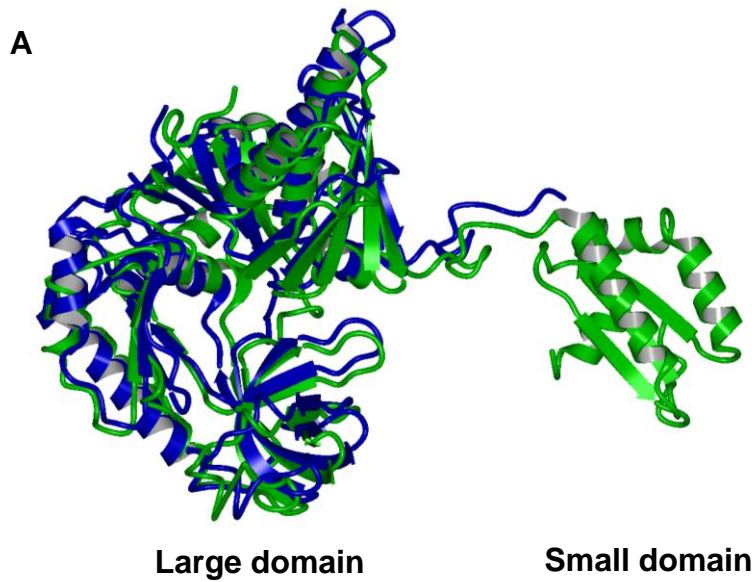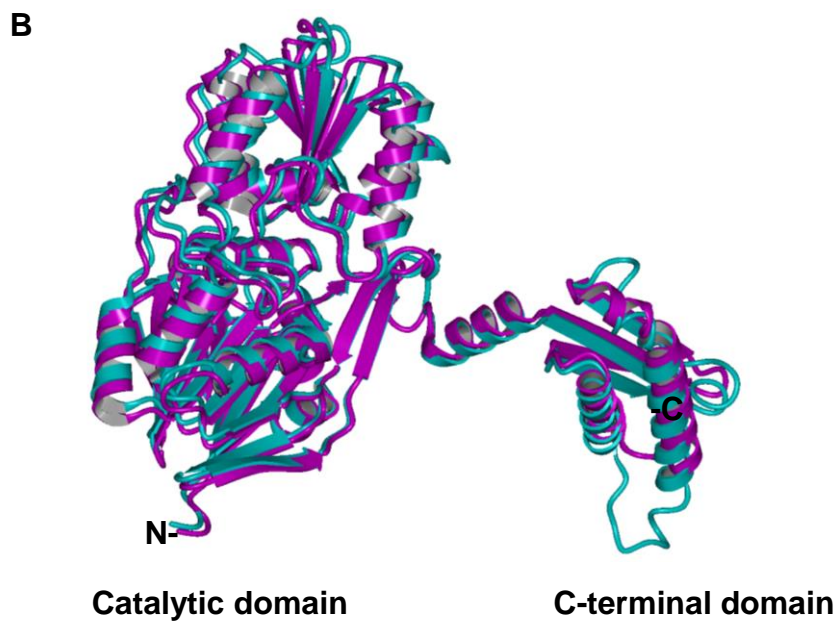

**Supplementary Figure 2. Homology-based model of the *Sy* RNase and *Sy* RNase J structures.** (A) The modeled catalytic region of *Sy* RNase E (blue) superimposed on the *E. coli* crystal structure PDB 2bx2, chain L (green). (B) The modeled structure of *Sy* RNase J (cyano) superimposed on the *T. thermophilus* crystal structure PDB 3BK1 (magenta).

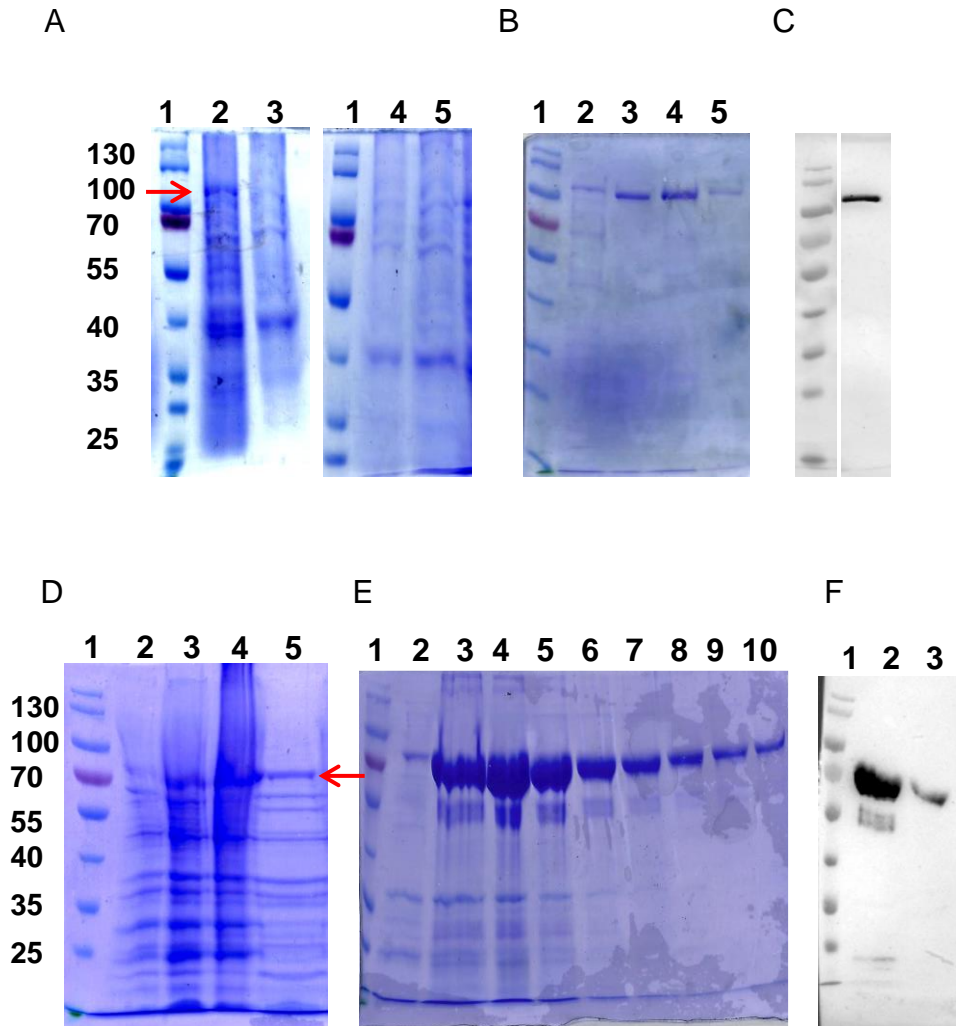

**Supplementary Figure 3. Expression and purification of recombinant Sy RNase E (A-C) and Sy RNase J (D-F) in *E. coli*.** SDS-PAGE was carried out on a 10% polyacrylamide gel and proteins were detected by Coomassie Brilliant Blue R-250 stain. A) Induction of Sy RNase E: Lane 1, MW standards. Lanes 2 and 3, insoluble fractions after and before induction with 1 mM IPTG, respectively. Lanes 4 and 5, soluble fraction after and before induction, respectively. B) Purification of Sy RNase J His-tagged recombinant protein. Lane 1, MW standards. Lanes 2 to 5, purified RNase E. C) Immunoblot with anti-His tag antibody on collected pooled dialyzed proteins from lanes 3-5 of the gel in B). D) Induction of Sy RNase J. Lane 1, MW standards; Lanes 2 and 3, whole cell lysates before and after induction, respectively. Lanes 4 and 5, insoluble fractions and soluble fraction after induction. E) Purification of Sy RNase J His-tagged recombinant protein. Lane 1, MW standards. Lanes 2 to 8, purified RNase J. F) Immunoblot with anti-His tag antibody. Pooled purified dialyzed proteins from lanes 1 to 4 (Lane 1) and from lanes 5 to 9, (Lane 2), respectively.



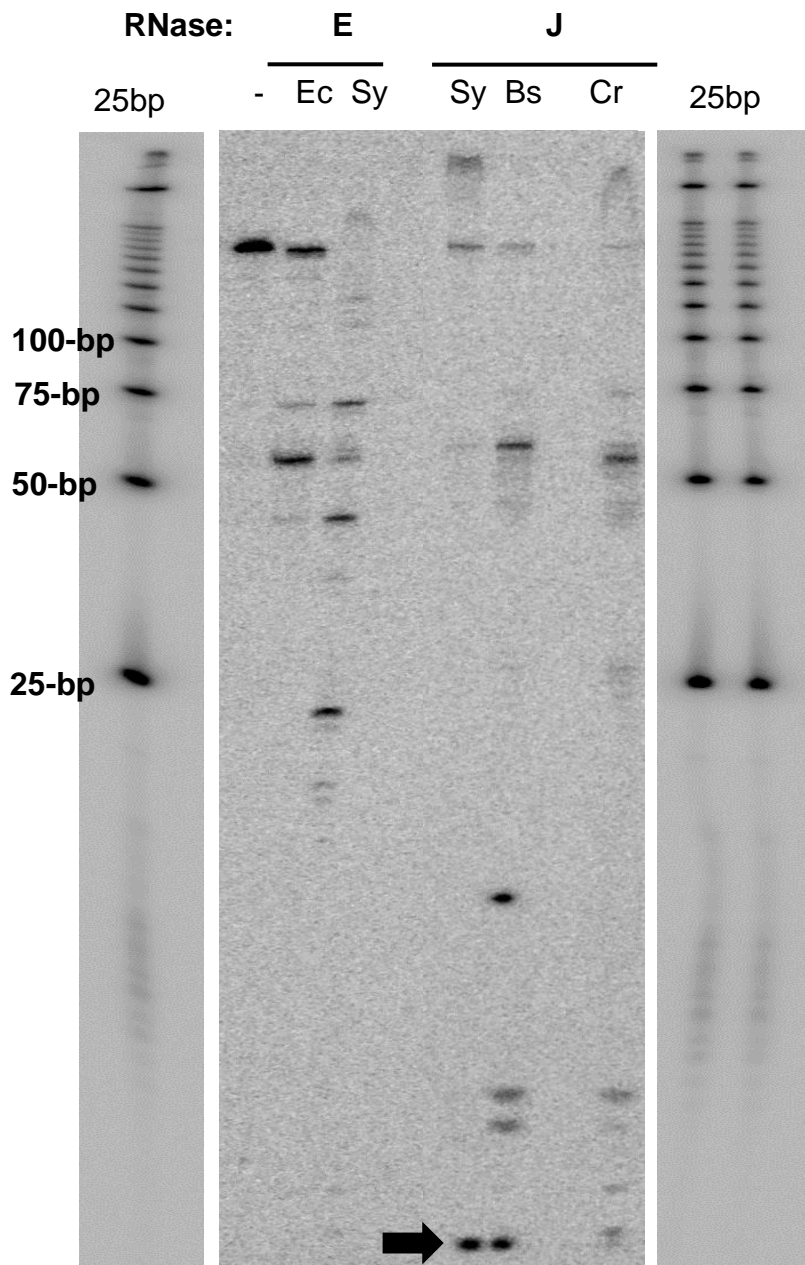

**Supplementary Figure 4. *In vitro* activity of *Sy* RNase E and *Sy* RNase J.** A 5'-monophosphorilated (P) -  $^{32}$ P end-labeled *yitJ* was incubated with RNase E (E) from *E. coli* (*Ec*) and *Synechocystis* (*Sy*) and RNase J (J) from *Synechocystis* (*Sy*), *B. subtilis* (*Bs*), and *C.reinhardtii* (*Cr*). As control (lane 1) the transcript was incubated with the reaction buffer only (-). The reactions were separated on a 20% urea PAGE gel. The mononucleotides corresponding to liberated 5'-terminal nucleotide are at the bottom of the gel (depicted by an arrow) and are indicative of a 5'-3' exoribonuclease activity. L=  $^{32}$ P-labeled 25 bp DNA ladder.

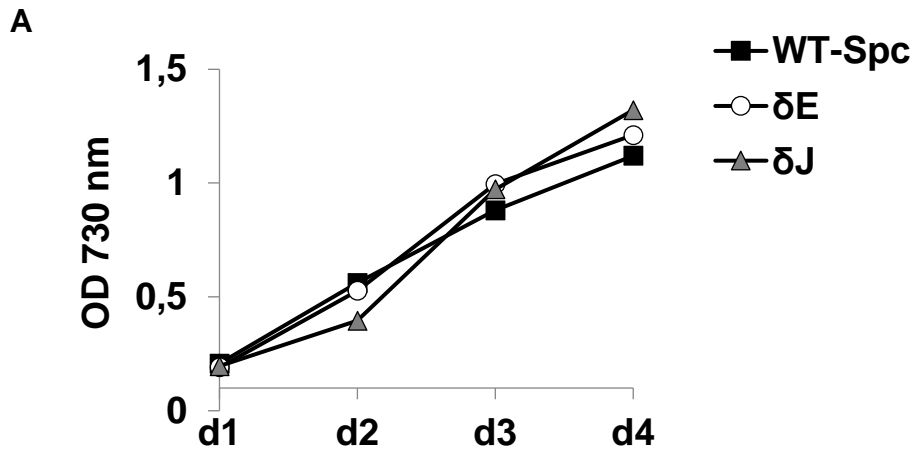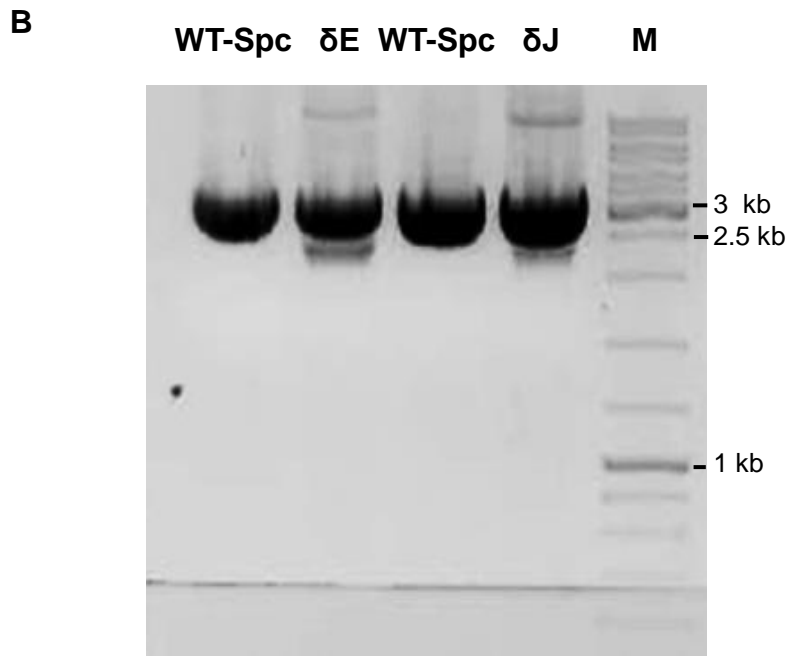

**Supplementary Figure 5. Genetic instability of *rne* and *rnj* deletion.** A) Growth curves of *Synechocystis* mutants and WT strains in the absence of antibiotic in BG11 medium. B) PCR analysis of wild-type (WT-Spc) and mutant strains ( $\delta E$  and  $\delta J$ ) grown in the absence of spectinomycin. The almost exclusive presence of the WT gene copy (~3.5 kb band) over the mutant gene copy (~2.5 kb and ~2.4 kb) in the mutant strains highlights the rapid loss of the partial gene deletions in the absence of antibiotic pressure.

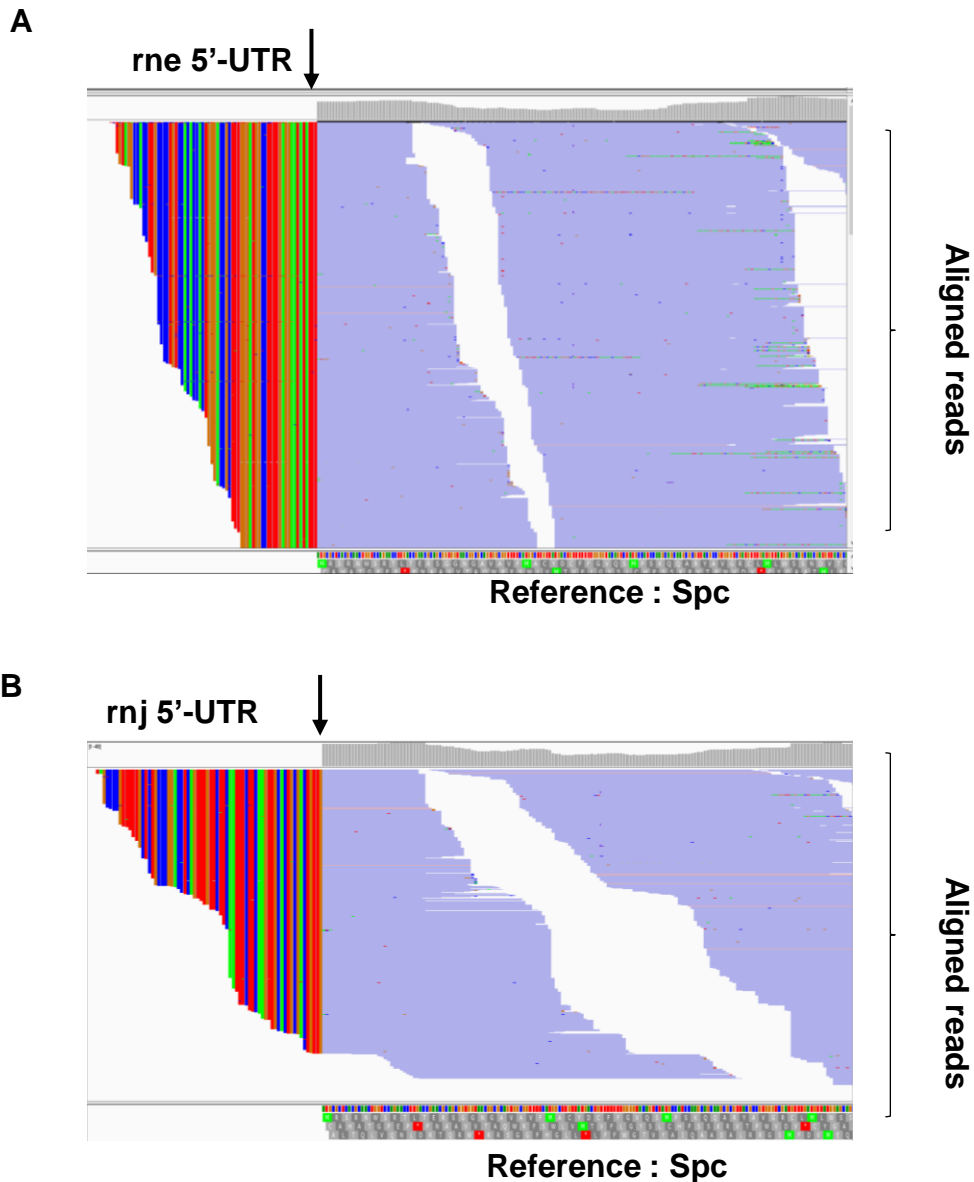

**Supplementary Figure 6. Browser view of RNA-Seq soft-clipped reads showing the integration of the Spc cassette at the intended locus.** Reads from replicates S4 (A) and S7 (B) are shown as representative examples. In these snapshots, the first 160-nt of Spc sequence is shown at the bottom. The soft-clipped portion at the 5' end of the reads that do not match to the Spc coding sequence are shown as multicolour “rainbow” (C: blue, U: red; A: green; G: brown). The breakpoint of soft-clipped reads from reference is indicated by the arrow. The soft-clipped sequence corresponds to the sequence of 5'-UTR of *Sy rne* (A) and *Sy rnj* (B).

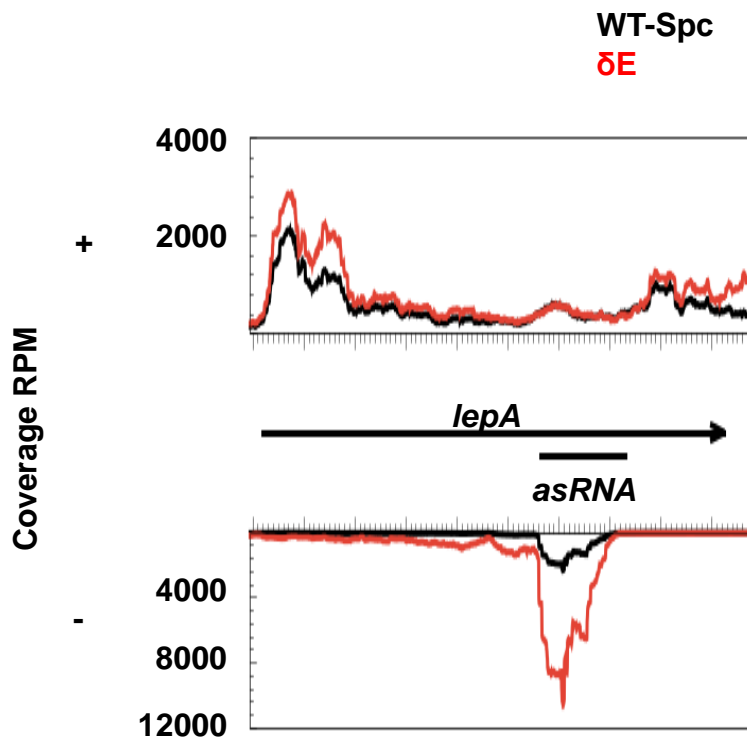

**Supplementary Figure 7. Antisense coverage over *lepA*.** RNA-Seq coverage over the *lepA* gene in the WT (black) and in the  $\delta E$  mutant (red), on the sense (+) strand (on the top) and on the antisense (-) strand (on the bottom). Arrow represents the *lepA* ORF and its orientation on the genome; the line represents the *asRNA* identified by (Georg et al., 2009). RPM: reads per million
