# Supplementary material for: Impact of RNase E and RNase J on Global mRNA Metabolism in the Cyanobacterium Synechocystis PCC6803
Source: Front Microbiol. 2020 Jun 3;11:1055. doi: 10.3389/fmicb.2020.01055 (PMC7283877; doi:10.3389/fmicb.2020.01055)
Supplement: TABLE S3 — Functional annotation from the Alcodb cyano database of differentially expressed protein coding genes (ORF and UTRs). [file Table_3.XLSX]

## Sheet: Table S3
Functional annotation from the Alcodb cyano database of 1502 differentially expressed gene features in δE and δJ
up regulated log2FC ≥ 0.7
down regulated log2FC ≤ -0.7
							enzymatic activity			Gene ontology
Mutant	Gene	Type	Protein	localization	Process	Pathway	EC.number	Catalytic.activity	Cofactor	biological process	molecular function	cellular component
δE	sll0006	CDS	putative aminotransferase	Cytoplasmic	Amino acid biosynthesis	Aspartate family	NA	NA	NA	NA	NA	NA
δE	sll0084	CDS	putative phosphatase	Cytoplasmic	Amino acid biosynthesis	NA	NA	NA	NA	GO:0000105 histidine biosynthetic process GO:0008152 metabolic process	NA	GO:0003824 catalytic activity GO:0004401 histidinol-phosphatase activity
δE	sll0356	CDS	N-(5'-phosphoribosyl)anthranilate isomerase	Cytoplasmic	Amino acid biosynthesis	Aromatic amino acid family	5.3.1.24	CATALYTIC ACTIVITY: N-(5-phospho-beta-D-ribosyl)anthranilate = 1-(2-carboxyphenylamino)-1-deoxy-D-ribulose 5-phosphate.	NA	tryptophan biosynthetic process [GO:0000162]	phosphoribosylanthranilate isomerase activity [GO:0004640]	NA
δJ	sll0450	CDS	cytochrome b subunit of nitric oxide reductase	CytoplasmicMembrane	Amino acid biosynthesis	Glutamate family / Nitrogen assimilation	NA	NA	NA	NA	NA	NA
δE	sll0712	CDS	cysteine synthase	Cytoplasmic	Amino acid biosynthesis	Serine family / Sulfur assimilation	2.5.1.47	NA	NA	GO:0006535 cysteine biosynthetic process from serine GO:0008152 metabolic process	GO:0003824 catalytic activity GO:0030170 pyridoxal phosphate binding	NA
δE	sll0712	3'UTR	cysteine synthase	Cytoplasmic	Amino acid biosynthesis	Serine family / Sulfur assimilation	2.5.1.47	NA	NA	GO:0006535 cysteine biosynthetic process from serine GO:0008152 metabolic process	GO:0003824 catalytic activity GO:0030170 pyridoxal phosphate binding	NA
δE	sll0712	5'UTR	cysteine synthase	Cytoplasmic	Amino acid biosynthesis	Serine family / Sulfur assimilation	2.5.1.47	NA	NA	GO:0006535 cysteine biosynthetic process from serine GO:0008152 metabolic process	GO:0003824 catalytic activity GO:0030170 pyridoxal phosphate binding	NA
δE	sll0900	3'UTR	ATP phosphoribosyltransferase	Cytoplasmic	Amino acid biosynthesis	Aromatic amino acid family	2.4.2.17	CATALYTIC ACTIVITY: 1-(5-phospho-beta-D-ribosyl)-ATP + diphosphate = ATP + 5-phospho-alpha-D-ribose 1-diphosphate.	NA	histidine biosynthetic process [GO:0000105]	ATP binding [GO:0005524]; ATP phosphoribosyltransferase activity [GO:0003879]	cytoplasm [GO:0005737]
δE	sll1058	CDS	dihydrodipicolinate reductase	Cytoplasmic	Amino acid biosynthesis	Aspartate family	1.17.1.8	CATALYTIC ACTIVITY: (S)-2,3,4,5-tetrahydropyridine-2,6-dicarboxylate + NAD(P)(+) + H(2)O = (2S,4S)-4-hydroxy-2,3,4,5-tetrahydrodipicolinate + NAD(P)H. {ECO:0000255|HAMAP-Rule:MF_00102}.	NA	diaminopimelate biosynthetic process [GO:0019877]; lysine biosynthetic process via diaminopimelate [GO:0009089]	4-hydroxy-tetrahydrodipicolinate reductase [GO:0008839]; NAD binding [GO:0051287]; NADP binding [GO:0050661]; oxidoreductase activity, acting on CH or CH2 groups, NAD or NADP as acceptor [GO:0016726]	cytosol [GO:0005829]
δE	sll1058	5'UTR	dihydrodipicolinate reductase	Cytoplasmic	Amino acid biosynthesis	Aspartate family	1.17.1.8	CATALYTIC ACTIVITY: (S)-2,3,4,5-tetrahydropyridine-2,6-dicarboxylate + NAD(P)(+) + H(2)O = (2S,4S)-4-hydroxy-2,3,4,5-tetrahydrodipicolinate + NAD(P)H. {ECO:0000255|HAMAP-Rule:MF_00102}.	NA	diaminopimelate biosynthetic process [GO:0019877]; lysine biosynthetic process via diaminopimelate [GO:0009089]	4-hydroxy-tetrahydrodipicolinate reductase [GO:0008839]; NAD binding [GO:0051287]; NADP binding [GO:0050661]; oxidoreductase activity, acting on CH or CH2 groups, NAD or NADP as acceptor [GO:0016726]	cytosol [GO:0005829]
δE	sll1112	CDS	3-dehydroquinate dehydratase	Cytoplasmic	Amino acid biosynthesis	Aromatic amino acid family	4.2.1.10	CATALYTIC ACTIVITY: 3-dehydroquinate = 3-dehydroshikimate + H(2)O.	NA	aromatic amino acid family biosynthetic process [GO:0009073]; chorismate biosynthetic process [GO:0009423]	3-dehydroquinate dehydratase activity [GO:0003855]	NA
δE	sll1112	3'UTR	3-dehydroquinate dehydratase	Cytoplasmic	Amino acid biosynthesis	Aromatic amino acid family	4.2.1.10	CATALYTIC ACTIVITY: 3-dehydroquinate = 3-dehydroshikimate + H(2)O.	NA	aromatic amino acid family biosynthetic process [GO:0009073]; chorismate biosynthetic process [GO:0009423]	3-dehydroquinate dehydratase activity [GO:0003855]	NA
δE	sll1172	3'UTR	threonine synthase	Cytoplasmic	Amino acid biosynthesis	Aspartate family	4.2.3.1	CATALYTIC ACTIVITY: O-phospho-L-homoserine + H(2)O = L-threonine + phosphate.	COFACTOR: Name=pyridoxal 5'-phosphate; Xref=ChEBI:CHEBI:597326; Evidence={ECO:0000250};	threonine biosynthetic process [GO:0009088]	pyridoxal phosphate binding [GO:0030170]; threonine synthase activity [GO:0004795]	NA
δE	sll1662	CDS	probable prephenate dehydratase	Cytoplasmic	Amino acid biosynthesis	Aromatic amino acid family	4.2.1.51	NA	NA	GO:0009094 L-phenylalanine biosynthetic process GO:0008152 metabolic process	GO:0016597 amino acid binding GO:0004664 prephenate dehydratase activity	NA
δE	sll1688	5'UTR	threonine synthase	Cytoplasmic	Amino acid biosynthesis	Aspartate family	4.2.3.1	NA	NA	GO:0008152 metabolic process GO:0009088 threonine biosynthetic process	GO:0003824 catalytic activity GO:0030170 pyridoxal phosphate binding GO:0004795 threonine synthase activity	NA
δE	sll1760	5'UTR	homoserine kinase	Unknown	Amino acid biosynthesis	Aspartate family	2.7.1.39	CATALYTIC ACTIVITY: ATP + L-homoserine = ADP + O-phospho-L-homoserine. {ECO:0000255|HAMAP-Rule:MF_00384}.	NA	threonine biosynthetic process [GO:0009088]	ATP binding [GO:0005524]; homoserine kinase activity [GO:0004413]	cytoplasm [GO:0005737]
δE	sll1958	CDS	histidinol phosphate aminotransferase	Cytoplasmic	Amino acid biosynthesis	Aromatic amino acid family	2.6.1.9	CATALYTIC ACTIVITY: L-histidinol phosphate + 2-oxoglutarate = 3-(imidazol-4-yl)-2-oxopropyl phosphate + L-glutamate.	COFACTOR: Name=pyridoxal 5'-phosphate; Xref=ChEBI:CHEBI:597326; Evidence={ECO:0000250};	GO:0009058 biosynthetic process GO:0000105 histidine biosynthetic process GO:0008152 metabolic process	GO:0003824 catalytic activity GO:0004400 histidinol-phosphate transaminase activity GO:0030170 pyridoxal phosphate binding GO:0016740 transferase activity GO:0016769 transferase activity, transferring nitrogenous groups	NA
δE	sll1958	5'UTR	histidinol phosphate aminotransferase	Cytoplasmic	Amino acid biosynthesis	Aromatic amino acid family	2.6.1.9	CATALYTIC ACTIVITY: L-histidinol phosphate + 2-oxoglutarate = 3-(imidazol-4-yl)-2-oxopropyl phosphate + L-glutamate.	COFACTOR: Name=pyridoxal 5'-phosphate; Xref=ChEBI:CHEBI:597326; Evidence={ECO:0000250};	GO:0009058 biosynthetic process GO:0000105 histidine biosynthetic process GO:0008152 metabolic process	GO:0003824 catalytic activity GO:0004400 histidinol-phosphate transaminase activity GO:0030170 pyridoxal phosphate binding GO:0016740 transferase activity GO:0016769 transferase activity, transferring nitrogenous groups	NA
δE	sll1981	5'UTR	acetolactate synthase	Cytoplasmic	Amino acid biosynthesis	Branched chain family	NA	NA	NA	NA	NA	NA
δE	slr0055	3'UTR	anthranilate synthase component II	Cytoplasmic	Amino acid biosynthesis	Aromatic amino acid family	NA	NA	NA	NA	NA	NA
δJ	slr0077	3'UTR	cysteine desulfurase	Cytoplasmic	Amino acid biosynthesis	Glutamate family / Nitrogen assimilation	2.8.1.7	CATALYTIC ACTIVITY: L-cysteine + acceptor = L-alanine + S-sulfanyl-acceptor.	COFACTOR: Name=pyridoxal 5'-phosphate; Xref=ChEBI:CHEBI:597326; Evidence={ECO:0000250};	cysteine metabolic process [GO:0006534]	cysteine desulfurase activity [GO:0031071]; pyridoxal phosphate binding [GO:0030170]	NA
δE	slr0084	5'UTR	amidotransferase HisH	Cytoplasmic	Amino acid biosynthesis	Aromatic amino acid family	2.4.2.-	CATALYTIC ACTIVITY: 5-[(5-phospho-1-deoxyribulos-1-ylamino)methylideneamino]-1-(5-phosphoribosyl)imidazole-4-carboxamide + L-glutamine = imidazole-glycerol phosphate + 5-aminoimidazol-4-carboxamide ribonucleotide + L-glutamate + H(2)O.	NA	glutamine metabolic process [GO:0006541]; histidine biosynthetic process [GO:0000105]	imidazoleglycerol-phosphate synthase activity [GO:0000107]	cytoplasm [GO:0005737]; intracellular [GO:0005622]
δE	slr0199	CDS	putative glutamine amidotransferase, ergothioneine biosynthesis	Unknown	Amino acid biosynthesis	Aromatic amino acid family	2.4.2.-	NA	NA	ergothioneine biosynthetic process [GO:0052699]; glutamine metabolic process [GO:0006541]	transferase activity [GO:0016740]	NA
δE	slr0199	5'UTR	putative glutamine amidotransferase, ergothioneine biosynthesis	Unknown	Amino acid biosynthesis	Aromatic amino acid family	2.4.2.-	NA	NA	ergothioneine biosynthetic process [GO:0052699]; glutamine metabolic process [GO:0006541]	transferase activity [GO:0016740]	NA
δE	slr0212	5'UTR	5-methyltetrahydrofolate--homocysteine methyltransferase	Cytoplasmic	Amino acid biosynthesis	Aspartate family	2.1.1.13	CATALYTIC ACTIVITY: 5-methyltetrahydrofolate + L-homocysteine = tetrahydrofolate + L-methionine.	COFACTOR: Name=methyl(III)cobalamin; Xref=ChEBI:CHEBI:28115; Evidence={ECO:0000250}; ; COFACTOR: Name=Zn(2+); Xref=ChEBI:CHEBI:29105; Evidence={ECO:0000250}; ; Note=Binds 1 zinc ion per subunit. {ECO:0000250};	pteridine-containing compound metabolic process [GO:0042558]	cobalamin binding [GO:0031419]; methionine synthase activity [GO:0008705]; S-adenosylmethionine-homocysteine S-methyltransferase activity [GO:0008898]; zinc ion binding [GO:0008270]	intracellular [GO:0005622]
δE	slr0288	CDS	glutamate--ammonia ligase	Cytoplasmic	Amino acid biosynthesis	Glutamate family / Nitrogen assimilation	6.3.1.2	CATALYTIC ACTIVITY: ATP + L-glutamate + NH(3) = ADP + phosphate + L-glutamine.	NA	glutamine biosynthetic process [GO:0006542]; nitrogen fixation [GO:0009399]	ATP binding [GO:0005524]; glutamate-ammonia ligase activity [GO:0004356]	NA
δE	slr0395	3'UTR	nitrate assimilation transcriptional activator, LysR family protein	Cytoplasmic	Amino acid biosynthesis	NA	NA	NA	NA	GO:0006355 regulation of transcription, DNA-dependent	GO:0003700 transcription factor activity	NA
δE	slr0444	5'UTR	3-phosphoshikimate 1-carboxyvinyltransferase	Cytoplasmic	Amino acid biosynthesis	Aromatic amino acid family	2.5.1.19	CATALYTIC ACTIVITY: Phosphoenolpyruvate + 3-phosphoshikimate = phosphate + 5-O-(1-carboxyvinyl)-3-phosphoshikimate. {ECO:0000255|HAMAP-Rule:MF_00210}.	NA	aromatic amino acid family biosynthetic process [GO:0009073]; chorismate biosynthetic process [GO:0009423]	3-phosphoshikimate 1-carboxyvinyltransferase activity [GO:0003866]	cytoplasm [GO:0005737]
δE	slr0500	5'UTR	imidazoleglycerol-phosphate dehydratase	Cytoplasmic	Amino acid biosynthesis	Aromatic amino acid family	4.2.1.19	CATALYTIC ACTIVITY: D-erythro-1-(imidazol-4-yl)glycerol 3-phosphate = 3-(imidazol-4-yl)-2-oxopropyl phosphate + H(2)O. {ECO:0000255|HAMAP-Rule:MF_00076}.	NA	histidine biosynthetic process [GO:0000105]	imidazoleglycerol-phosphate dehydratase activity [GO:0004424]	cytoplasm [GO:0005737]
δE	slr0543	3'UTR	tryptophan synthase beta subunit	Cytoplasmic	Amino acid biosynthesis	Aromatic amino acid family	4.2.1.20	CATALYTIC ACTIVITY: L-serine + 1-C-(indol-3-yl)glycerol 3-phosphate = L-tryptophan + D-glyceraldehyde 3-phosphate + H(2)O.	COFACTOR: Name=pyridoxal 5'-phosphate; Xref=ChEBI:CHEBI:597326; Evidence={ECO:0000250};	NA	pyridoxal phosphate binding [GO:0030170]; tryptophan synthase activity [GO:0004834]	NA
δE	slr0546	5'UTR	indole-3-glycerol phosphate synthase	Cytoplasmic	Amino acid biosynthesis	Aromatic amino acid family	4.1.1.48	CATALYTIC ACTIVITY: 1-(2-carboxyphenylamino)-1-deoxy-D-ribulose 5-phosphate = 1-C-(3-indolyl)-glycerol 3-phosphate + CO(2) + H(2)O.	NA	tryptophan biosynthetic process [GO:0000162]	indole-3-glycerol-phosphate synthase activity [GO:0004425]; phosphoribosylanthranilate isomerase activity [GO:0004640]	NA
δE	slr0549	CDS	aspartate beta-semialdehyde dehydrogenese	Cytoplasmic	Amino acid biosynthesis	Aspartate family	1.2.1.11	CATALYTIC ACTIVITY: L-aspartate 4-semialdehyde + phosphate + NADP(+) = L-4-aspartyl phosphate + NADPH.	NA	de novo' L-methionine biosynthetic process [GO:0071266]; diaminopimelate biosynthetic process [GO:0019877]; isoleucine biosynthetic process [GO:0009097]; lysine biosynthetic process via diaminopimelate [GO:0009089]; threonine biosynthetic process [GO:0009088]	aspartate-semialdehyde dehydrogenase activity [GO:0004073]; N-acetyl-gamma-glutamyl-phosphate reductase activity [GO:0003942]; NAD binding [GO:0051287]; NADP binding [GO:0050661]	cytoplasm [GO:0005737]
δE	slr0549	5'UTR	aspartate beta-semialdehyde dehydrogenese	Cytoplasmic	Amino acid biosynthesis	Aspartate family	1.2.1.11	CATALYTIC ACTIVITY: L-aspartate 4-semialdehyde + phosphate + NADP(+) = L-4-aspartyl phosphate + NADPH.	NA	de novo' L-methionine biosynthetic process [GO:0071266]; diaminopimelate biosynthetic process [GO:0019877]; isoleucine biosynthetic process [GO:0009097]; lysine biosynthetic process via diaminopimelate [GO:0009089]; threonine biosynthetic process [GO:0009088]	aspartate-semialdehyde dehydrogenase activity [GO:0004073]; N-acetyl-gamma-glutamyl-phosphate reductase activity [GO:0003942]; NAD binding [GO:0051287]; NADP binding [GO:0050661]	cytoplasm [GO:0005737]
δE	slr0550	3'UTR	dihydrodipicolinate synthase	Cytoplasmic	Amino acid biosynthesis	Aspartate family	4.3.3.7	CATALYTIC ACTIVITY: Pyruvate + L-aspartate-4-semialdehyde = (4S)-4-hydroxy-2,3,4,5-tetrahydro-(2S)-dipicolinate + H(2)O. {ECO:0000255|HAMAP-Rule:MF_00418}.	NA	diaminopimelate biosynthetic process [GO:0019877]; lysine biosynthetic process via diaminopimelate [GO:0009089]	4-hydroxy-tetrahydrodipicolinate synthase [GO:0008840]	cytoplasm [GO:0005737]
δE	slr0596	CDS	creatinine amidohydrolase	Cytoplasmic	Amino acid biosynthesis	Glutamate family / Nitrogen assimilation	3.5.2.10	NA	NA	NA	creatininase activity [GO:0047789]	NA
δE	slr0596	5'UTR	cruA lycopene cyclase CruA	Cytoplasmic	Amino acid biosynthesis	Glutamate family / Nitrogen assimilation	3.5.2.10	NA	NA	NA	creatininase activity [GO:0047789]	NA
δE	slr0608	CDS	histidine biosynthesis bifunctional protein HisIE	Cytoplasmic	Amino acid biosynthesis	Aromatic amino acid family	3.5.4.19; 3.6.1.31	CATALYTIC ACTIVITY: 1-(5-phospho-beta-D-ribosyl)-ATP + H(2)O = 1-(5-phospho-beta-D-ribosyl)-AMP + diphosphate.; CATALYTIC ACTIVITY: 1-(5-phospho-beta-D-ribosyl)-AMP + H(2)O = 1-(5-phospho-beta-D-ribosyl)-5-((5-phospho-beta-D-ribosylamino)methylideneamino)imidazole-4-carboxamide.	NA	histidine biosynthetic process [GO:0000105]	ATP binding [GO:0005524]; phosphoribosyl-AMP cyclohydrolase activity [GO:0004635]; phosphoribosyl-ATP diphosphatase activity [GO:0004636]	cytoplasm [GO:0005737]
δE	slr0644	CDS	nitrogen regulation protein NifR3 homolog	Cytoplasmic	Amino acid biosynthesis	Glutamate family / Nitrogen assimilation	1.3.1.-	CATALYTIC ACTIVITY: 5,6-dihydrouracil in tRNA + NAD(P)(+) = uracil in tRNA + NAD(P)H. {ECO:0000250|UniProtKB:P33371}.	COFACTOR: Name=FMN; Xref=ChEBI:CHEBI:58210; Evidence={ECO:0000250|UniProtKB:P33371};	tRNA dihydrouridine synthesis [GO:0002943]	flavin adenine dinucleotide binding [GO:0050660]; tRNA binding [GO:0000049]; tRNA dihydrouridine synthase activity [GO:0017150]	cytosol [GO:0005829]
δE	slr0682	CDS	histidinol dehydrogenase	Cytoplasmic	Amino acid biosynthesis	Aromatic amino acid family	1.1.1.23	CATALYTIC ACTIVITY: L-histidinol + H(2)O + 2 NAD(+) = L-histidine + 2 NADH.	NA	histidine biosynthetic process [GO:0000105]	histidinol dehydrogenase activity [GO:0004399]; NAD binding [GO:0051287]; zinc ion binding [GO:0008270]	NA
δE	slr0966	3'UTR	tryptophan synthase alpha chain	Cytoplasmic	Amino acid biosynthesis	Aromatic amino acid family	4.2.1.20	CATALYTIC ACTIVITY: L-serine + 1-C-(indol-3-yl)glycerol 3-phosphate = L-tryptophan + D-glyceraldehyde 3-phosphate + H(2)O. {ECO:0000255|HAMAP-Rule:MF_00131}.	NA	tryptophan biosynthetic process [GO:0000162]	pyridoxal phosphate binding [GO:0030170]; tryptophan synthase activity [GO:0004834]	NA
δE	slr1348	CDS	serine acetyltransferase	Cytoplasmic	Amino acid biosynthesis	Serine family / Sulfur assimilation	2.3.1.30	CATALYTIC ACTIVITY: Acetyl-CoA + L-serine = CoA + O-acetyl-L-serine.	NA	cysteine biosynthetic process from serine [GO:0006535]	serine O-acetyltransferase activity [GO:0009001]	cytoplasm [GO:0005737]
δE	slr1559	CDS	shikimate 5-dehydrogenase	Cytoplasmic	Amino acid biosynthesis	Aromatic amino acid family	1.1.1.25	CATALYTIC ACTIVITY: Shikimate + NADP(+) = 3-dehydroshikimate + NADPH. {ECO:0000255|HAMAP-Rule:MF_00222}.	NA	aromatic amino acid family biosynthetic process [GO:0009073]; chorismate biosynthetic process [GO:0009423]; shikimate metabolic process [GO:0019632]	NADP binding [GO:0050661]; shikimate 3-dehydrogenase (NADP+) activity [GO:0004764]	NA
δE	slr1665	3'UTR	diaminopimelate epimerase	Cytoplasmic	Amino acid biosynthesis	Aspartate family	5.1.1.7	CATALYTIC ACTIVITY: LL-2,6-diaminoheptanedioate = meso-diaminoheptanedioate. {ECO:0000255|HAMAP-Rule:MF_00197}.	NA	lysine biosynthetic process via diaminopimelate [GO:0009089]	diaminopimelate epimerase activity [GO:0008837]	cytoplasm [GO:0005737]
δE	slr1756	3'UTR	glutamate--ammonia ligase	Cytoplasmic	Amino acid biosynthesis	Glutamate family / Nitrogen assimilation	6.3.1.2	CATALYTIC ACTIVITY: ATP + L-glutamate + NH(3) = ADP + phosphate + L-glutamine.	NA	glutamine biosynthetic process [GO:0006542]; nitrogen fixation [GO:0009399]	ATP binding [GO:0005524]; glutamate-ammonia ligase activity [GO:0004356]	cytoplasm [GO:0005737]
δE	slr1756	CDS	glutamate--ammonia ligase	Cytoplasmic	Amino acid biosynthesis	Glutamate family / Nitrogen assimilation	6.3.1.2	CATALYTIC ACTIVITY: ATP + L-glutamate + NH(3) = ADP + phosphate + L-glutamine.	NA	glutamine biosynthetic process [GO:0006542]; nitrogen fixation [GO:0009399]	ATP binding [GO:0005524]; glutamate-ammonia ligase activity [GO:0004356]	cytoplasm [GO:0005737]
δE	slr1791	CDS	phosphoadenosine phosphosulfate reductase	Cytoplasmic	Amino acid biosynthesis	Serine family / Sulfur assimilation	1.8.4.8	CATALYTIC ACTIVITY: Adenosine 3',5'-bisphosphate + sulfite + thioredoxin disulfide = 3'-phosphoadenylyl sulfate + thioredoxin.	NA	cysteine biosynthetic process [GO:0019344]; hydrogen sulfide biosynthetic process [GO:0070814]; methionine biosynthetic process [GO:0009086]; sulfate assimilation, phosphoadenylyl sulfate reduction by phosphoadenylyl-sulfate reductase (thioredoxin) [GO:0019379]	phosphoadenylyl-sulfate reductase (thioredoxin) activity [GO:0004604]	cytoplasm [GO:0005737]
δE	slr2130	5'UTR	3-dehydroquinate synthase	Cytoplasmic	Amino acid biosynthesis	Aromatic amino acid family	4.2.3.4	CATALYTIC ACTIVITY: 3-deoxy-D-arabino-hept-2-ulosonate 7-phosphate = 3-dehydroquinate + phosphate.	COFACTOR: Name=NAD(+); Xref=ChEBI:CHEBI:57540; Evidence={ECO:0000250}; ; COFACTOR: Name=Co(2+); Xref=ChEBI:CHEBI:48828; Evidence={ECO:0000250}; Name=Zn(2+); Xref=ChEBI:CHEBI:29105; Evidence={ECO:0000250}; ; Note=Binds 1 divalent metal cation per subunit. Can use either Co(2+) or Zn(2+). {ECO:0000250};	aromatic amino acid family biosynthetic process [GO:0009073]; chorismate biosynthetic process [GO:0009423]	3-dehydroquinate synthase activity [GO:0003856]	cytoplasm [GO:0005737]
δE	ssl0707	CDS	nitrogen regulatory protein P-II	CytoplasmicMembrane	Amino acid biosynthesis	Glutamate family / Nitrogen assimilation	NA	NA	NA	regulation of nitrogen utilization [GO:0006808]; regulation of transcription, DNA-templated [GO:0006355]; transcription, DNA-templated [GO:0006351]	enzyme regulator activity [GO:0030234]; nucleotide binding [GO:0000166]	NA
δE	sll0023	CDS	geranylgeranyl hydrogenase	Cytoplasmic	Biosynthesis of cofactors, prosthetic groups, and carriers	Cobalamin, heme, phycobilin and porphyrin	1.3.1.83	CATALYTIC ACTIVITY: Phytyl diphosphate + 3 NADP(+) = geranylgeranyl diphosphate + 3 NADPH.	NA	chlorophyll biosynthetic process [GO:0015995]; photosynthesis [GO:0015979]	FAD binding [GO:0071949]; geranylgeranyl reductase activity [GO:0045550]; oxidoreductase activity, acting on the CH-CH group of donors, NAD or NADP as acceptor [GO:0016628]	NA
δE/δJ	sll0037	5'UTR	xfp xylulose-5-phosphate/fructose-6-phosphate phosphoketolase	Cytoplasmic	Biosynthesis of cofactors, prosthetic groups, and carriers	Cobalamin, heme, phycobilin and porphyrin	4.99.1.3	CATALYTIC ACTIVITY: Cobalt-sirohydrochlorin + 2 H(+) = sirohydrochlorin + Co(2+).	COFACTOR: Name=[4Fe-4S] cluster; Xref=ChEBI:CHEBI:49883; Evidence={ECO:0000305}; ; Note=Binds 1 [4Fe-4S] cluster per dimer. {ECO:0000305};	cobalamin biosynthetic process [GO:0009236]	4 iron, 4 sulfur cluster binding [GO:0051539]; metal ion binding [GO:0046872]; sirohydrochlorin cobaltochelatase activity [GO:0016852]	NA
δE/δJ	sll0037	3'UTR	xfp xylulose-5-phosphate/fructose-6-phosphate phosphoketolase	Cytoplasmic	Biosynthesis of cofactors, prosthetic groups, and carriers	Cobalamin, heme, phycobilin and porphyrin	4.99.1.3	CATALYTIC ACTIVITY: Cobalt-sirohydrochlorin + 2 H(+) = sirohydrochlorin + Co(2+).	COFACTOR: Name=[4Fe-4S] cluster; Xref=ChEBI:CHEBI:49883; Evidence={ECO:0000305}; ; Note=Binds 1 [4Fe-4S] cluster per dimer. {ECO:0000305};	cobalamin biosynthetic process [GO:0009236]	4 iron, 4 sulfur cluster binding [GO:0051539]; metal ion binding [GO:0046872]; sirohydrochlorin cobaltochelatase activity [GO:0016852]	NA
δE/δJ	sll0037	CDS	xfp xylulose-5-phosphate/fructose-6-phosphate phosphoketolase	Cytoplasmic	Biosynthesis of cofactors, prosthetic groups, and carriers	Cobalamin, heme, phycobilin and porphyrin	4.99.1.3	CATALYTIC ACTIVITY: Cobalt-sirohydrochlorin + 2 H(+) = sirohydrochlorin + Co(2+).	COFACTOR: Name=[4Fe-4S] cluster; Xref=ChEBI:CHEBI:49883; Evidence={ECO:0000305}; ; Note=Binds 1 [4Fe-4S] cluster per dimer. {ECO:0000305};	cobalamin biosynthetic process [GO:0009236]	4 iron, 4 sulfur cluster binding [GO:0051539]; metal ion binding [GO:0046872]; sirohydrochlorin cobaltochelatase activity [GO:0016852]	NA
δE	sll0099	CDS	precorrin-6y C5, 15-methyltransferase (decarboxylating)	Cytoplasmic	Biosynthesis of cofactors, prosthetic groups, and carriers	Cobalamin, heme, phycobilin and porphyrin	2.1.1.132	NA	NA	GO:0009236 cobalamin biosynthetic process GO:0008152 metabolic process GO:0006400 tRNA modification	GO:0008168 methyltransferase activity GO:0046025 precorrin-6Y C5,15-methyltransferase (decarboxylating) activity GO:0008276 protein methyltransferase activity GO:0008176 tRNA (guanine-N7-)-methyltransferase activity	NA
δE	sll0147	5'UTR	pgmB beta-phosphoglucomutase	CytoplasmicMembrane	Biosynthesis of cofactors, prosthetic groups, and carriers	Carotenoid	NA	NA	NA	NA	oxidoreductase activity [GO:0016491]	NA
δE	sll0250	3'UTR	pantothenate metabolism flavoprotein	Cytoplasmic	Biosynthesis of cofactors, prosthetic groups, and carriers	Pantothenate	4.1.1.36; 6.3.2.5	CATALYTIC ACTIVITY: N-((R)-4'-phosphopantothenoyl)-L-cysteine = pantotheine 4'-phosphate + CO(2).; CATALYTIC ACTIVITY: CTP + (R)-4'-phosphopantothenate + L-cysteine = CMP + diphosphate + N-((R)-4'-phosphopantothenoyl)-L-cysteine.	COFACTOR: Name=FMN; Xref=ChEBI:CHEBI:58210; Evidence={ECO:0000250}; ; Note=Binds 1 FMN per subunit. {ECO:0000250};	coenzyme A biosynthetic process [GO:0015937]; pantothenate catabolic process [GO:0015941]	FMN binding [GO:0010181]; phosphopantothenate--cysteine ligase activity [GO:0004632]; phosphopantothenoylcysteine decarboxylase activity [GO:0004633]	NA
δE	sll0253	CDS	1-alkyl-2-acetylglycerophosphocholine esterase, chlorophyllase activity	Unknown	Biosynthesis of cofactors, prosthetic groups, and carriers	Cobalamin, heme, phycobilin and porphyrin	NA	NA	NA	lipid catabolic process [GO:0016042]	1-alkyl-2-acetylglycerophosphocholine esterase activity [GO:0003847]	NA
δE/δJ	sll0383	CDS	cobalamin biosynthesis protein M	CytoplasmicMembrane	Biosynthesis of cofactors, prosthetic groups, and carriers	NA	NA	NA	NA	GO:0009236 cobalamin biosynthetic process	NA	GO:0016021 integral to membrane
δE	sll0398	CDS	deoxyguanosinetriphosphate triphosphohydrolase	Cytoplasmic	Biosynthesis of cofactors, prosthetic groups, and carriers	Purine ribonucleotide biosynthesis	3.1.5.1	NA	NA	dGTP catabolic process [GO:0006203]; GTP metabolic process [GO:0046039]	dGTPase activity [GO:0008832]; magnesium ion binding [GO:0000287]	NA
δE	sll0578	CDS	phosphoribosylaminoimidazole carboxylase ATPase subunit	CytoplasmicMembrane	Biosynthesis of cofactors, prosthetic groups, and carriers	Purine ribonucleotide biosynthesis	6.3.4.18	CATALYTIC ACTIVITY: ATP + 5-amino-1-(5-phospho-D-ribosyl)imidazole + HCO(3)(-) = ADP + phosphate + 5-carboxyamino-1-(5-phospho-D-ribosyl)imidazole. {ECO:0000255|HAMAP-Rule:MF_01928}.	NA	de novo' IMP biosynthetic process [GO:0006189]; adenine biosynthetic process [GO:0046084]	5-(carboxyamino)imidazole ribonucleotide synthase activity [GO:0034028]; ATP binding [GO:0005524]; metal ion binding [GO:0046872]; phosphoribosylaminoimidazole carboxylase activity [GO:0004638]; phosphoribosylaminoimidazolesuccinocarboxamide synthase activity [GO:0004639]	cytosol [GO:0005829]
δE	sll0603	3'UTR	menaquinone biosynthesis protein MenD	Unknown	Biosynthesis of cofactors, prosthetic groups, and carriers	Menaquinone and ubiquinone	2.2.1.9	CATALYTIC ACTIVITY: Isochorismate + 2-oxoglutarate = 5-enolpyruvoyl-6-hydroxy-2-succinyl-cyclohex-3-ene-1-carboxylate + CO(2). {ECO:0000255|HAMAP-Rule:MF_01659}.	COFACTOR: Name=Mg(2+); Xref=ChEBI:CHEBI:18420; Evidence={ECO:0000255|HAMAP-Rule:MF_01659}; Name=Mn(2+); Xref=ChEBI:CHEBI:29035; Evidence={ECO:0000255|HAMAP-Rule:MF_01659}; ; COFACTOR: Name=thiamine diphosphate; Xref=ChEBI:CHEBI:58937; Evidence={ECO:0000255|HAMAP-Rule:MF_01659}; ; Note=Binds 1 thiamine pyrophosphate per subunit. {ECO:0000255|HAMAP-Rule:MF_01659};	menaquinone biosynthetic process [GO:0009234]; phylloquinone biosynthetic process [GO:0042372]	2-succinyl-5-enolpyruvyl-6-hydroxy-3-cyclohexene-1-carboxylic-acid synthase activity [GO:0070204]; magnesium ion binding [GO:0000287]; manganese ion binding [GO:0030145]; thiamine pyrophosphate binding [GO:0030976]	NA
δE	sll0635	CDS	probable thiamine-phosphate pyrophosphorylase	Cytoplasmic	Biosynthesis of cofactors, prosthetic groups, and carriers	Thiamin	2.5.1.3	CATALYTIC ACTIVITY: 4-amino-2-methyl-5-diphosphomethylpyrimidine + 2-((2R,5Z)-2-carboxy-4-methylthiazol-5(2H)-ylidene)ethyl phosphate = diphosphate + thiamine phosphate + CO(2). {ECO:0000255|HAMAP-Rule:MF_01327}.; CATALYTIC ACTIVITY: 4-amino-2-methyl-5-diphosphomethylpyrimidine + 2-(2-carboxy-4-methylthiazol-5-yl)ethyl phosphate = diphosphate + thiamine phosphate + CO(2). {ECO:0000255|HAMAP-Rule:…	COFACTOR: Name=Mg(2+); Xref=ChEBI:CHEBI:18420; Evidence={ECO:0000255|HAMAP-Rule:MF_01327}; ; Note=Binds 1 Mg(2+) ion per subunit. {ECO:0000255|HAMAP-Rule:MF_01327};	thiamine biosynthetic process [GO:0009228]; thiamine diphosphate biosynthetic process [GO:0009229]	magnesium ion binding [GO:0000287]; thiamine-phosphate diphosphorylase activity [GO:0004789]	cytoplasm [GO:0005737]
δE	sll0660	CDS	pyridoxal phosphate biosynthetic protein PdxA	Cytoplasmic	Biosynthesis of cofactors, prosthetic groups, and carriers	Pyridoxine	1.1.1.262	CATALYTIC ACTIVITY: 4-phosphonooxy-L-threonine + NAD(+) = 3-amino-2-oxopropyl phosphate + CO(2) + NADH.	COFACTOR: Name=a divalent metal cation; Xref=ChEBI:CHEBI:60240; Evidence={ECO:0000255|HAMAP-Rule:MF_00536}; ; Note=Binds 1 divalent metal cation per subunit. {ECO:0000255|HAMAP-Rule:MF_00536};	GO:0055114 oxidation reduction GO:0008615 pyridoxine biosynthetic process	GO:0050570 4-hydroxythreonine-4-phosphate dehydrogenase activity GO:0051287 NAD or NADH binding	GO:0005737 cytoplasm
δE	sll0660	3'UTR	pyridoxal phosphate biosynthetic protein PdxA	Cytoplasmic	Biosynthesis of cofactors, prosthetic groups, and carriers	Pyridoxine	1.1.1.262	CATALYTIC ACTIVITY: 4-phosphonooxy-L-threonine + NAD(+) = 3-amino-2-oxopropyl phosphate + CO(2) + NADH.	COFACTOR: Name=a divalent metal cation; Xref=ChEBI:CHEBI:60240; Evidence={ECO:0000255|HAMAP-Rule:MF_00536}; ; Note=Binds 1 divalent metal cation per subunit. {ECO:0000255|HAMAP-Rule:MF_00536};	GO:0055114 oxidation reduction GO:0008615 pyridoxine biosynthetic process	GO:0050570 4-hydroxythreonine-4-phosphate dehydrogenase activity GO:0051287 NAD or NADH binding	GO:0005737 cytoplasm
δE	sll0660	5'UTR	pyridoxal phosphate biosynthetic protein PdxA	Cytoplasmic	Biosynthesis of cofactors, prosthetic groups, and carriers	Pyridoxine	1.1.1.262	CATALYTIC ACTIVITY: 4-phosphonooxy-L-threonine + NAD(+) = 3-amino-2-oxopropyl phosphate + CO(2) + NADH.	COFACTOR: Name=a divalent metal cation; Xref=ChEBI:CHEBI:60240; Evidence={ECO:0000255|HAMAP-Rule:MF_00536}; ; Note=Binds 1 divalent metal cation per subunit. {ECO:0000255|HAMAP-Rule:MF_00536};	GO:0055114 oxidation reduction GO:0008615 pyridoxine biosynthetic process	GO:0050570 4-hydroxythreonine-4-phosphate dehydrogenase activity GO:0051287 NAD or NADH binding	GO:0005737 cytoplasm
δE	sll0662	3'UTR	4Fe-4S type iron-sulfur protein, probable glutaredoxin	Cytoplasmic	Biosynthesis of cofactors, prosthetic groups, and carriers	Thioredoxin, glutaredoxin, and glutathione	NA	NA	NA	NA	electron carrier activity [GO:0009055]; iron ion binding [GO:0005506]	NA
δE	sll0892	3'UTR	aspartate 1-decarboxylase	Cytoplasmic	Biosynthesis of cofactors, prosthetic groups, and carriers	Pantothenate	4.1.1.11	CATALYTIC ACTIVITY: L-aspartate = beta-alanine + CO(2). {ECO:0000255|HAMAP-Rule:MF_00446}.	COFACTOR: Name=pyruvate; Xref=ChEBI:CHEBI:15361; Evidence={ECO:0000255|HAMAP-Rule:MF_00446}; ; Note=Binds 1 pyruvoyl group covalently per subunit. {ECO:0000255|HAMAP-Rule:MF_00446};	alanine biosynthetic process [GO:0006523]; pantothenate biosynthetic process [GO:0015940]	aspartate 1-decarboxylase activity [GO:0004068]	cytoplasm [GO:0005737]
δE	sll1057	CDS	thioredoxin M	Cytoplasmic	Biosynthesis of cofactors, prosthetic groups, and carriers	Thioredoxin, glutaredoxin, and glutathione	NA	NA	NA	GO:0045454 cell redox homeostasis	NA	NA
δE	sll1057	3'UTR	thioredoxin M	Cytoplasmic	Biosynthesis of cofactors, prosthetic groups, and carriers	Thioredoxin, glutaredoxin, and glutathione	NA	NA	NA	GO:0045454 cell redox homeostasis	NA	NA
δE	sll1237	CDS	N(5)-glutamine methyltransferase	Cytoplasmic	Biosynthesis of cofactors, prosthetic groups, and carriers	Cobalamin, heme, phycobilin and porphyrin	2.1.1.297	CATALYTIC ACTIVITY: S-adenosyl-L-methionine + [peptide chain release factor 1 or 2]-L-glutamine = S-adenosyl-L-homocysteine + [peptide chain release factor 1 or 2]-N(5)-methyl-L-glutamine. {ECO:0000255|HAMAP-Rule:MF_02126}.	NA	peptidyl-glutamine methylation [GO:0018364]	nucleic acid binding [GO:0003676]; protein-glutamine N-methyltransferase activity [GO:0036009]	NA
δE	sll1237	5'UTR	N(5)-glutamine methyltransferase	Cytoplasmic	Biosynthesis of cofactors, prosthetic groups, and carriers	Cobalamin, heme, phycobilin and porphyrin	2.1.1.297	CATALYTIC ACTIVITY: S-adenosyl-L-methionine + [peptide chain release factor 1 or 2]-L-glutamine = S-adenosyl-L-homocysteine + [peptide chain release factor 1 or 2]-N(5)-methyl-L-glutamine. {ECO:0000255|HAMAP-Rule:MF_02126}.	NA	peptidyl-glutamine methylation [GO:0018364]	nucleic acid binding [GO:0003676]; protein-glutamine N-methyltransferase activity [GO:0036009]	NA
δE	sll1249	5'UTR	pantothenate synthetase/cytidylate kinase	Cytoplasmic	Biosynthesis of cofactors, prosthetic groups, and carriers	Pantothenate	6.3.2.1; 2.7.4.14	CATALYTIC ACTIVITY: ATP + (R)-pantoate + beta-alanine = AMP + diphosphate + (R)-pantothenate.; CATALYTIC ACTIVITY: ATP + (d)CMP = ADP + (d)CDP.	NA	pantothenate biosynthetic process [GO:0015940]; pyrimidine nucleotide metabolic process [GO:0006220]	ATP binding [GO:0005524]; cytidylate kinase activity [GO:0004127]; pantoate-beta-alanine ligase activity [GO:0004592]	cytoplasm [GO:0005737]
δE	sll1415	3'UTR	E3.5.1.1 L-asparaginase	Cytoplasmic	Biosynthesis of cofactors, prosthetic groups, and carriers	Nicotinate and nicotinamide	2.7.1.23	CATALYTIC ACTIVITY: ATP + NAD(+) = ADP + NADP(+). {ECO:0000255|HAMAP-Rule:MF_00361}.	COFACTOR: Name=a divalent metal cation; Xref=ChEBI:CHEBI:60240; Evidence={ECO:0000255|HAMAP-Rule:MF_00361};	NAD metabolic process [GO:0019674]; NADP biosynthetic process [GO:0006741]	ATP binding [GO:0005524]; metal ion binding [GO:0046872]; NAD+ kinase activity [GO:0003951]	cytoplasm [GO:0005737]
δE	sll1500	CDS	nicotinate-nucleotide-dimethylbenzimidazole phosphoribosyltransferase	Unknown	Biosynthesis of cofactors, prosthetic groups, and carriers	Cobalamin, heme, phycobilin and porphyrin	NA	NA	NA	cobalamin biosynthetic process [GO:0009236]	nicotinate-nucleotide-dimethylbenzimidazole phosphoribosyltransferase activity [GO:0008939]	NA
δE	sll1541	CDS	Apocarotenoid-15,15-oxygenase (ACO)	Unknown	Biosynthesis of cofactors, prosthetic groups, and carriers	Carotenoid	1.13.11.75	CATALYTIC ACTIVITY: All-trans-8'-apo-beta-carotenal + O(2) = all-trans-retinal + (2E,4E,6E)-2,6-dimethylocta-2,4,6-trienedial. {ECO:0000269|PubMed:15686550}.	COFACTOR: Name=Fe(2+); Xref=ChEBI:CHEBI:29033; Evidence={ECO:0000269|PubMed:15821095}; ; Note=Binds 1 Fe(2+) ion per subunit. {ECO:0000269|PubMed:15821095};	NA	metal ion binding [GO:0046872]; oxidoreductase activity, acting on single donors with incorporation of molecular oxygen, incorporation of two atoms of oxygen [GO:0016702]	NA
δE	sll1643	3'UTR	GST glutathione S-transferase	Unknown	Biosynthesis of cofactors, prosthetic groups, and carriers	Folic acid	6.3.3.2	CATALYTIC ACTIVITY: ATP + 5-formyltetrahydrofolate = ADP + phosphate + 5,10-methenyltetrahydrofolate. {ECO:0000256|RuleBase:RU361279}.	COFACTOR: Name=Mg(2+); Xref=ChEBI:CHEBI:18420; Evidence={ECO:0000256|RuleBase:RU361279};	folic acid-containing compound biosynthetic process [GO:0009396]; tetrahydrofolate interconversion [GO:0035999]	5-formyltetrahydrofolate cyclo-ligase activity [GO:0030272]; ATP binding [GO:0005524]; metal ion binding [GO:0046872]	NA
δE	sll1773	CDS	putative quercetin 2,3-dioxygenase	Cytoplasmic	Biosynthesis of cofactors, prosthetic groups, and carriers	Others	1.13.11.24	CATALYTIC ACTIVITY: Quercetin + O(2) = 2-(3,4-dihydroxybenzoyloxy)-4,6-dihydroxybenzoate + CO + H(+).	COFACTOR: Name=a divalent metal cation; Xref=ChEBI:CHEBI:60240; Evidence={ECO:0000250}; ; Note=Binds 1 divalent metal cation. {ECO:0000250};	NA	metal ion binding [GO:0046872]; quercetin 2,3-dioxygenase activity [GO:0008127]	NA
δE	sll1773	5'UTR	putative quercetin 2,3-dioxygenase	Cytoplasmic	Biosynthesis of cofactors, prosthetic groups, and carriers	Other	1.13.11.24	CATALYTIC ACTIVITY: Quercetin + O(2) = 2-(3,4-dihydroxybenzoyloxy)-4,6-dihydroxybenzoate + CO + H(+).	COFACTOR: Name=a divalent metal cation; Xref=ChEBI:CHEBI:60240; Evidence={ECO:0000250}; ; Note=Binds 1 divalent metal cation. {ECO:0000250};	NA	metal ion binding [GO:0046872]; quercetin 2,3-dioxygenase activity [GO:0008127]	NA
δE	sll1884	3'UTR	coproporphyrinogen III oxidase, anaerobic (oxygen-independent)	Cytoplasmic	Biosynthesis of cofactors, prosthetic groups, and carriers	Cobalamin, heme, phycobilin and porphyrin	1.3.99.22	CATALYTIC ACTIVITY: Coproporphyrinogen-III + 2 S-adenosyl-L-methionine = protoporphyrinogen-IX + 2 CO(2) + 2 L-methionine + 2 5'-deoxyadenosine. {ECO:0000269|PubMed:20194361}.	COFACTOR: Name=[4Fe-4S] cluster; Xref=ChEBI:CHEBI:49883; Evidence={ECO:0000250, ECO:0000305}; ; Note=Binds 1 [4Fe-4S] cluster. The cluster is coordinated with 3 cysteines and an exchangeable S-adenosyl-L-methionine. {ECO:0000250, ECO:0000305};	chlorophyll biosynthetic process [GO:0015995]; porphyrin-containing compound biosynthetic process [GO:0006779]; protoporphyrinogen IX biosynthetic process [GO:0006782]	4 iron, 4 sulfur cluster binding [GO:0051539]; coproporphyrinogen dehydrogenase activity [GO:0051989]; coproporphyrinogen oxidase activity [GO:0004109]; metal ion binding [GO:0046872]	cytoplasm [GO:0005737]
δE	sll1891	5'UTR	cobalt-chelatase subunit CobN-like protein	CytoplasmicMembrane	Biosynthesis of cofactors, prosthetic groups, and carriers	Cobalamin, heme, phycobilin and porphyrin	NA	NA	NA	NA	NA	NA
δE	sll1900	3'UTR	riboflavin biosynthesis protein RibA	Cytoplasmic	Biosynthesis of cofactors, prosthetic groups, and carriers	Riboflavin	4.1.99.12; 3.5.4.25	CATALYTIC ACTIVITY: D-ribulose 5-phosphate = formate + L-3,4-dihydroxybutan-2-one 4-phosphate.; CATALYTIC ACTIVITY: GTP + 3 H(2)O = formate + 2,5-diamino-6-hydroxy-4-(5-phospho-D-ribosylamino)pyrimidine + diphosphate.	COFACTOR: Name=Mg(2+); Xref=ChEBI:CHEBI:18420; Evidence={ECO:0000250}; Name=Mn(2+); Xref=ChEBI:CHEBI:29035; Evidence={ECO:0000250}; ; Note=Binds 2 divalent metal cations per subunit. Magnesium or manganese. {ECO:0000250};; COFACTOR: Name=Zn(2+); Xref=ChEBI:CHEBI:29105; Evidence={ECO:0000250}; ; Note=Binds 1 zinc ion per subunit. {ECO:0000250};	riboflavin biosynthetic process [GO:0009231]	3,4-dihydroxy-2-butanone-4-phosphate synthase activity [GO:0008686]; GTP binding [GO:0005525]; GTP cyclohydrolase II activity [GO:0003935]; magnesium ion binding [GO:0000287]; manganese ion binding [GO:0030145]; zinc ion binding [GO:0008270]	NA
δE	sll1916	CDS	nadD nicotinate-nucleotide adenylyltransferase	CytoplasmicMembrane	Biosynthesis of cofactors, prosthetic groups, and carriers	Nicotinate and nicotinamide	2.7.7.18	CATALYTIC ACTIVITY: ATP + beta-nicotinate-D-ribonucleotide = diphosphate + deamido-NAD(+).	NA	de novo' NAD biosynthetic process from aspartate [GO:0034628]	ATP binding [GO:0005524]; nicotinamide-nucleotide adenylyltransferase activity [GO:0000309]; nicotinate-nucleotide adenylyltransferase activity [GO:0004515]	NA
δE	sll1917	CDS	coproporphyrinogen III oxidase, anaerobic (oxygen-independent)	Cytoplasmic	Biosynthesis of cofactors, prosthetic groups, and carriers	Cobalamin, heme, phycobilin and porphyrin	NA	NA	COFACTOR: Name=[2Fe-2S] cluster; Xref=ChEBI:CHEBI:49601; Evidence={ECO:0000269|PubMed:20194361, ECO:0000305}; ; Note=Binds 1 [2Fe-2S] cluster. Although this protein has sequence motifs typically found in proteins binding the [4Fe-4S]-AdoMet radical-SAM cluster and S-adenosylmethionine, spectroscopic evidence suggests that a [2Fe-2S] cluster is present. {ECO:0000269|PubMed:20194361, ECO:0000305};	porphyrin-containing compound biosynthetic process [GO:0006779]; protoporphyrinogen IX biosynthetic process [GO:0006782]	2 iron, 2 sulfur cluster binding [GO:0051537]; 4 iron, 4 sulfur cluster binding [GO:0051539]; coproporphyrinogen oxidase activity [GO:0004109]; metal ion binding [GO:0046872]	NA
δE	slr0056	5'UTR	chlorophyll a synthase	CytoplasmicMembrane	Biosynthesis of cofactors, prosthetic groups, and carriers	Cobalamin, heme, phycobilin and porphyrin	NA	NA	NA	NA	NA	NA
δE	slr0066	CDS	riboflavin biosynthesis protein RibD	Cytoplasmic	Biosynthesis of cofactors, prosthetic groups, and carriers	Riboflavin	3.5.4.26; 1.1.1.193	CATALYTIC ACTIVITY: 2,5-diamino-6-hydroxy-4-(5-phosphoribosylamino)pyrimidine + H(2)O = 5-amino-6-(5-phosphoribosylamino)uracil + NH(3).; CATALYTIC ACTIVITY: 5-amino-6-(5-phospho-D-ribitylamino)uracil + NADP(+) = 5-amino-6-(5-phospho-D-ribosylamino)uracil + NADPH.	COFACTOR: Name=Zn(2+); Xref=ChEBI:CHEBI:29105; Evidence={ECO:0000250}; ; Note=Binds 1 zinc ion. {ECO:0000250};	riboflavin biosynthetic process [GO:0009231]; RNA modification [GO:0009451]	5-amino-6-(5-phosphoribosylamino)uracil reductase activity [GO:0008703]; diaminohydroxyphosphoribosylaminopyrimidine deaminase activity [GO:0008835]; NADP binding [GO:0050661]; zinc ion binding [GO:0008270]	cytosol [GO:0005829]
δE	slr0066	5'UTR	riboflavin biosynthesis protein RibD	Cytoplasmic	Biosynthesis of cofactors, prosthetic groups, and carriers	Riboflavin	3.5.4.26; 1.1.1.193	CATALYTIC ACTIVITY: 2,5-diamino-6-hydroxy-4-(5-phosphoribosylamino)pyrimidine + H(2)O = 5-amino-6-(5-phosphoribosylamino)uracil + NH(3).; CATALYTIC ACTIVITY: 5-amino-6-(5-phospho-D-ribitylamino)uracil + NADP(+) = 5-amino-6-(5-phospho-D-ribosylamino)uracil + NADPH.	COFACTOR: Name=Zn(2+); Xref=ChEBI:CHEBI:29105; Evidence={ECO:0000250}; ; Note=Binds 1 zinc ion. {ECO:0000250};	riboflavin biosynthetic process [GO:0009231]; RNA modification [GO:0009451]	5-amino-6-(5-phosphoribosylamino)uracil reductase activity [GO:0008703]; diaminohydroxyphosphoribosylaminopyrimidine deaminase activity [GO:0008835]; NADP binding [GO:0050661]; zinc ion binding [GO:0008270]	cytosol [GO:0005829]
δE	slr0216	CDS	bifunctional cobalamin biosynthesis protein CobP	Cytoplasmic	Biosynthesis of cofactors, prosthetic groups, and carriers	Cobalamin, heme, phycobilin and porphyrin	NA	NA	NA	NA	NA	NA
δE	slr0239	CDS	precorrin-4 C11-methyltransferase	Cytoplasmic	Biosynthesis of cofactors, prosthetic groups, and carriers	Cobalamin, heme, phycobilin and porphyrin	NA	NA	NA	NA	NA	NA
δE	slr0252	CDS	probable precorrin-6x reductase	Cytoplasmic	Biosynthesis of cofactors, prosthetic groups, and carriers	Porphyrin and chlorophyll metabolism	NA	NA	NA	GO:0009236 cobalamin biosynthetic process GO:0055114 oxidation reduction	GO:0016994 precorrin-6A reductase activity	NA
δE	slr0400	CDS	queE 7-carboxy-7-deazaguanine synthase	Cytoplasmic	Biosynthesis of cofactors, prosthetic groups, and carriers	Nicotinate and nicotinamide	2.7.1.23	CATALYTIC ACTIVITY: ATP + NAD(+) = ADP + NADP(+). {ECO:0000255|HAMAP-Rule:MF_00361}.	COFACTOR: Name=a divalent metal cation; Xref=ChEBI:CHEBI:60240; Evidence={ECO:0000255|HAMAP-Rule:MF_00361};	NAD metabolic process [GO:0019674]; NADP biosynthetic process [GO:0006741]	ATP binding [GO:0005524]; metal ion binding [GO:0046872]; NAD+ kinase activity [GO:0003951]	cytoplasm [GO:0005737]
δE	slr0400	5'UTR	queE 7-carboxy-7-deazaguanine synthase	Cytoplasmic	Biosynthesis of cofactors, prosthetic groups, and carriers	Nicotinate and nicotinamide	2.7.1.23	CATALYTIC ACTIVITY: ATP + NAD(+) = ADP + NADP(+). {ECO:0000255|HAMAP-Rule:MF_00361}.	COFACTOR: Name=a divalent metal cation; Xref=ChEBI:CHEBI:60240; Evidence={ECO:0000255|HAMAP-Rule:MF_00361};	NAD metabolic process [GO:0019674]; NADP biosynthetic process [GO:0006741]	ATP binding [GO:0005524]; metal ion binding [GO:0046872]; NAD+ kinase activity [GO:0003951]	cytoplasm [GO:0005737]
δE	slr0426	5'UTR	GTP cyclohydrolase I	Cytoplasmic	Biosynthesis of cofactors, prosthetic groups, and carriers	Folic acid	3.5.4.16	CATALYTIC ACTIVITY: GTP + H(2)O = formate + 2-amino-4-hydroxy-6-(erythro-1,2,3-trihydroxypropyl)-dihydropteridine triphosphate.	NA	7,8-dihydroneopterin 3'-triphosphate biosynthetic process [GO:0035998]; one-carbon metabolic process [GO:0006730]; tetrahydrobiopterin biosynthetic process [GO:0006729]; tetrahydrofolate biosynthetic process [GO:0046654]	GTP binding [GO:0005525]; GTP cyclohydrolase I activity [GO:0003934]; zinc ion binding [GO:0008270]	cytoplasm [GO:0005737]
δE	slr0492	CDS	O-succinylbenzoic acid-CoA ligase	Unknown	Biosynthesis of cofactors, prosthetic groups, and carriers	Menaquinone and ubiquinone	NA	NA	NA	NA	NA	NA
δE	slr0502	5'UTR	cobalamin synthesis protein cobW homolog	Cytoplasmic	Biosynthesis of cofactors, prosthetic groups, and carriers	Cobalamin, heme, phycobilin and porphyrin	NA	NA	NA	NA	NA	NA
δE	slr0523	CDS	similar to dethiobiotin synthetase	Cytoplasmic	Biosynthesis of cofactors, prosthetic groups, and carriers	Biotin	6.3.3.3	CATALYTIC ACTIVITY: ATP + 7,8-diaminononanoate + CO(2) = ADP + phosphate + dethiobiotin. {ECO:0000255|HAMAP-Rule:MF_00336}.	COFACTOR: Name=Mg(2+); Xref=ChEBI:CHEBI:18420; Evidence={ECO:0000255|HAMAP-Rule:MF_00336};	biotin biosynthetic process [GO:0009102]	ATP binding [GO:0005524]; dethiobiotin synthase activity [GO:0004141]; magnesium ion binding [GO:0000287]	NA
δE	slr0523	5'UTR	similar to dethiobiotin synthetase	Cytoplasmic	Biosynthesis of cofactors, prosthetic groups, and carriers	Biotin	6.3.3.3	CATALYTIC ACTIVITY: ATP + 7,8-diaminononanoate + CO(2) = ADP + phosphate + dethiobiotin. {ECO:0000255|HAMAP-Rule:MF_00336}.	COFACTOR: Name=Mg(2+); Xref=ChEBI:CHEBI:18420; Evidence={ECO:0000255|HAMAP-Rule:MF_00336};	biotin biosynthetic process [GO:0009102]	ATP binding [GO:0005524]; dethiobiotin synthase activity [GO:0004141]; magnesium ion binding [GO:0000287]	NA
δE	slr0523	3'UTR	similar to dethiobiotin synthetase	Cytoplasmic	Biosynthesis of cofactors, prosthetic groups, and carriers	Biotin	6.3.3.3	CATALYTIC ACTIVITY: ATP + 7,8-diaminononanoate + CO(2) = ADP + phosphate + dethiobiotin. {ECO:0000255|HAMAP-Rule:MF_00336}.	COFACTOR: Name=Mg(2+); Xref=ChEBI:CHEBI:18420; Evidence={ECO:0000255|HAMAP-Rule:MF_00336};	biotin biosynthetic process [GO:0009102]	ATP binding [GO:0005524]; dethiobiotin synthase activity [GO:0004141]; magnesium ion binding [GO:0000287]	NA
δE	slr0526	CDS	3-methyl-2-oxobutanoate hydroxymethyltransferase	Unknown	Biosynthesis of cofactors, prosthetic groups, and carriers	Pantothenate	2.1.2.11	CATALYTIC ACTIVITY: 5,10-methylenetetrahydrofolate + 3-methyl-2-oxobutanoate + H(2)O = tetrahydrofolate + 2-dehydropantoate. {ECO:0000255|HAMAP-Rule:MF_00156}.	COFACTOR: Name=Mg(2+); Xref=ChEBI:CHEBI:18420; Evidence={ECO:0000255|HAMAP-Rule:MF_00156}; ; Note=Binds 1 Mg(2+) ion per subunit. {ECO:0000255|HAMAP-Rule:MF_00156};	pantothenate biosynthetic process [GO:0015940]	3-methyl-2-oxobutanoate hydroxymethyltransferase activity [GO:0003864]; metal ion binding [GO:0046872]	cytoplasm [GO:0005737]
δE	slr0553	CDS	ispH 4-hydroxy-3-methylbut-2-en-1-yl diphosphate reductase	Cytoplasmic	Biosynthesis of cofactors, prosthetic groups, and carriers	Pantothenate	2.7.1.24	CATALYTIC ACTIVITY: ATP + 3'-dephospho-CoA = ADP + CoA.	NA	coenzyme A biosynthetic process [GO:0015937]	ATP binding [GO:0005524]; dephospho-CoA kinase activity [GO:0004140]	cytoplasm [GO:0005737]
δE	slr0642	CDS	folate-biopterin transporter	CytoplasmicMembrane	Biosynthesis of cofactors, prosthetic groups, and carriers	Folic acid	NA	NA	NA	5-formyltetrahydrofolate transport [GO:0015885]; folic acid transport [GO:0015884]; methotrexate transport [GO:0051958]	5-formyltetrahydrofolate transporter activity [GO:0015231]; folic acid transporter activity [GO:0008517]; methotrexate transporter activity [GO:0015350]	integral component of membrane [GO:0016021]; plasma membrane [GO:0005886]
δE	slr0642	5'UTR	folate-biopterin transporter	CytoplasmicMembrane	Biosynthesis of cofactors, prosthetic groups, and carriers	Folic acid	NA	NA	NA	5-formyltetrahydrofolate transport [GO:0015885]; folic acid transport [GO:0015884]; methotrexate transport [GO:0051958]	5-formyltetrahydrofolate transporter activity [GO:0015231]; folic acid transporter activity [GO:0008517]; methotrexate transporter activity [GO:0015350]	integral component of membrane [GO:0016021]; plasma membrane [GO:0005886]
δE	slr0772	3'UTR	light-independent protochlorophyllide reductase subunit ChlB	Cytoplasmic	Biosynthesis of cofactors, prosthetic groups, and carriers	Cobalamin, heme, phycobilin and porphyrin	1.3.7.7	CATALYTIC ACTIVITY: Protochlorophyllide a + reduced ferredoxin + 2 ATP + 2 H(2)O = chlorophyllide a + oxidized ferredoxin + 2 ADP + 2 phosphate. {ECO:0000255|HAMAP-Rule:MF_00353}.	COFACTOR: Name=[4Fe-4S] cluster; Xref=ChEBI:CHEBI:49883; Evidence={ECO:0000255|HAMAP-Rule:MF_00353}; ; Note=Binds 1 [4Fe-4S] cluster per heterodimer. The cluster is bound at the heterodimer interface by residues from both subunits. {ECO:0000255|HAMAP-Rule:MF_00353};	light-independent chlorophyll biosynthetic process [GO:0036068]; photosynthesis, dark reaction [GO:0019685]	4 iron, 4 sulfur cluster binding [GO:0051539]; ATP binding [GO:0005524]; metal ion binding [GO:0046872]; oxidoreductase activity, acting on iron-sulfur proteins as donors [GO:0016730]; oxidoreductase activity, acting on the CH-CH group of donors, iron-sulfur protein as acceptor [GO:0016636]	NA
δE	slr0772	CDS	light-independent protochlorophyllide reductase subunit ChlB	Cytoplasmic	Biosynthesis of cofactors, prosthetic groups, and carriers	Cobalamin, heme, phycobilin and porphyrin	1.3.7.7	CATALYTIC ACTIVITY: Protochlorophyllide a + reduced ferredoxin + 2 ATP + 2 H(2)O = chlorophyllide a + oxidized ferredoxin + 2 ADP + 2 phosphate. {ECO:0000255|HAMAP-Rule:MF_00353}.	COFACTOR: Name=[4Fe-4S] cluster; Xref=ChEBI:CHEBI:49883; Evidence={ECO:0000255|HAMAP-Rule:MF_00353}; ; Note=Binds 1 [4Fe-4S] cluster per heterodimer. The cluster is bound at the heterodimer interface by residues from both subunits. {ECO:0000255|HAMAP-Rule:MF_00353};	light-independent chlorophyll biosynthetic process [GO:0036068]; photosynthesis, dark reaction [GO:0019685]	4 iron, 4 sulfur cluster binding [GO:0051539]; ATP binding [GO:0005524]; metal ion binding [GO:0046872]; oxidoreductase activity, acting on iron-sulfur proteins as donors [GO:0016730]; oxidoreductase activity, acting on the CH-CH group of donors, iron-sulfur protein as acceptor [GO:0016636]	NA
δE	slr0821	CDS	putative sulfur carrier protein, carries sulfur in thiamine and tungsten/molybdenum cofactor biosynthesis	Unknown	Biosynthesis of cofactors, prosthetic groups, and carriers	Molybdopterin	NA	NA	NA	GO:0006790 sulfur metabolic process	NA	NA
δE	slr0821	5'UTR	putative sulfur carrier protein, carries sulfur in thiamine and tungsten/molybdenum cofactor biosynthesis	Unknown	Biosynthesis of cofactors, prosthetic groups, and carriers	Molybdopterin	NA	NA	NA	GO:0006790 sulfur metabolic process	NA	NA
δE	slr0821	3'UTR	putative sulfur carrier protein, carries sulfur in thiamine and tungsten/molybdenum cofactor biosynthesis	Unknown	Biosynthesis of cofactors, prosthetic groups, and carriers	Molybdopterin	NA	NA	NA	GO:0006790 sulfur metabolic process	NA	NA
δE	slr0839	3'UTR	ferrochelatase	Cytoplasmic	Biosynthesis of cofactors, prosthetic groups, and carriers	Cobalamin, heme, phycobilin and porphyrin	4.99.1.1	CATALYTIC ACTIVITY: Protoheme + 2 H(+) = protoporphyrin + Fe(2+).	NA	heme biosynthetic process [GO:0006783]	ferrochelatase activity [GO:0004325]; metal ion binding [GO:0046872]	cytoplasm [GO:0005737]
δE	slr0903	CDS	molybdopterin (MPT) converting factor, subunit 2	Cytoplasmic	Biosynthesis of cofactors, prosthetic groups, and carriers	Molybdopterin	NA	NA	NA	molybdopterin cofactor biosynthetic process [GO:0032324]; Mo-molybdopterin cofactor biosynthetic process [GO:0006777]	molybdopterin synthase activity [GO:0030366]	cytosol [GO:0005829]
δE	slr0917	CDS	7-keto-8-aminopelargonic acid synthetase	Cytoplasmic	Biosynthesis of cofactors, prosthetic groups, and carriers	Biotin	2.3.1.47	CATALYTIC ACTIVITY: Pimeloyl-[acyl-carrier protein] + L-alanine = 8-amino-7-oxononanoate + CO(2) + holo-[acyl-carrier protein].	COFACTOR: Name=pyridoxal 5'-phosphate; Xref=ChEBI:CHEBI:597326; Evidence={ECO:0000250};	biotin biosynthetic process [GO:0009102]	8-amino-7-oxononanoate synthase activity [GO:0008710]; pyridoxal phosphate binding [GO:0030170]	NA
δE	slr0936	CDS	nicotinate-nucleotide pyrophosphorylase	Cytoplasmic	Biosynthesis of cofactors, prosthetic groups, and carriers	Nicotinate and nicotinamide	2.4.2.19	CATALYTIC ACTIVITY: Beta-nicotinate D-ribonucleotide + diphosphate + CO(2) = pyridine-2,3-dicarboxylate + 5-phospho-alpha-D-ribose 1-diphosphate.	NA	NAD biosynthetic process [GO:0009435]; quinolinate catabolic process [GO:0034213]	nicotinate-nucleotide diphosphorylase (carboxylating) activity [GO:0004514]	cytoplasm [GO:0005737]
δE	slr0940	CDS	zeta-carotene desaturase	Unknown	Biosynthesis of cofactors, prosthetic groups, and carriers	Carotenoid	1.3.5.6	CATALYTIC ACTIVITY: 9,9'-di-cis-zeta-carotene + 2 quinone = 7,9,7',9'-tetra-cis-lycopene + 2 quinol.	COFACTOR: Name=NAD(+); Xref=ChEBI:CHEBI:57540; Evidence={ECO:0000305}; Name=NADP(+); Xref=ChEBI:CHEBI:58349; Evidence={ECO:0000305}; Name=FAD; Xref=ChEBI:CHEBI:57692; Evidence={ECO:0000305};	9,9'-di-cis-zeta-carotene desaturation to 7,9,7',9'-tetra-cis-lycopene [GO:0052889]; carotenoid biosynthetic process [GO:0016117]	7,9,9'-tricis-neurosporene:quinone oxidoreductase activity [GO:0052887]; 9,9'-dicis-carotene:quinone oxidoreductase activity [GO:0052886]; carotene 7,8-desaturase activity [GO:0016719]	NA
δE	slr0940	5'UTR	zeta-carotene desaturase	Unknown	Biosynthesis of cofactors, prosthetic groups, and carriers	Carotenoid	1.3.5.6	CATALYTIC ACTIVITY: 9,9'-di-cis-zeta-carotene + 2 quinone = 7,9,7',9'-tetra-cis-lycopene + 2 quinol.	COFACTOR: Name=NAD(+); Xref=ChEBI:CHEBI:57540; Evidence={ECO:0000305}; Name=NADP(+); Xref=ChEBI:CHEBI:58349; Evidence={ECO:0000305}; Name=FAD; Xref=ChEBI:CHEBI:57692; Evidence={ECO:0000305};	9,9'-di-cis-zeta-carotene desaturation to 7,9,7',9'-tetra-cis-lycopene [GO:0052889]; carotenoid biosynthetic process [GO:0016117]	7,9,9'-tricis-neurosporene:quinone oxidoreductase activity [GO:0052887]; 9,9'-dicis-carotene:quinone oxidoreductase activity [GO:0052886]; carotene 7,8-desaturase activity [GO:0016719]	NA
δE	slr1099	CDS	3-octaprenyl-4-hydroxybenzoate carboxy-lyase	Cytoplasmic	Biosynthesis of cofactors, prosthetic groups, and carriers	Ubiquinone biosynthesis	2.5.1.129	NA	NA	NA	GO:0016831 carboxy-lyase activity GO:0003824 catalytic activity	NA
δE	slr1125	CDS	probable glucosyl transferase	Unknown	Biosynthesis of cofactors, prosthetic groups, and carriers	Carotenoid	NA	NA	NA	NA	NA	NA
δE	slr1139	CDS	thioredoxin	Cytoplasmic	Biosynthesis of cofactors, prosthetic groups, and carriers	Thioredoxin, glutaredoxin, and glutathione	NA	NA	NA	cell redox homeostasis [GO:0045454]; glycerol ether metabolic process [GO:0006662]	protein disulfide oxidoreductase activity [GO:0015035]	cell [GO:0005623]
δE	slr1255	CDS	phytoene synthase	Cytoplasmic	Biosynthesis of cofactors, prosthetic groups, and carriers	Carotenoid	2.5.1.99	CATALYTIC ACTIVITY: 2 geranylgeranyl diphosphate = all-trans-phytoene + 2 diphosphate. {ECO:0000269|PubMed:8018713}.	COFACTOR: Name=ATP; Xref=ChEBI:CHEBI:30616; Evidence={ECO:0000250}; ; Note=ATP is required for the transferase activity but it does not seem to be hydrolyzed during the reaction. {ECO:0000250};; COFACTOR: Name=Mn(2+); Xref=ChEBI:CHEBI:29035; Evidence={ECO:0000250}; Name=Mg(2+); Xref=ChEBI:CHEBI:18420; Evidence={ECO:0000250};	carotenoid biosynthetic process [GO:0016117]	geranylgeranyl-diphosphate geranylgeranyltransferase activity [GO:0016767]; metal ion binding [GO:0046872]	NA
δE	slr1255	3'UTR	phytoene synthase	Cytoplasmic	Biosynthesis of cofactors, prosthetic groups, and carriers	Carotenoid	2.5.1.99	CATALYTIC ACTIVITY: 2 geranylgeranyl diphosphate = all-trans-phytoene + 2 diphosphate. {ECO:0000269|PubMed:8018713}.	COFACTOR: Name=ATP; Xref=ChEBI:CHEBI:30616; Evidence={ECO:0000250}; ; Note=ATP is required for the transferase activity but it does not seem to be hydrolyzed during the reaction. {ECO:0000250};; COFACTOR: Name=Mn(2+); Xref=ChEBI:CHEBI:29035; Evidence={ECO:0000250}; Name=Mg(2+); Xref=ChEBI:CHEBI:18420; Evidence={ECO:0000250};	carotenoid biosynthetic process [GO:0016117]	geranylgeranyl-diphosphate geranylgeranyltransferase activity [GO:0016767]; metal ion binding [GO:0046872]	NA
δE	slr1293	CDS	similar to phytoene dehydrogenase	CytoplasmicMembrane	Biosynthesis of cofactors, prosthetic groups, and carriers	Carotenoid	NA	NA	NA	NA	oxidoreductase activity [GO:0016491]	NA
δE	slr1395	CDS	putative heme-degrading protein	CytoplasmicMembrane	Biosynthesis of cofactors, prosthetic groups, and carriers	Cobalamin, heme, phycobilin and porphyrin	NA	NA	NA	NA	NA	NA
δE	slr1395	5'UTR	putative heme-degrading protein	CytoplasmicMembrane	Biosynthesis of cofactors, prosthetic groups, and carriers	Cobalamin, heme, phycobilin and porphyrin	NA	NA	NA	NA	NA	NA
δE	slr1467	5'UTR	precorrin isomerase	Unknown	Biosynthesis of cofactors, prosthetic groups, and carriers	Cobalamin, heme, phycobilin and porphyrin	NA	NA	NA	cobalamin biosynthetic process [GO:0009236]	precorrin-8X methylmutase activity [GO:0016993]	NA
δE	slr1538	CDS	cobalamin biosynthesis protein D	CytoplasmicMembrane	Biosynthesis of cofactors, prosthetic groups, and carriers	Cobalamin, heme, phycobilin and porphyrin	2.1.1.195	CATALYTIC ACTIVITY: Cobalt-precorrin-5B + S-adenosyl-L-methionine = cobalt-precorrin-6A + S-adenosyl-L-homocysteine. {ECO:0000255|HAMAP-Rule:MF_00787}.	NA	cobalamin biosynthetic process [GO:0009236]; corrin biosynthetic process [GO:0046140]	methyltransferase activity [GO:0008168]	NA
δE	slr1562	CDS	glutaredoxin	Unknown	Biosynthesis of cofactors, prosthetic groups, and carriers	Thioredoxin, glutaredoxin, and glutathione	NA	NA	NA	cell redox homeostasis [GO:0045454]	electron carrier activity [GO:0009055]; protein disulfide oxidoreductase activity [GO:0015035]	cell [GO:0005623]
δE	slr1706	CDS	dihydroflavonol 4-reductase	Cytoplasmic	Biosynthesis of cofactors, prosthetic groups, and carriers	Others	1.1.1.219	CATALYTIC ACTIVITY: Cis-3,4-leucopelargonidin + NADP(+) = (+)-dihydrokaempferol + NADPH.	NA	flavonoid biosynthetic process [GO:0009813]	coenzyme binding [GO:0050662]; dihydrokaempferol 4-reductase activity [GO:0045552]	NA
δE	slr1742	5'UTR	probable cobyric acid synthase	Cytoplasmic	Biosynthesis of cofactors, prosthetic groups, and carriers	Cobalamin, heme, phycobilin and porphyrin	NA	NA	NA	cobalamin biosynthetic process [GO:0009236]	catalytic activity [GO:0003824]	NA
δE	slr1777	CDS	magnesium protoporphyrin IX chelatase subunit D	Cytoplasmic	Biosynthesis of cofactors, prosthetic groups, and carriers	Cobalamin, heme, phycobilin and porphyrin	6.6.1.1	CATALYTIC ACTIVITY: ATP + protoporphyrin IX + Mg(2+) + H(2)O = ADP + phosphate + Mg-protoporphyrin IX + 2 H(+).	NA	chlorophyll biosynthetic process [GO:0015995]; photosynthesis [GO:0015979]	ATP binding [GO:0005524]; magnesium chelatase activity [GO:0016851]	NA
δE	slr1787	CDS	thiamine-monophosphate kinase	Unknown	Biosynthesis of cofactors, prosthetic groups, and carriers	Thiamin	2.7.4.16	CATALYTIC ACTIVITY: ATP + thiamine phosphate = ADP + thiamine diphosphate. {ECO:0000256|HAMAP-Rule:MF_02128}.	NA	thiamine biosynthetic process [GO:0009228]; thiamine diphosphate biosynthetic process [GO:0009229]	ATP binding [GO:0005524]; magnesium ion binding [GO:0000287]; thiamine-phosphate kinase activity [GO:0009030]	NA
δE	slr1879	CDS	precorrin-2 methyltransferase	Cytoplasmic	Biosynthesis of cofactors, prosthetic groups, and carriers	Cobalamin, heme, phycobilin and porphyrin	NA	NA	NA	NA	NA	NA
δE	slr1882	CDS	riboflavin biosynthesis protein RibF	Cytoplasmic	Biosynthesis of cofactors, prosthetic groups, and carriers	Riboflavin	2.7.1.26; 2.7.7.2	CATALYTIC ACTIVITY: ATP + riboflavin = ADP + FMN.; CATALYTIC ACTIVITY: ATP + FMN = diphosphate + FAD.	NA	FAD biosynthetic process [GO:0006747]; FMN biosynthetic process [GO:0009398]; riboflavin biosynthetic process [GO:0009231]	ATP binding [GO:0005524]; FMN adenylyltransferase activity [GO:0003919]; riboflavin kinase activity [GO:0008531]	NA
δE	slr2026	CDS	dihydropteroate synthase	Cytoplasmic	Biosynthesis of cofactors, prosthetic groups, and carriers	Folic acid	2.5.1.15	CATALYTIC ACTIVITY: 6-hydroxymethyl-7,8-dihydropterin diphosphate + 4-aminobenzoate = diphosphate + dihydropteroate. {ECO:0000250|UniProtKB:P0AC13}.	COFACTOR: Name=Mg(2+); Xref=ChEBI:CHEBI:18420; Evidence={ECO:0000250|UniProtKB:P0AC13};	folic acid biosynthetic process [GO:0046656]; tetrahydrofolate biosynthetic process [GO:0046654]	dihydropteroate synthase activity [GO:0004156]; metal ion binding [GO:0046872]	NA
δE	ssl2296	3'UTR	pterin-4a-carbinolamine dehydratase	Unknown	Biosynthesis of cofactors, prosthetic groups, and carriers	Others	4.2.1.96	CATALYTIC ACTIVITY: (6R)-6-(L-erythro-1,2-dihydroxypropyl)-5,6,7,8-tetrahydro-4a-hydroxypterin = (6R)-6-(L-erythro-1,2-dihydroxypropyl)-7,8-dihydro-6H-pterin + H(2)O.	NA	tetrahydrobiopterin biosynthetic process [GO:0006729]	4-alpha-hydroxytetrahydrobiopterin dehydratase activity [GO:0008124]	NA
δE	ssr1527	CDS	probable molybdopterin [MPT] converting factor, subunit 1	Unknown	Biosynthesis of cofactors, prosthetic groups, and carriers	Molybdopterin	NA	NA	NA	GO:0006777 Mo-molybdopterin cofactor biosynthetic process GO:0006790 sulfur metabolic process	NA	NA
δE	sll0207	5'UTR	glucose-1-phosphate thymidylyltransferase	Cytoplasmic	Cell envelope	Surface polysaccharides, lipopolysaccharides and antigens	NA	NA	NA	NA	NA	NA
δE	sll1395	CDS	dTDP-6-deoxy-L-mannose-dehydrogenase	Cytoplasmic	Cell envelope	Surface polysaccharides, lipopolysaccharides and antigens	NA	NA	NA	NA	NA	NA
δE	sll1535	3'UTR	putative sugar transferase	CytoplasmicMembrane	Cell envelope	Surface polysaccharides, lipopolysaccharides and antigens	NA	NA	NA	NA	NA	NA
δE	sll1550	3'UTR	probable porin; major outer membrane protein	Unknown	Cell envelope	Membranes, lipoproteins, and porins	NA	NA	NA	NA	transporter activity [GO:0005215]	integral component of membrane [GO:0016021]
δE	slr0191	5'UTR	amidase enhancer, periplasmic protein	Unknown	Cell envelope	Murein sacculus and peptidoglycan	NA	NA	NA	NA	NA	NA
δE	slr0495	CDS	HetI protein homolog	Unknown	Cell envelope	NA	NA	NA	NA	GO:0006633 fatty acid biosynthetic process GO:0009059 macromolecule biosynthetic process	GO:0008897 holo-[acyl-carrier-protein] synthase activity GO:0000287 magnesium ion binding	NA
δE	slr0528	5'UTR	UDP-N-acetylmuramoylalanyl-D-glutamate--2, 6-diaminopimelate ligase	Cytoplasmic	Cell envelope	Murein sacculus and peptidoglycan	6.3.2.13	CATALYTIC ACTIVITY: ATP + UDP-N-acetyl-alpha-D-muramoyl-L-alanyl-D-glutamate + meso-2,6-diaminoheptanedioate = ADP + phosphate + UDP-N-acetyl-alpha-D-muramoyl-L-alanyl-D-gamma-glutamyl-meso-2,6-diaminoheptanedioate. {ECO:0000255|HAMAP-Rule:MF_00208}.	COFACTOR: Name=Mg(2+); Xref=ChEBI:CHEBI:18420; Evidence={ECO:0000255|HAMAP-Rule:MF_00208};	cell cycle [GO:0007049]; cell division [GO:0051301]; cell wall organization [GO:0071555]; peptidoglycan biosynthetic process [GO:0009252]; regulation of cell shape [GO:0008360]	ATP binding [GO:0005524]; UDP-N-acetylmuramoylalanyl-D-glutamate-2,6-diaminopimelate ligase activity [GO:0008765]	cytoplasm [GO:0005737]
δE	slr0819	CDS	apolipoprotein N-acyltransferase	CytoplasmicMembrane	Cell envelope	Membranes, lipoproteins, and porins	2.3.1.-	NA	NA	lipoprotein biosynthetic process [GO:0042158]; nitrogen compound metabolic process [GO:0006807]	hydrolase activity, acting on carbon-nitrogen (but not peptide) bonds [GO:0016810]; N-acyltransferase activity [GO:0016410]	integral component of membrane [GO:0016021]; plasma membrane [GO:0005886]
δE	slr0827	CDS	alanine racemase	Cytoplasmic	Cell envelope	Murein sacculus and peptidoglycan	5.1.1.1	CATALYTIC ACTIVITY: L-alanine = D-alanine. {ECO:0000255|HAMAP-Rule:MF_01201}.	COFACTOR: Name=pyridoxal 5'-phosphate; Xref=ChEBI:CHEBI:597326; Evidence={ECO:0000255|HAMAP-Rule:MF_01201};	D-alanine biosynthetic process [GO:0030632]	alanine racemase activity [GO:0008784]; pyridoxal phosphate binding [GO:0030170]	NA
δE	slr0827	5'UTR	alanine racemase	Cytoplasmic	Cell envelope	Murein sacculus and peptidoglycan	5.1.1.1	CATALYTIC ACTIVITY: L-alanine = D-alanine. {ECO:0000255|HAMAP-Rule:MF_01201}.	COFACTOR: Name=pyridoxal 5'-phosphate; Xref=ChEBI:CHEBI:597326; Evidence={ECO:0000255|HAMAP-Rule:MF_01201};	D-alanine biosynthetic process [GO:0030632]	alanine racemase activity [GO:0008784]; pyridoxal phosphate binding [GO:0030170]	NA
δE	slr1118	CDS	probable UDP-N-acetyl-D-mannosaminuronic acid transferase	CytoplasmicMembrane	Cell envelope	Surface polysaccharides, lipopolysaccharides and antigens	2.4.1.187	NA	NA	GO:0009058 biosynthetic process	NA	NA
δE	slr1118	5'UTR	probable UDP-N-acetyl-D-mannosaminuronic acid transferase	CytoplasmicMembrane	Cell envelope	Surface polysaccharides, lipopolysaccharides and antigens	2.4.1.187	NA	NA	GO:0009058 biosynthetic process	NA	NA
δE	slr1179	CDS	Anhydro-N-acetylmuramic acid kinase (anmK)	Cytoplasmic	Cell envelope	Murein sacculus and peptidoglycan	2.7.1.170	CATALYTIC ACTIVITY: ATP + 1,6-anhydro-N-acetyl-beta-muramate + H(2)O = ADP + N-acetylmuramate 6-phosphate. {ECO:0000255|HAMAP-Rule:MF_01270}.	NA	1,6-anhydro-N-acetyl-beta-muramic acid catabolic process [GO:0097175]; amino sugar metabolic process [GO:0006040]; carbohydrate metabolic process [GO:0005975]; peptidoglycan turnover [GO:0009254]	ATP binding [GO:0005524]; kinase activity [GO:0016301]; phosphotransferase activity, alcohol group as acceptor [GO:0016773]	NA
δE	slr1179	3'UTR	Anhydro-N-acetylmuramic acid kinase (anmK)	Cytoplasmic	Cell envelope	Murein sacculus and peptidoglycan	2.7.1.170	CATALYTIC ACTIVITY: ATP + 1,6-anhydro-N-acetyl-beta-muramate + H(2)O = ADP + N-acetylmuramate 6-phosphate. {ECO:0000255|HAMAP-Rule:MF_01270}.	NA	1,6-anhydro-N-acetyl-beta-muramic acid catabolic process [GO:0097175]; amino sugar metabolic process [GO:0006040]; carbohydrate metabolic process [GO:0005975]; peptidoglycan turnover [GO:0009254]	ATP binding [GO:0005524]; kinase activity [GO:0016301]; phosphotransferase activity, alcohol group as acceptor [GO:0016773]	NA
δE	slr1677	CDS	cbiL nickel transport protein	CytoplasmicMembrane	Cell envelope	Surface polysaccharides, lipopolysaccharides and antigens	NA	NA	NA	lipid A biosynthetic process [GO:0009245]	phospholipid binding [GO:0005543]	cytosol [GO:0005829]
δE	slr1874	5'UTR	D-alanine--D-alanine ligase	Cytoplasmic	Cell envelope	Murein sacculus and peptidoglycan	6.3.2.4	CATALYTIC ACTIVITY: ATP + 2 D-alanine = ADP + phosphate + D-alanyl-D-alanine. {ECO:0000255|HAMAP-Rule:MF_00047}.	COFACTOR: Name=Mg(2+); Xref=ChEBI:CHEBI:18420; Evidence={ECO:0000250}; Name=Mn(2+); Xref=ChEBI:CHEBI:29035; Evidence={ECO:0000250}; ; Note=Binds 2 magnesium or manganese ions per subunit. {ECO:0000250};	cell wall organization [GO:0071555]; peptidoglycan biosynthetic process [GO:0009252]; regulation of cell shape [GO:0008360]	ATP binding [GO:0005524]; D-alanine-D-alanine ligase activity [GO:0008716]; magnesium ion binding [GO:0000287]; manganese ion binding [GO:0030145]	cytoplasm [GO:0005737]
δE	slr2114	CDS	perosamine synthetase	Cytoplasmic	Cell envelope	Surface polysaccharides, lipopolysaccharides and antigens	NA	NA	NA	NA	NA	NA
δE	sll0057	5'UTR	heat shock protein GrpE	Cytoplasmic	Cellular processes	Chaperones	NA	NA	NA	protein folding [GO:0006457]	adenyl-nucleotide exchange factor activity [GO:0000774]	cytoplasm [GO:0005737]
δE	sll0154	3'UTR	putative gluconeogenesis factor	CytoplasmicMembrane	Cellular processes	Cell division	NA	NA	NA	regulation of cell shape [GO:0008360]	NA	cytoplasm [GO:0005737]
δE	sll0288	CDS	septum site-determining protein MinC	Unknown	Cellular processes	Cell division	NA	NA	NA	barrier septum site selection [GO:0000918]; cell morphogenesis [GO:0000902]; regulation of cell cycle [GO:0051726]	NA	NA
δE	sll0716	CDS	leader peptidase I (signal peptidase I)	CytoplasmicMembrane	Cellular processes	Protein and peptide secretion	3.4.21.89	CATALYTIC ACTIVITY: Cleavage of hydrophobic, N-terminal signal or leader sequences from secreted and periplasmic proteins.	NA	signal peptide processing [GO:0006465]	serine-type endopeptidase activity [GO:0004252]	integral component of membrane [GO:0016021]; plasma membrane [GO:0005886]
δE	sll0716	5'UTR	leader peptidase I (signal peptidase I)	CytoplasmicMembrane	Cellular processes	Protein and peptide secretion	3.4.21.89	CATALYTIC ACTIVITY: Cleavage of hydrophobic, N-terminal signal or leader sequences from secreted and periplasmic proteins.	NA	signal peptide processing [GO:0006465]	serine-type endopeptidase activity [GO:0004252]	integral component of membrane [GO:0016021]; plasma membrane [GO:0005886]
δE	sll0720	CDS	RTX toxin activating protein homolog	Cytoplasmic	Cellular processes	NA	NA	NA	NA	GO:0009404 toxin metabolic process	GO:0008415 acyltransferase activity	GO:0005737 cytoplasm
δE	sll0755	CDS	thioredoxin peroxidase	Cytoplasmic	Cellular processes	Detoxification	1.11.1.15	CATALYTIC ACTIVITY: 2 R'-SH + ROOH = R'-S-S-R' + H(2)O + ROH.	NA	NA	peroxidase activity [GO:0004601]; peroxiredoxin activity [GO:0051920]	NA
δE	sll0897	5'UTR	DnaJ protein, heat shock protein 40, molecular chaperone	Cytoplasmic	Cellular processes	Chaperones	NA	NA	COFACTOR: Name=Zn(2+); Xref=ChEBI:CHEBI:29105; Evidence={ECO:0000255|HAMAP-Rule:MF_01152}; ; Note=Binds 2 Zn(2+) ions per monomer. {ECO:0000255|HAMAP-Rule:MF_01152};	DNA replication [GO:0006260]; protein folding [GO:0006457]; response to heat [GO:0009408]	ATP binding [GO:0005524]; zinc ion binding [GO:0008270]	cytoplasm [GO:0005737]
δJ	sll1384	5'UTR	similar to DnaJ protein	Unknown	Cellular processes	Chaperones	NA	NA	NA	NA	NA	NA
δE	sll1632	CDS	E3.5.2.10 creatinine amidohydrolase	Unknown	Cellular processes	Cell division	NA	NA	NA	NA	NA	integral component of membrane [GO:0016021]
δE	sll1632	3'UTR	E3.5.2.10 creatinine amidohydrolase	Unknown	Cellular processes	Cell division	NA	NA	NA	NA	NA	integral component of membrane [GO:0016021]
δE	sll1632	5'UTR	E3.5.2.10 creatinine amidohydrolase	Unknown	Cellular processes	Cell division	NA	NA	NA	NA	NA	integral component of membrane [GO:0016021]
δE	sll1933	3'UTR	DnaJ protein, heat shock protein 40, molecular chaperone	Cytoplasmic	Cellular processes	Chaperones	NA	NA	COFACTOR: Name=Zn(2+); Xref=ChEBI:CHEBI:29105; Evidence={ECO:0000250}; ; Note=Binds 2 Zn(2+) ions per monomer. {ECO:0000250};	DNA replication [GO:0006260]; protein folding [GO:0006457]	NA	cytoplasm [GO:0005737]
δE	slr0072	3'UTR	glucose inhibited division protein B	Cytoplasmic	Cellular processes	Cell division	2.1.1.-	NA	NA	NA	rRNA (guanine-N7-)-methyltransferase activity [GO:0070043]	cytoplasm [GO:0005737]
δJ	slr0374	CDS	cell division cycle protein	CytoplasmicMembrane	Cellular processes	Cell division	NA	NA	NA	GO:0051301 cell division	GO:0005524 ATP binding GO:0017111 nucleoside-triphosphatase activity GO:0000166 nucleotide binding	NA
δJ	slr0374	3'UTR	cell division cycle protein	CytoplasmicMembrane	Cellular processes	Cell division	NA	NA	NA	GO:0051301 cell division	GO:0005524 ATP binding GO:0017111 nucleoside-triphosphatase activity GO:0000166 nucleotide binding	NA
δE	slr0399	CDS	chaperon-like protein for quinone binding in photosystem II	Cytoplasmic	Cellular processes	Chaperones	NA	NA	NA	NA	NA	NA
δE	slr1120	CDS	type 4 prepilin-like proteins leader peptide processing enzyme	CytoplasmicMembrane	Cellular processes	Chemotaxis	3.4.23.43; 2.1.1.-	CATALYTIC ACTIVITY: Typically cleaves a -Gly-|-Phe- bond to release an N-terminal, basic peptide of 5-8 residues from type IV prepilin, and then N-methylates the new N-terminal amino group, the methyl donor being S-adenosyl-L-methionine.	NA	NA	aspartic-type endopeptidase activity [GO:0004190]; methyltransferase activity [GO:0008168]	integral component of membrane [GO:0016021]; plasma membrane [GO:0005886]
δE	slr1366	CDS	lipoprotein signal peptidase (signal peptidase II)	CytoplasmicMembrane	Cellular processes	Protein and peptide secretion	3.4.23.36	CATALYTIC ACTIVITY: Release of signal peptides from bacterial membrane prolipoproteins. Hydrolyzes -Xaa-Yaa-Zaa-|-(S,diacylglyceryl)Cys-, in which Xaa is hydrophobic (preferably Leu), and Yaa (Ala or Ser) and Zaa (Gly or Ala) have small, neutral side chains.	NA	NA	aspartic-type endopeptidase activity [GO:0004190]	integral component of membrane [GO:0016021]; plasma membrane [GO:0005886]
δE	slr1377	CDS	leader peptidase I (signal peptidase I)	CytoplasmicMembrane	Cellular processes	Protein and peptide secretion	3.4.21.89	CATALYTIC ACTIVITY: Cleavage of hydrophobic, N-terminal signal or leader sequences from secreted and periplasmic proteins.	NA	signal peptide processing [GO:0006465]	serine-type endopeptidase activity [GO:0004252]	integral component of membrane [GO:0016021]; plasma membrane [GO:0005886]
δE	slr1531	3'UTR	signal recognition particle protein	CytoplasmicMembrane	Cellular processes	Protein and peptide secretion	NA	NA	NA	SRP-dependent cotranslational protein targeting to membrane [GO:0006614]	7S RNA binding [GO:0008312]; GTPase activity [GO:0003924]; GTP binding [GO:0005525]	signal recognition particle, endoplasmic reticulum targeting [GO:0005786]
δE	slr1531	5'UTR	signal recognition particle protein	CytoplasmicMembrane	Cellular processes	Protein and peptide secretion	NA	NA	NA	SRP-dependent cotranslational protein targeting to membrane [GO:0006614]	7S RNA binding [GO:0008312]; GTPase activity [GO:0003924]; GTP binding [GO:0005525]	signal recognition particle, endoplasmic reticulum targeting [GO:0005786]
δE	slr1577	CDS	segregation and condensation protein B	Unknown	Cellular processes	Cell division	NA	NA	NA	cell division [GO:0051301]; chromosome separation [GO:0051304]	NA	cytoplasm [GO:0005737]
δE	slr1600	5'UTR	putative molecular chaperone activity	Cytoplasmic	Cellular processes	Chaperones	NA	NA	NA	NA	NA	NA
δJ	slr6037	CDS	arsenate reductase	Cytoplasmic	Cellular processes	Detoxification	1.20.4.1	CATALYTIC ACTIVITY: Arsenate + glutaredoxin = arsenite + glutaredoxin disulfide + H(2)O.	NA	NA	arsenate reductase (glutaredoxin) activity [GO:0008794]	NA
δE	ssl0546	3'UTR	septum site-determining protein MinE	Cytoplasmic	Cellular processes	Cell division	NA	NA	NA	cell cycle [GO:0007049]; cell division [GO:0051301]; regulation of barrier septum assembly [GO:0032955]	NA	NA
δE	ssr3122	3'UTR	putative cell cycle/cell morphology regulator	Unknown	Cellular processes	Cell division	NA	NA	NA	NA	NA	NA
δE	sll0220	5'UTR	L-glutamine:D-fructose-6-P amidotransferase	Cytoplasmic	Central intermediary metabolism	Amino sugars	2.6.1.16	CATALYTIC ACTIVITY: L-glutamine + D-fructose 6-phosphate = L-glutamate + D-glucosamine 6-phosphate. {ECO:0000255|HAMAP-Rule:MF_00164}.	NA	fructose 6-phosphate metabolic process [GO:0006002]; glutamine metabolic process [GO:0006541]; protein N-linked glycosylation [GO:0006487]; UDP-N-acetylglucosamine metabolic process [GO:0006047]	carbohydrate binding [GO:0030246]; glutamine-fructose-6-phosphate transaminase (isomerizing) activity [GO:0004360]	cytosol [GO:0005829]
δE	sll0290	5'UTR	polyphosphate kinase	CytoplasmicMembrane	Central intermediary metabolism	Phosphorus compounds	2.7.4.1	CATALYTIC ACTIVITY: ATP + (phosphate)(n) = ADP + (phosphate)(n+1). {ECO:0000255|HAMAP-Rule:MF_00347}.	NA	polyphosphate biosynthetic process [GO:0006799]	ATP binding [GO:0005524]; polyphosphate kinase activity [GO:0008976]	polyphosphate kinase complex [GO:0009358]
δE	sll1004	CDS	probable glycosyltransferase, involved in polysaccharide transmembrane transport	CytoplasmicMembrane	Central intermediary metabolism	Polysaccharides and glycoproteins	NA	NA	NA	NA	transferase activity, transferring glycosyl groups [GO:0016757]	integral component of membrane [GO:0016021]
δE	sll1004	5'UTR	probable glycosyltransferase, involved in polysaccharide transmembrane transport	CytoplasmicMembrane	Central intermediary metabolism	Polysaccharides and glycoproteins	NA	NA	NA	NA	transferase activity, transferring glycosyl groups [GO:0016757]	integral component of membrane [GO:0016021]
δE	sll1540	CDS	dolichyl-phosphate-mannose synthase	CytoplasmicMembrane	Central intermediary metabolism	Polysaccharides and glycoproteins	NA	NA	NA	NA	NA	NA
δE/δJ	sll1566	CDS	glucosylglycerolphosphate synthase	Cytoplasmic	Central intermediary metabolism	Polysaccharides and glycoproteins	2.4.1.213	CATALYTIC ACTIVITY: ADP-alpha-D-glucose + sn-glycerol 3-phosphate = 2-(alpha-D-glucopyranosyl)-sn-glycerol 3-phosphate + ADP. {ECO:0000269|PubMed:9733686}.	NA	glucosylglycerol biosynthetic process [GO:0051473]; trehalose biosynthetic process [GO:0005992]	glucosylglycerol-phosphate synthase activity [GO:0033828]	cytoplasm [GO:0005737]
δE	slr0237	5'UTR	glycogen operon protein GlgX homolog	Cytoplasmic	Central intermediary metabolism	Polysaccharides and glycoproteins	NA	NA	NA	NA	NA	NA
δE	slr0820	5'UTR	probable glycosyltransferase	CytoplasmicMembrane	Central intermediary metabolism	Polysaccharides and glycoproteins	NA	NA	NA	NA	transferase activity [GO:0016740]	integral component of membrane [GO:0016021]
δE	slr1050	CDS	uvrD DNA helicase II / ATP-dependent DNA helicase PcrA	CytoplasmicMembrane	Central intermediary metabolism	Polysaccharides and glycoproteins	NA	NA	NA	cell wall mannoprotein biosynthetic process [GO:0000032]; chain elongation of O-linked mannose residue [GO:0044845]; protein O-linked mannosylation [GO:0035269]	mannosyltransferase activity [GO:0000030]	integral component of membrane [GO:0016021]
δE	slr1219	CDS	urease accessory protein E	Cytoplasmic	Central intermediary metabolism	Other	NA	NA	NA	NA	NA	NA
δE	slr1256	5'UTR	urease gamma subunit	Cytoplasmic	Central intermediary metabolism	Other	3.5.1.5	CATALYTIC ACTIVITY: Urea + H(2)O = CO(2) + 2 NH(3). {ECO:0000255|HAMAP-Rule:MF_00739}.	NA	urea catabolic process [GO:0043419]	nickel cation binding [GO:0016151]; urease activity [GO:0009039]	cytoplasm [GO:0005737]
δE	slr1363	5'UTR	putative polyphosphate AMP phosphotransferase	Cytoplasmic	Central intermediary metabolism	Phosphorus compounds	NA	NA	NA	polyphosphate metabolic process [GO:0006797]	polyphosphate:AMP phosphotransferase activity [GO:0043751]	NA
δJ	slr1367	3'UTR	glycogen phosphorylase	Cytoplasmic	Central intermediary metabolism	Polysaccharides and glycoproteins	NA	NA	NA	NA	NA	NA
δE	slr1566	CDS	nucleotide-diphospho-sugar transferase, polysaccharide synthase and transmembrane transport	CytoplasmicMembrane	Central intermediary metabolism	Polysaccharides and glycoproteins	NA	NA	NA	UDP-glucose metabolic process [GO:0006011]	transferase activity, transferring hexosyl groups [GO:0016758]	integral component of membrane [GO:0016021]
δE	slr1566	3'UTR	nucleotide-diphospho-sugar transferase, polysaccharide synthase and transmembrane transport	CytoplasmicMembrane	Central intermediary metabolism	Polysaccharides and glycoproteins	NA	NA	NA	UDP-glucose metabolic process [GO:0006011]	transferase activity, transferring hexosyl groups [GO:0016758]	integral component of membrane [GO:0016021]
δE	slr2122	CDS	probable glycosyltransferase, involved in polysaccharide transmembrane transport	Cytoplasmic	Central intermediary metabolism	Polysaccharides and glycoproteins	NA	NA	NA	NA	NA	cytosol [GO:0005829]
δE	slr5056	CDS	probable glycosyltransferase, involved in polysaccharide transmembrane transport	CytoplasmicMembrane	Central intermediary metabolism	Polysaccharides and glycoproteins	NA	NA	NA	dolichol metabolic process [GO:0019348]; GPI anchor biosynthetic process [GO:0006506]; protein N-linked glycosylation [GO:0006487]; protein O-linked mannosylation [GO:0035269]	dolichyl-phosphate beta-D-mannosyltransferase activity [GO:0004582]; dolichyl-phosphate-mannose-protein mannosyltransferase activity [GO:0004169]	integral component of membrane [GO:0016021]
δE	slr5056	5'UTR	probable glycosyltransferase, involved in polysaccharide transmembrane transport	CytoplasmicMembrane	Central intermediary metabolism	Polysaccharides and glycoproteins	NA	NA	NA	dolichol metabolic process [GO:0019348]; GPI anchor biosynthetic process [GO:0006506]; protein N-linked glycosylation [GO:0006487]; protein O-linked mannosylation [GO:0035269]	dolichyl-phosphate beta-D-mannosyltransferase activity [GO:0004582]; dolichyl-phosphate-mannose-protein mannosyltransferase activity [GO:0004169]	integral component of membrane [GO:0016021]
δE	sll0377	CDS	transcription-repair coupling factor	Cytoplasmic	DNA replication, restriction, modification, recombination, and repair	NA	3.6.4.-	NA	NA	regulation of transcription, DNA-templated [GO:0006355]; transcription-coupled nucleotide-excision repair, DNA damage recognition [GO:0000716]	ATP binding [GO:0005524]; damaged DNA binding [GO:0003684]; helicase activity [GO:0004386]	cytoplasm [GO:0005737]
δE	sll0709	5'UTR	putative endonuclease	Cytoplasmic	DNA replication, restriction, modification, recombination, and repair	NA	NA	NA	NA	NA	NA	NA
δE	sll0709	CDS	putative endonuclease	Cytoplasmic	DNA replication, restriction, modification, recombination, and repair	NA	NA	NA	NA	NA	NA	NA
δE	sll0766	CDS	DNA repair protein RadC	Cytoplasmic	DNA replication, restriction, modification, recombination, and repair	NA	NA	NA	NA	DNA repair [GO:0006281]	DNA binding [GO:0003677]	NA
δE	sll0766	3'UTR	DNA repair protein RadC	Cytoplasmic	DNA replication, restriction, modification, recombination, and repair	NA	NA	NA	NA	DNA repair [GO:0006281]	DNA binding [GO:0003677]	NA
δE	sll0848	CDS	chromosomal replication initiator protein DnaA	Cytoplasmic	DNA replication, restriction, modification, recombination, and repair	chromosomal replication	NA	NA	NA	DNA replication initiation [GO:0006270]; regulation of DNA replication [GO:0006275]	ATP binding [GO:0005524]; DNA replication origin binding [GO:0003688]; sequence-specific DNA binding [GO:0043565]	cytoplasm [GO:0005737]
δE	sll0896	CDS	Holliday juction resolvase RuvC	Cytoplasmic	DNA replication, restriction, modification, recombination, and repair	NA	3.1.22.4	CATALYTIC ACTIVITY: Endonucleolytic cleavage at a junction such as a reciprocal single-stranded crossover between two homologous DNA duplexes (Holliday junction).	COFACTOR: Name=Mg(2+); Xref=ChEBI:CHEBI:18420; Evidence={ECO:0000250}; ; Note=Binds 1 Mg(2+) ion per subunit. {ECO:0000250};	recombinational repair [GO:0000725]; replication fork reversal [GO:0071932]	crossover junction endodeoxyribonuclease activity [GO:0008821]; magnesium ion binding [GO:0000287]; nucleic acid binding [GO:0003676]	Holliday junction resolvase complex [GO:0048476]
δE	sll1045	CDS	mutator MutT protein	Unknown	DNA replication, restriction, modification, recombination, and repair	NA	NA	NA	NA	NA	NA	NA
δE	sll1091	3'UTR	thylakoid-associated single-stranded DNA-binding protein, thylakoid SSB	Cytoplasmic	DNA replication, restriction, modification, recombination, and repair	NA	NA	NA	NA	DNA replication [GO:0006260]	single-stranded DNA binding [GO:0003697]	thylakoid membrane [GO:0042651]
δE	sll1119	CDS	putative deoxycytidylate deaminase, DNA repair mechanism	Cytoplasmic	DNA replication, restriction, modification, recombination, and repair	NA	NA	NA	NA	RNA modification [GO:0009451]	catalytic activity [GO:0003824]; zinc ion binding [GO:0008270]	NA
δE	sll1165	5'UTR	DNA mismatch repair protein	Cytoplasmic	DNA replication, restriction, modification, recombination, and repair	NA	NA	NA	NA	mismatch repair [GO:0006298]	ATP binding [GO:0005524]; damaged DNA binding [GO:0003684]; mismatched DNA binding [GO:0030983]	NA
δE	sll1201	3'UTR	putative recombination-promoting nuclease	Cytoplasmic	DNA replication, restriction, modification, recombination, and repair	NA	NA	NA	NA	NA	NA	NA
δE	sll1277	CDS	RecF protein	Cytoplasmic	DNA replication, restriction, modification, recombination, and repair	NA	NA	NA	NA	DNA replication [GO:0006260]; DNA synthesis involved in DNA repair [GO:0000731]; double-strand break repair [GO:0006302]; SOS response [GO:0009432]	ATP binding [GO:0005524]; single-stranded DNA binding [GO:0003697]	cytoplasm [GO:0005737]
δE	sll1277	3'UTR	RecF protein	Cytoplasmic	DNA replication, restriction, modification, recombination, and repair	NA	NA	NA	NA	DNA replication [GO:0006260]; DNA synthesis involved in DNA repair [GO:0000731]; double-strand break repair [GO:0006302]; SOS response [GO:0009432]	ATP binding [GO:0005524]; single-stranded DNA binding [GO:0003697]	cytoplasm [GO:0005737]
δE	sll1360	5'UTR	DNA polymerase III subunit gamma/tau [Contains: Ssp dnaX intein]	Unknown	DNA replication, restriction, modification, recombination, and repair	NA	NA	NA	NA	NA	NA	NA
δE	sll1629	CDS	bacterial cryptochrome	Cytoplasmic	DNA replication, restriction, modification, recombination, and repair	DNA repair	NA	NA	COFACTOR: Name=FAD; Xref=ChEBI:CHEBI:57692; Evidence={ECO:0000269|PubMed:10871367}; ; Note=Binds 1 FAD per subunit. {ECO:0000269|PubMed:10871367};; COFACTOR: Name=oxidized coenzyme F420; Xref=ChEBI:CHEBI:57922; Evidence={ECO:0000250}; ; Note=Binds 1 coenzyme F420 non-covalently per subunit. {ECO:0000250};	DNA repair [GO:0006281]; protein-chromophore linkage [GO:0018298]; regulation of transcription, DNA-templated [GO:0006355]; transcription, DNA-templated [GO:0006351]	DNA binding [GO:0003677]; DNA photolyase activity [GO:0003913]	NA
δE	sll1772	CDS	DNA mismatch repair protein MutS	Cytoplasmic	DNA replication, restriction, modification, recombination, and repair	DNA repair	3.1.-.-	NA	NA	mismatch repair [GO:0006298]; negative regulation of DNA recombination [GO:0045910]	ATPase activity [GO:0016887]; ATP binding [GO:0005524]; endonuclease activity [GO:0004519]; mismatched DNA binding [GO:0030983]	NA
δE	sll1854	CDS	exodeoxyribonuclease III	Cytoplasmic	DNA replication, restriction, modification, recombination, and repair	NA	NA	NA	NA	NA	NA	NA
δE	sll1861	CDS	exodeoxyribonuclease III	Cytoplasmic	DNA replication, restriction, modification, recombination, and repair	NA	NA	NA	NA	NA	NA	NA
δE	sll1941	5'UTR	DNA gyrase A subunit	Cytoplasmic	DNA replication, restriction, modification, recombination, and repair	NA	5.99.1.3	CATALYTIC ACTIVITY: ATP-dependent breakage, passage and rejoining of double-stranded DNA.	NA	chromosome segregation [GO:0007059]; DNA topological change [GO:0006265]	ATP binding [GO:0005524]; DNA binding [GO:0003677]; DNA topoisomerase type II (ATP-hydrolyzing) activity [GO:0003918]	chromosome [GO:0005694]; nucleoid [GO:0009295]; plasma membrane [GO:0005886]
δE	sll5122	CDS	SOS mutagenesis and repair, UmuC protein homolog	Cytoplasmic	DNA replication, restriction, modification, recombination, and repair	NA	NA	NA	NA	DNA repair [GO:0006281]	damaged DNA binding [GO:0003684]	NA
δE	sll5123	CDS	SOS mutagenesis and repair, UmuD protein homolog	Cytoplasmic	DNA replication, restriction, modification, recombination, and repair	NA	NA	NA	NA	DNA repair [GO:0006281]; regulation of transcription, DNA-templated [GO:0006355]; SOS response [GO:0009432]	DNA binding [GO:0003677]; hydrolase activity [GO:0016787]	NA
δE	slr0181	CDS	lplA lipoate---protein ligase	Unknown	DNA replication, restriction, modification, recombination, and repair	NA	NA	NA	NA	DNA recombination [GO:0006310]; DNA repair [GO:0006281]	NA	NA
δE	slr0446	CDS	DNA polymerase III delta&#x27; subunit	CytoplasmicMembrane	DNA replication, restriction, modification, recombination, and repair	NA	NA	NA	NA	NA	NA	NA
δE	slr0790	CDS	similar to ultraviolet light resistance protein B	Unknown	DNA replication, restriction, modification, recombination, and repair	DNA repair	NA	NA	NA	GO:0006281 DNA repair	GO:0003887 DNA-directed DNA polymerase activity GO:0003684 damaged DNA binding	NA
δE	slr0833	CDS	replicative DNA helicase [Contains: Ssp dnaB intein]	Cytoplasmic	DNA replication, restriction, modification, recombination, and repair	NA	3.6.4.12	CATALYTIC ACTIVITY: ATP + H(2)O = ADP + phosphate.	NA	DNA replication, synthesis of RNA primer [GO:0006269]; DNA unwinding involved in DNA replication [GO:0006268]; intein-mediated protein splicing [GO:0016539]	ATP binding [GO:0005524]; DNA binding [GO:0003677]; DNA helicase activity [GO:0003678]; endonuclease activity [GO:0004519]	cytosol [GO:0005829]; primosome complex [GO:1990077]
δE	slr0833	3'UTR	replicative DNA helicase [Contains: Ssp dnaB intein]	Cytoplasmic	DNA replication, restriction, modification, recombination, and repair	NA	3.6.4.12	CATALYTIC ACTIVITY: ATP + H(2)O = ADP + phosphate.	NA	DNA replication, synthesis of RNA primer [GO:0006269]; DNA unwinding involved in DNA replication [GO:0006268]; intein-mediated protein splicing [GO:0016539]	ATP binding [GO:0005524]; DNA binding [GO:0003677]; DNA helicase activity [GO:0003678]; endonuclease activity [GO:0004519]	cytosol [GO:0005829]; primosome complex [GO:1990077]
δE	slr0854	CDS	DNA photolyase	CytoplasmicMembrane	DNA replication, restriction, modification, recombination, and repair	NA	4.1.99.3	CATALYTIC ACTIVITY: Cyclobutadipyrimidine (in DNA) = 2 pyrimidine residues (in DNA).	COFACTOR: Name=FAD; Xref=ChEBI:CHEBI:57692; Evidence={ECO:0000269|PubMed:10896222}; ; Note=Binds 1 FAD per subunit. {ECO:0000269|PubMed:10896222};; COFACTOR: Name=oxidized coenzyme F420; Xref=ChEBI:CHEBI:57922; Evidence={ECO:0000269|PubMed:10896222}; ; Note=Binds 1 coenzyme F420 non-covalently per subunit. {ECO:0000269|PubMed:10896222};	DNA repair [GO:0006281]; protein-chromophore linkage [GO:0018298]	deoxyribodipyrimidine photo-lyase activity [GO:0003904]; DNA binding [GO:0003677]; nucleotide binding [GO:0000166]	NA
δE	slr1597	CDS	chromosome partitioning ATPase, ParA family	Cytoplasmic	DNA replication, restriction, modification, recombination, and repair	NA	NA	NA	NA	NA	NA	NA
δE	slr1597	3'UTR	chromosome partitioning ATPase, ParA family	Cytoplasmic	DNA replication, restriction, modification, recombination, and repair	NA	NA	NA	NA	NA	NA	NA
δE	slr1597	5'UTR	chromosome partitioning ATPase, ParA family	Cytoplasmic	DNA replication, restriction, modification, recombination, and repair	NA	NA	NA	NA	NA	NA	NA
δE	slr1803	3'UTR	adenine-specific DNA methylase	Cytoplasmic	DNA replication, restriction, modification, recombination, and repair	NA	NA	NA	NA	NA	NA	NA
δJ	slr6097	CDS	type I site-specific deoxyribonuclease	Cytoplasmic	DNA replication, restriction, modification, recombination, and repair	NA	NA	NA	NA	DNA modification [GO:0006304]	DNA binding [GO:0003677]	NA
δJ	slr6097	5'UTR	type I site-specific deoxyribonuclease	Cytoplasmic	DNA replication, restriction, modification, recombination, and repair	NA	NA	NA	NA	DNA modification [GO:0006304]	DNA binding [GO:0003677]	NA
δE	sll0107	CDS	KHG/KDPG aldolase	Cytoplasmic	Energy metabolism	glycolysis	NA	NA	NA	GO:0008152 metabolic process	GO:0003824 catalytic activity	NA
δE	sll0244	5'UTR	UDP-glucose 4-epimerase	Cytoplasmic	Energy metabolism	Sugars	NA	NA	NA	NA	NA	NA
δJ	sll0529	5'UTR	putative phospho-ketolase, transketolase	Extracellular	Energy metabolism	Pentose phosphate pathway	NA	NA	NA	carbohydrate metabolic process [GO:0005975]	aldehyde-lyase activity [GO:0016832]	NA
δE	sll0823	3'UTR	probable succinate dehydrogenase iron-sulfur protein	CytoplasmicMembrane	Energy metabolism	TCA cycle	NA	NA	NA	NA	NA	NA
δE	sll0938	CDS	aspartate transaminase	CytoplasmicMembrane	Energy metabolism	Amino acids and amines	NA	NA	NA	biosynthetic process [GO:0009058]	catalytic activity [GO:0003824]; pyridoxal phosphate binding [GO:0030170]	NA
δE	sll1189	CDS	glycolate oxidase subunit GlcE	Cytoplasmic	Energy metabolism	Glycolate pathway	NA	NA	NA	NA	NA	NA
δE	sll1189	3'UTR	glycolate oxidase subunit GlcE	Cytoplasmic	Energy metabolism	Glycolate pathway	NA	NA	NA	NA	NA	NA
δE	sll1189	5'UTR	glycolate oxidase subunit GlcE	Cytoplasmic	Energy metabolism	Glycolate pathway	NA	NA	NA	NA	NA	NA
δE	sll1196	CDS	phosphofructokinase	Cytoplasmic	Energy metabolism	Glycolysis	2.7.1.11	CATALYTIC ACTIVITY: ATP + D-fructose 6-phosphate = ADP + D-fructose 1,6-bisphosphate. {ECO:0000255|HAMAP-Rule:MF_01976}.	COFACTOR: Name=Mg(2+); Xref=ChEBI:CHEBI:18420; Evidence={ECO:0000255|HAMAP-Rule:MF_01976};	fructose 6-phosphate metabolic process [GO:0006002]	6-phosphofructokinase activity [GO:0003872]; ATP binding [GO:0005524]; diphosphate-fructose-6-phosphate 1-phosphotransferase activity [GO:0047334]; metal ion binding [GO:0046872]	cytoplasm [GO:0005737]
δE	sll1214	3'UTR	putative oxalate decarboxylase, periplasmic protein	Cytoplasmic	Energy metabolism	Amino acids and amines	NA	NA	NA	oxalate metabolic process [GO:0033609]	metal ion binding [GO:0046872]; nutrient reservoir activity [GO:0045735]; oxalate decarboxylase activity [GO:0046564]	outer membrane-bounded periplasmic space [GO:0030288]
δE	sll1231	CDS	mannosyltransferase	Cytoplasmic	Energy metabolism	Sugars	NA	NA	NA	NA	NA	NA
δE	sll1349	CDS	phosphoglycolate phosphatase	Cytoplasmic	Energy metabolism	Glycolate pathway	3.1.3.18	NA	NA	NA	NA	NA
δE	sll1349	5'UTR	phosphoglycolate phosphatase	Cytoplasmic	Energy metabolism	Glycolate pathway	3.1.3.18	NA	NA	NA	NA	NA
δE	sll1358	CDS	putative oxalate decarboxylase, periplasmic protein	Cytoplasmic	Energy metabolism	Amino acids and amines	NA	NA	NA	oxalate metabolic process [GO:0033609]	metal ion binding [GO:0046872]; nutrient reservoir activity [GO:0045735]; oxalate decarboxylase activity [GO:0046564]	outer membrane-bounded periplasmic space [GO:0030288]
δE	sll1557	CDS	succinyl-CoA synthetase alpha chain	Cytoplasmic	Energy metabolism	TCA cycle	NA	NA	NA	NA	NA	NA
δE	sll1557	5'UTR	succinyl-CoA synthetase alpha chain	Cytoplasmic	Energy metabolism	TCA cycle	NA	NA	NA	NA	NA	NA
δE	sll1682	5'UTR	alanine dehydrogenase	Cytoplasmic	Energy metabolism	Amino acids and amines	1.4.1.1	CATALYTIC ACTIVITY: L-alanine + H(2)O + NAD(+) = pyruvate + NH(3) + NADH. {ECO:0000256|PIRNR:PIRNR000183}.	NA	alanine catabolic process [GO:0006524]; L-alanine catabolic process [GO:0042853]	alanine dehydrogenase activity [GO:0000286]	plasma membrane [GO:0005886]
δE	sll1709	CDS	3-ketoacyl-acyl carrier protein reductase	Cytoplasmic	Energy metabolism	Pentose phosphate pathway	NA	NA	NA	NA	NA	NA
δJ	sll1831	CDS	glycolate oxidase subunit, (Fe-S)protein	CytoplasmicMembrane	Energy metabolism	Glycolate pathway	NA	NA	NA	NA	NA	NA
δE	slr0194	5'UTR	ribose 5-phosphate isomerase	Cytoplasmic	Energy metabolism	Sugars	5.3.1.6	CATALYTIC ACTIVITY: D-ribose 5-phosphate = D-ribulose 5-phosphate. {ECO:0000255|HAMAP-Rule:MF_00170}.	NA	pentose-phosphate shunt, non-oxidative branch [GO:0009052]	ribose-5-phosphate isomerase activity [GO:0004751]	NA
δE	slr0229	5'UTR	3-hydroxyisobutyrate dehydrogenase	Cytoplasmic	Energy metabolism	Amino acids and amines	1.1.-.-	NA	NA	NA	NAD binding [GO:0051287]; phosphogluconate dehydrogenase (decarboxylating) activity [GO:0004616]	NA
δE/δJ	slr0301	CDS	phosphoenolpyruvate synthase	Cytoplasmic	Energy metabolism	Pyruvate and acetyl-CoA metabolism	2.7.9.2	CATALYTIC ACTIVITY: ATP + pyruvate + H(2)O = AMP + phosphoenolpyruvate + phosphate.	COFACTOR: Name=Mg(2+); Xref=ChEBI:CHEBI:18420; Evidence={ECO:0000250};	gluconeogenesis [GO:0006094]; pyruvate metabolic process [GO:0006090]	ATP binding [GO:0005524]; metal ion binding [GO:0046872]; pyruvate, water dikinase activity [GO:0008986]	NA
δE	slr0329	CDS	glucokinase	Cytoplasmic	Energy metabolism	Glycolysis	NA	NA	NA	NA	NA	NA
δE	slr0458	CDS	bciB 3-8-divinyl protochlorophyllide a 8-vinyl-reductase (ferredoxin)	Cytoplasmic	Energy metabolism	Glycolate pathway	NA	NA	NA	NA	hydrolase activity [GO:0016787]	NA
δE	slr0657	5'UTR	aspartate kinase	Cytoplasmic	Energy metabolism	Amino acids and amines	NA	NA	NA	NA	NA	NA
δE	slr0721	CDS	malic enzyme	Cytoplasmic	Energy metabolism	Pyruvate and acetyl-CoA metabolism	NA	NA	NA	NA	NA	NA
δE	slr0879	CDS	glycine decarboxylase complex H-protein	Cytoplasmic	Energy metabolism	Amino acids and amines	NA	NA	COFACTOR: Name=(R)-lipoate; Xref=ChEBI:CHEBI:83088; Evidence={ECO:0000255|HAMAP-Rule:MF_00272}; ; Note=Binds 1 lipoyl cofactor covalently. {ECO:0000255|HAMAP-Rule:MF_00272};	glycine decarboxylation via glycine cleavage system [GO:0019464]	NA	glycine cleavage complex [GO:0005960]
δJ	slr0884	5'UTR	glyceraldehyde 3-phosphate dehydrogenase 1 (NAD+)	Cytoplasmic	Energy metabolism	Glycolysis	1.2.1.12	CATALYTIC ACTIVITY: D-glyceraldehyde 3-phosphate + phosphate + NAD(+) = 3-phospho-D-glyceroyl phosphate + NADH. {ECO:0000250|UniProtKB:P09124}.	NA	glucose metabolic process [GO:0006006]; glycolytic process [GO:0006096]	glyceraldehyde-3-phosphate dehydrogenase (NAD+) (phosphorylating) activity [GO:0004365]; NAD binding [GO:0051287]; NADP binding [GO:0050661]	NA
δE/δJ	slr0884	CDS	glyceraldehyde 3-phosphate dehydrogenase 1 (NAD+)	Cytoplasmic	Energy metabolism	Glycolysis	1.2.1.12	CATALYTIC ACTIVITY: D-glyceraldehyde 3-phosphate + phosphate + NAD(+) = 3-phospho-D-glyceroyl phosphate + NADH. {ECO:0000250|UniProtKB:P09124}.	NA	glucose metabolic process [GO:0006006]; glycolytic process [GO:0006096]	glyceraldehyde-3-phosphate dehydrogenase (NAD+) (phosphorylating) activity [GO:0004365]; NAD binding [GO:0051287]; NADP binding [GO:0050661]	NA
δE	slr1124	5'UTR	phosphoglycerate mutase	Cytoplasmic	Energy metabolism	Glycolysis	NA	NA	NA	NA	NA	NA
δE	slr1349	5'UTR	glucose-6-phosphate isomerase	Cytoplasmic	Energy metabolism	Glycolysis	5.3.1.9	CATALYTIC ACTIVITY: D-glucose 6-phosphate = D-fructose 6-phosphate.	NA	gluconeogenesis [GO:0006094]; glycolytic process [GO:0006096]	glucose-6-phosphate isomerase activity [GO:0004347]	cytoplasm [GO:0005737]
δE	slr1608	5'UTR	putative glucose dehydrogenase-B, periplasmic protein	Unknown	Energy metabolism	Sugars	NA	NA	COFACTOR: Name=pyrroloquinoline quinone; Xref=ChEBI:CHEBI:58442; Evidence={ECO:0000305};	carbohydrate metabolic process [GO:0005975]	oxidoreductase activity, acting on the CH-OH group of donors, quinone or similar compound as acceptor [GO:0016901]; quinone binding [GO:0048038]	outer membrane-bounded periplasmic space [GO:0030288]
δE	slr1718	5'UTR	putative 2-phosphosulfolactate phosphatase	Unknown	Energy metabolism	Sugars	3.1.3.71	CATALYTIC ACTIVITY: (2R)-2-phospho-3-sulfolactate + H(2)O = (2R)-3-sulfolactate + phosphate.	COFACTOR: Name=Mg(2+); Xref=ChEBI:CHEBI:18420; Evidence={ECO:0000250};	coenzyme M biosynthetic process [GO:0019295]	2-phosphosulfolactate phosphatase activity [GO:0050532]; magnesium ion binding [GO:0000287]	NA
δE	slr1840	CDS	putative glycerate kinase	Cytoplasmic	Energy metabolism	Glycolysis	2.7.1.165	NA	NA	organic acid phosphorylation [GO:0031388]	glycerate kinase activity [GO:0008887]	NA
δE	slr1877	CDS	2-hydroxyhepta-2,4-diene-1,7-dioate isomerase	Cytoplasmic	Energy metabolism	Amino acids and amines	NA	NA	NA	NA	NA	NA
δE	slr1877	5'UTR	2-hydroxyhepta-2,4-diene-1,7-dioate isomerase	Cytoplasmic	Energy metabolism	Amino acids and amines	NA	NA	NA	NA	NA	NA
δE	slr2121	CDS	TSPO translocator protein	Cytoplasmic	Energy metabolism	Glycolate pathway	NA	NA	NA	tryptophan catabolic process to kynurenine [GO:0019441]	arylformamidase activity [GO:0004061]	NA
δE	sll0053	5'UTR	biotin carboxylase	Cytoplasmic	Fatty acid, phospholipid and sterol metabolism	NA	NA	NA	NA	NA	NA	NA
δE	sll0209	3'UTR	Long-chain acyl-[acyl-carrier-protein] reductase	Cytoplasmic	Fatty acid, phospholipid and sterol metabolism	NA	1.2.1.80	CATALYTIC ACTIVITY: A long-chain aldehyde + an [acyl-carrier protein] + NAD(P)(+) = a long-chain acyl-[acyl-carrier protein] + NAD(P)H.	COFACTOR: Name=a divalent metal cation; Xref=ChEBI:CHEBI:60240; Evidence={ECO:0000250};	copper ion import [GO:0015677]	cupric reductase activity [GO:0008823]; ferric-chelate reductase (NADPH) activity [GO:0052851]	NA
δE	sll0330	3'UTR	sepiapterine reductase	Cytoplasmic	Fatty acid, phospholipid and sterol metabolism	NA	NA	NA	NA	NA	NA	NA
δE	sll0330	5'UTR	sepiapterine reductase /fabG	Cytoplasmic	Fatty acid, phospholipid and sterol metabolism	tetrahydrobiopterin synthesis	NA	NA	NA	GO:0008152 metabolic process GO:0055114 oxidation reduction	GO:0005488 binding GO:0003824 catalytic activity GO:0016491 oxidoreductase activity	NA
δE	sll0330	CDS	sepiapterine reductase /fabG	Cytoplasmic	Fatty acid, phospholipid and sterol metabolism	tetrahydrobiopterin synthesis	NA	NA	NA	GO:0008152 metabolic process GO:0055114 oxidation reduction	GO:0005488 binding GO:0003824 catalytic activity GO:0016491 oxidoreductase activity	NA
δE	sll0728	5'UTR	acetyl-CoA carboxylase alpha subunit	Cytoplasmic	Fatty acid, phospholipid and sterol metabolism	NA	6.4.1.2	CATALYTIC ACTIVITY: ATP + acetyl-CoA + HCO(3)(-) = ADP + phosphate + malonyl-CoA. {ECO:0000255|HAMAP-Rule:MF_00823}.	NA	fatty acid biosynthetic process [GO:0006633]; malonyl-CoA biosynthetic process [GO:2001295]	acetyl-CoA carboxylase activity [GO:0003989]; ATP binding [GO:0005524]	acetyl-CoA carboxylase complex [GO:0009317]
δE	sll0728	CDS	acetyl-CoA carboxylase alpha subunit	Cytoplasmic	Fatty acid, phospholipid and sterol metabolism	NA	6.4.1.2	CATALYTIC ACTIVITY: ATP + acetyl-CoA + HCO(3)(-) = ADP + phosphate + malonyl-CoA. {ECO:0000255|HAMAP-Rule:MF_00823}.	NA	fatty acid biosynthetic process [GO:0006633]; malonyl-CoA biosynthetic process [GO:2001295]	acetyl-CoA carboxylase activity [GO:0003989]; ATP binding [GO:0005524]	acetyl-CoA carboxylase complex [GO:0009317]
δE	sll1085	CDS	glycerol-3-phosphate dehydrogenase	Cytoplasmic	Fatty acid, phospholipid and sterol metabolism	NA	1.1.5.3	CATALYTIC ACTIVITY: sn-glycerol 3-phosphate + a quinone = glycerone phosphate + a quinol.	COFACTOR: Name=FAD; Xref=ChEBI:CHEBI:57692; Evidence={ECO:0000250};	glycerol-3-phosphate metabolic process [GO:0006072]; glycerol metabolic process [GO:0006071]	sn-glycerol-3-phosphate:ubiquinone-8 oxidoreductase activity [GO:0052591]	glycerol-3-phosphate dehydrogenase complex [GO:0009331]
δE	sll1085	3'UTR	glycerol-3-phosphate dehydrogenase	Cytoplasmic	Fatty acid, phospholipid and sterol metabolism	NA	1.1.5.3	CATALYTIC ACTIVITY: sn-glycerol 3-phosphate + a quinone = glycerone phosphate + a quinol.	COFACTOR: Name=FAD; Xref=ChEBI:CHEBI:57692; Evidence={ECO:0000250};	glycerol-3-phosphate metabolic process [GO:0006072]; glycerol metabolic process [GO:0006071]	sn-glycerol-3-phosphate:ubiquinone-8 oxidoreductase activity [GO:0052591]	glycerol-3-phosphate dehydrogenase complex [GO:0009331]
δE	sll1306	CDS	acyl-lipid desaturase (delta 12)	CytoplasmicMembrane	Fatty acid, phospholipid and sterol metabolism	NA	1.14.19.6	CATALYTIC ACTIVITY: Oleoyl-CoA + 2 ferrocytochrome b5 + O(2) + 2 H(+) = linoleoyl-CoA + 2 ferricytochrome b5 + 2 H(2)O. {ECO:0000269|PubMed:2118597}.; CATALYTIC ACTIVITY: Palmitoleoyl-CoA + 2 ferrocytochrome b5 + O(2) + 2 H(+) = (9Z,12Z)-hexadeca-9,12-dienoyl-CoA + 2 ferricytochrome b5 + 2 H(2)O. {ECO:0000269|PubMed:2118597}.	NA	unsaturated fatty acid biosynthetic process [GO:0006636]	oxidoreductase activity [GO:0016491]	integral component of membrane [GO:0016021]; plasma membrane [GO:0005886]
δE	sll1441	5'UTR	acyl-lipid desaturase (omega-3)	CytoplasmicMembrane	Fatty acid, phospholipid and sterol metabolism	NA	NA	NA	NA	NA	NA	NA
δE	sll1605	5'UTR	(3R)-hydroxymyristol acyl carrier protein dehydrase	Cytoplasmic	Fatty acid, phospholipid and sterol metabolism	NA	4.2.1.59	CATALYTIC ACTIVITY: A (3R)-3-hydroxyacyl-[acyl-carrier protein] = a trans-2-enoyl-[acyl-carrier protein] + H(2)O. {ECO:0000255|HAMAP-Rule:MF_00406}.	NA	fatty acid biosynthetic process [GO:0006633]; lipid A biosynthetic process [GO:0009245]	3-hydroxyoctanoyl-[acyl-carrier-protein] dehydratase activity [GO:0047451]	cytoplasm [GO:0005737]
δE	sll1775	5'UTR	lpxB lipid-A-disaccharide synthase	Unknown	Fatty acid, phospholipid and sterol metabolism	NA	NA	NA	NA	glucosylceramide catabolic process [GO:0006680]	glucosylceramidase activity [GO:0004348]	integral component of membrane [GO:0016021]
δE	sll1969	CDS	ppnK NAD+ kinase	Unknown	Fatty acid, phospholipid and sterol metabolism	NA	NA	NA	NA	NA	hydrolase activity [GO:0016787]	NA
δE	sll1969	3'UTR	ppnK NAD+ kinase	Unknown	Fatty acid, phospholipid and sterol metabolism	NA	NA	NA	NA	NA	hydrolase activity [GO:0016787]	NA
δE	sll1973	3'UTR	ppnK NAD+ kinase	CytoplasmicMembrane	Fatty acid, phospholipid and sterol metabolism	NA	2.3.1.n3	CATALYTIC ACTIVITY: Acyl-phosphate + sn-glycerol 3-phosphate = 1-acyl-sn-glycerol 3-phosphate + phosphate. {ECO:0000255|HAMAP-Rule:MF_01043}.	NA	phospholipid biosynthetic process [GO:0008654]	acyl-phosphate glycerol-3-phosphate acyltransferase activity [GO:0043772]	integral component of membrane [GO:0016021]; plasma membrane [GO:0005886]
δE	sll1973	5'UTR	ppnK NAD+ kinase	CytoplasmicMembrane	Fatty acid, phospholipid and sterol metabolism	NA	2.3.1.n3	CATALYTIC ACTIVITY: Acyl-phosphate + sn-glycerol 3-phosphate = 1-acyl-sn-glycerol 3-phosphate + phosphate. {ECO:0000255|HAMAP-Rule:MF_01043}.	NA	phospholipid biosynthetic process [GO:0008654]	acyl-phosphate glycerol-3-phosphate acyltransferase activity [GO:0043772]	integral component of membrane [GO:0016021]; plasma membrane [GO:0005886]
δE	slr0776	3'UTR	UDP-3-o-[3-hydroxymyristoyl] glucosamine n-acyltransferase	Cytoplasmic	Fatty acid, phospholipid and sterol metabolism	NA	2.3.1.-	CATALYTIC ACTIVITY: (3R)-3-hydroxyacyl-[acyl-carrier-protein] + UDP-3-O-acyl-alpha-D-glucosamine = UDP-2,3-diacyl-alpha-D-glucosamine + [acyl-carrier-protein]. {ECO:0000255|HAMAP-Rule:MF_00523}.	NA	lipid A biosynthetic process [GO:0009245]	N-acyltransferase activity [GO:0016410]	NA
δE	slr1051	5'UTR	enoyl-[acyl-carrier-protein] reductase	CytoplasmicMembrane	Fatty acid, phospholipid and sterol metabolism	NA	1.3.1.9	CATALYTIC ACTIVITY: An acyl-[acyl-carrier protein] + NAD(+) = a trans-2,3-dehydroacyl-[acyl-carrier protein] + NADH.	NA	fatty acid elongation [GO:0030497]; protein homotetramerization [GO:0051289]	enoyl-[acyl-carrier-protein] reductase (NADH) activity [GO:0004318]	NA
δE	slr1332	CDS	beta ketoacyl-acyl carrier protein synthase	CytoplasmicMembrane	Fatty acid, phospholipid and sterol metabolism	NA	NA	NA	NA	GO:0009058 biosynthetic process GO:0008152 metabolic process	GO:0003824 catalytic activity	NA
δJ	slr1350	3'UTR	acyl-lipid desaturase (delta 12)	CytoplasmicMembrane	Fatty acid, phospholipid and sterol metabolism	NA	1.14.19.6	CATALYTIC ACTIVITY: Oleoyl-CoA + 2 ferrocytochrome b5 + O(2) + 2 H(+) = linoleoyl-CoA + 2 ferricytochrome b5 + 2 H(2)O. {ECO:0000269|PubMed:2118597}.; CATALYTIC ACTIVITY: Palmitoleoyl-CoA + 2 ferrocytochrome b5 + O(2) + 2 H(+) = (9Z,12Z)-hexadeca-9,12-dienoyl-CoA + 2 ferricytochrome b5 + 2 H(2)O. {ECO:0000269|PubMed:2118597}.	NA	unsaturated fatty acid biosynthetic process [GO:0006636]	oxidoreductase activity [GO:0016491]	integral component of membrane [GO:0016021]; plasma membrane [GO:0005886]
δE	slr2023	5'UTR	malonyl coenzyme A-acyl carrier protein transacylase	Cytoplasmic	Fatty acid, phospholipid and sterol metabolism	NA	2.3.1.39	CATALYTIC ACTIVITY: Malonyl-CoA + an [acyl-carrier-protein] = CoA + a malonyl-[acyl-carrier-protein].	NA	fatty acid biosynthetic process [GO:0006633]	[acyl-carrier-protein] S-malonyltransferase activity [GO:0004314]	NA
δE	slr2089	CDS	squalene-hopene-cyclase	CytoplasmicMembrane	Fatty acid, phospholipid and sterol metabolism	hopene synthesis	5.4.99.17 4.2.1.129	NA	NA	GO:0019746 hopanoid biosynthetic process	GO:0003824 catalytic activity GO:0016866 intramolecular transferase activity	NA
δE	slr2089	3'UTR	squalene-hopene-cyclase	CytoplasmicMembrane	Fatty acid, phospholipid and sterol metabolism	NA	NA	NA	NA	NA	NA	NA
δE	slr2124	CDS	3-oxoacyl-[acyl-carrier protein] reductase	Cytoplasmic	Fatty acid, phospholipid and sterol metabolism	NA	NA	NA	NA	NA	oxidoreductase activity [GO:0016491]	NA
δE	sll0036	5'UTR	hypothetical protein	Cytoplasmic	Hypothetical	NA	NA	NA	NA	methylglyoxal biosynthetic process [GO:0019242]	methylglyoxal synthase activity [GO:0008929]; NAD+ kinase activity [GO:0003951]	NA
δE	sll0060	CDS	hypothetical protein	CytoplasmicMembrane	Hypothetical	NA	NA	NA	NA	NA	NA	integral component of membrane [GO:0016021]; plasma membrane [GO:0005886]
δJ	sll0060	CDS	hypothetical protein	CytoplasmicMembrane	Hypothetical	NA	NA	NA	NA	NA	NA	integral component of membrane [GO:0016021]; plasma membrane [GO:0005886]
δE	sll0082	5'UTR	hypothetical protein	CytoplasmicMembrane	Hypothetical	NA	NA	NA	NA	NA	NA	integral component of membrane [GO:0016021]
δE	sll0082	CDS	hypothetical protein	CytoplasmicMembrane	Hypothetical	NA	NA	NA	NA	NA	NA	integral component of membrane [GO:0016021]
δE	sll0095	CDS	hypothetical protein	CytoplasmicMembrane	Hypothetical	NA	NA	NA	NA	NA	NA	NA
δE	sll0096	5'UTR	hypothetical protein	Cytoplasmic	Hypothetical	NA	NA	NA	NA	NA	NA	NA
δE	sll0096	CDS	hypothetical protein	Cytoplasmic	Hypothetical	NA	NA	NA	NA	NA	NA	NA
δJ	sll0141	3'UTR	hypothetical protein	CytoplasmicMembrane	Hypothetical	NA	NA	NA	NA	transmembrane transport [GO:0055085]	NA	membrane [GO:0016020]
δE	sll0157	5'UTR	hypothetical protein	Unknown	Hypothetical	NA	NA	NA	NA	NA	NA	NA
δE	sll0157	CDS	hypothetical protein	Unknown	Hypothetical	NA	NA	NA	NA	NA	NA	NA
δE	sll0177	CDS	hypothetical protein	Cytoplasmic	Hypothetical	NA	NA	NA	NA	NA	DNA binding [GO:0003677]; recombinase activity [GO:0000150]	NA
δE	sll0192	3'UTR	hypothetical protein	CytoplasmicMembrane	Hypothetical	NA	NA	NA	NA	NA	NA	NA
δE	sll0192	CDS	hypothetical protein	CytoplasmicMembrane	Hypothetical	NA	NA	NA	NA	NA	NA	NA
δE	sll0249	3'UTR	hypothetical protein	CytoplasmicMembrane	Hypothetical	NA	NA	NA	NA	NA	NA	NA
δE	sll0249	CDS	hypothetical protein	CytoplasmicMembrane	Hypothetical	NA	NA	NA	NA	NA	NA	NA
δE	sll0260	3'UTR	hypothetical protein	CytoplasmicMembrane	Hypothetical	NA	NA	NA	NA	NA	flavin adenine dinucleotide binding [GO:0050660]; oxidoreductase activity, acting on CH-OH group of donors [GO:0016614]	integral component of membrane [GO:0016021]; plasma membrane [GO:0005886]
δE	sll0286	3'UTR	uncharacterized N-acetyltransferase/hypothetical protein YCF52	Cytoplasmic	Hypothetical	NA	2.3.1.-	NA	NA	GO:0008152 metabolic process	GO:0008080 N-acetyltransferase activity	NA
δE	sll0286	5'UTR	uncharacterized N-acetyltransferase/hypothetical protein YCF52	Cytoplasmic	Hypothetical	NA	2.3.1.-	NA	NA	GO:0008152 metabolic process	GO:0008080 N-acetyltransferase activity	NA
δE	sll0286	CDS	uncharacterized N-acetyltransferase/hypothetical protein YCF52	Cytoplasmic	Hypothetical	NA	2.3.1.-	NA	NA	GO:0008152 metabolic process	GO:0008080 N-acetyltransferase activity	NA
δE	sll0295	5'UTR	hypothetical protein	Cytoplasmic	Hypothetical	NA	NA	NA	NA	regulation of vesicle-mediated transport [GO:0060627]; SNARE complex assembly [GO:0035493]	SNARE binding [GO:0000149]	NA
δE	sll0297	CDS	hypothetical protein	Unknown	Hypothetical	NA	NA	NA	NA	NA	NA	NA
δE	sll0310	CDS	hypothetical protein	Cytoplasmic	Hypothetical	NA	NA	NA	NA	GO:0008152 metabolic process	GO:0008080 N-acetyltransferase activity	NA
δE	sll0325	3'UTR	hypothetical protein	Unknown	Hypothetical	NA	NA	NA	NA	NA	NA	integral component of membrane [GO:0016021]
δE	sll0325	CDS	hypothetical protein	Unknown	Hypothetical	NA	NA	NA	NA	NA	NA	integral component of membrane [GO:0016021]
δE	sll0361	CDS	hypothetical protein	Unknown	Hypothetical	NA	NA	NA	NA	NA	NA	NA
δE/δJ	sll0381	5'UTR	hypothetical protein	Unknown	Hypothetical	NA	NA	NA	NA	NA	NA	NA
δE/δJ	sll0381	CDS	hypothetical protein	Unknown	Hypothetical	NA	NA	NA	NA	NA	NA	NA
δE/δJ	sll0382	CDS	hypothetical protein	Unknown	Hypothetical	NA	NA	NA	NA	NA	NA	NA
δE	sll0412	CDS	hypothetical protein	CytoplasmicMembrane	Hypothetical	NA	NA	NA	NA	NA	NA	integral component of membrane [GO:0016021]; thylakoid membrane [GO:0042651]
δE	sll0414	5'UTR	hypothetical protein	Extracellular	Hypothetical	NA	NA	NA	NA	NA	NA	NA
δE	sll0424	CDS	hypothetical protein	Unknown	Hypothetical	NA	NA	NA	NA	tRNA methylthiolation [GO:0035600]	4 iron, 4 sulfur cluster binding [GO:0051539]; methylthiotransferase activity [GO:0035596]	NA
δE	sll0499	CDS	hypothetical protein	OuterMembrane	Hypothetical	NA	NA	NA	NA	NA	NA	NA
δE	sll0525	3'UTR	hypothetical protein	Unknown	Hypothetical	NA	NA	NA	NA	NA	NA	NA
δE/δJ	sll0543	3'UTR	hypothetical protein	CytoplasmicMembrane	Hypothetical	NA	NA	NA	NA	NA	NA	integral component of membrane [GO:0016021]
δE/δJ	sll0543	CDS	hypothetical protein	CytoplasmicMembrane	Hypothetical	NA	NA	NA	NA	NA	NA	integral component of membrane [GO:0016021]
δE	sll0549	3'UTR	hypothetical protein	Cytoplasmic	Hypothetical	NA	NA	NA	NA	DNA replication [GO:0006260]	DNA binding [GO:0003677]; DNA-directed DNA polymerase activity [GO:0003887]; hydrolase activity [GO:0016787]	NA
δE	sll0549	5'UTR	hypothetical protein	Cytoplasmic	Hypothetical	NA	NA	NA	NA	DNA replication [GO:0006260]	DNA binding [GO:0003677]; DNA-directed DNA polymerase activity [GO:0003887]; hydrolase activity [GO:0016787]	NA
δE	sll0549	CDS	hypothetical protein	Cytoplasmic	Hypothetical	NA	NA	NA	NA	DNA replication [GO:0006260]	DNA binding [GO:0003677]; DNA-directed DNA polymerase activity [GO:0003887]; hydrolase activity [GO:0016787]	NA
δE	sll0558	3'UTR	hypothetical protein YCF53	Unknown	Hypothetical	NA	NA	NA	NA	NA	NA	NA
δE	sll0586	CDS	hypothetical protein	Cytoplasmic	Hypothetical	NA	NA	NA	NA	NA	oxidoreductase activity [GO:0016491]	NA
δE	sll0608	5'UTR	hypothetical protein YCF49	CytoplasmicMembrane	Hypothetical	NA	NA	NA	NA	NA	NA	NA
δE	sll0676	5'UTR	hypothetical protein	Unknown	Hypothetical	NA	NA	NA	NA	NA	NA	NA
δE	sll0788	5'UTR	hypothetical protein	Unknown	Hypothetical	NA	NA	NA	NA	NA	NA	integral component of membrane [GO:0016021]
δE	sll0788	CDS	hypothetical protein	Unknown	Hypothetical	NA	NA	NA	NA	NA	NA	integral component of membrane [GO:0016021]
δE	sll0793	CDS	hypothetical protein	CytoplasmicMembrane	Hypothetical	NA	NA	NA	NA	NA	NA	integral component of membrane [GO:0016021]; plasma membrane [GO:0005886]
δE	sll0804	3'UTR	hypothetical protein	CytoplasmicMembrane	Hypothetical	NA	NA	NA	NA	NA	GTP binding [GO:0005525]	integral component of membrane [GO:0016021]
δE	sll0809	CDS	hypothetical protein	Unknown	Hypothetical	NA	NA	NA	NA	NA	NA	NA
δE	sll0812	5'UTR	hypothetical protein	Unknown	Hypothetical	NA	NA	NA	NA	NA	NA	NA
δE	sll0827	5'UTR	hypothetical protein	CytoplasmicMembrane	Hypothetical	NA	NA	NA	NA	NA	NA	integral component of membrane [GO:0016021]
δE	sll0839	3'UTR	hypothetical protein	CytoplasmicMembrane	Hypothetical	NA	NA	NA	NA	NA	NA	integral component of membrane [GO:0016021]
δE	sll0839	CDS	hypothetical protein	CytoplasmicMembrane	Hypothetical	NA	NA	NA	NA	NA	NA	integral component of membrane [GO:0016021]
δE	sll0854	CDS	hypothetical protein	Unknown	Hypothetical	NA	NA	NA	NA	NA	NA	NA
δE	sll0864	CDS	hypothetical protein	Unknown	Hypothetical	NA	NA	NA	NA	NA	NA	NA
δE	sll0871	3'UTR	hypothetical protein	Unknown	Hypothetical	NA	NA	NA	NA	NA	NA	NA
δE	sll0888	5'UTR	hypothetical protein	Cytoplasmic	Hypothetical	NA	NA	NA	NA	NA	NA	NA
δE	sll0925	5'UTR	hypothetical protein	Cytoplasmic	Hypothetical	NA	NA	NA	NA	NA	NA	NA
δE	sll0939	CDS	hypothetical protein	CytoplasmicMembrane	Hypothetical	NA	NA	NA	NA	NA	NA	NA
δE	sll0944	CDS	hypothetical protein	Unknown	Hypothetical	NA	NA	NA	NA	NA	NA	NA
δE	sll0983	CDS	hypothetical protein	Unknown	Hypothetical	NA	NA	NA	NA	NA	oxidoreductase activity, acting on the CH-NH group of donors [GO:0016645]	NA
δE	sll0984	5'UTR	hypothetical protein	Cytoplasmic	Hypothetical	NA	NA	NA	NA	NA	NA	NA
δE	sll0984	CDS	hypothetical protein	Cytoplasmic	Hypothetical	NA	NA	NA	NA	NA	NA	NA
δE	sll0994	CDS	hypothetical protein	CytoplasmicMembrane	Hypothetical	NA	NA	NA	NA	NA	NA	integral component of membrane [GO:0016021]
δE	sll1002	5'UTR	hypothetical protein YCF22	Unknown	Hypothetical	NA	NA	NA	NA	NA	NA	NA
δE	sll1011	3'UTR	hypothetical protein	Extracellular	Hypothetical	NA	NA	NA	NA	NA	NA	NA
δE	sll1011	5'UTR	hypothetical protein	Extracellular	Hypothetical	NA	NA	NA	NA	NA	NA	NA
δE	sll1011	CDS	hypothetical protein	Extracellular	Hypothetical	NA	NA	NA	NA	NA	NA	NA
δE	sll1024	CDS	hypothetical protein	CytoplasmicMembrane	Hypothetical	NA	NA	NA	NA	NA	NA	integral component of membrane [GO:0016021]; plasma membrane [GO:0005886]
δE	sll1025	3'UTR	hypothetical protein	Unknown	Hypothetical	NA	NA	NA	NA	NA	oxidoreductase activity [GO:0016491]	NA
δE	sll1049	5'UTR	hypothetical protein	Cytoplasmic	Hypothetical	NA	NA	NA	NA	NA	NA	NA
δE	sll1052	CDS	hypothetical protein	CytoplasmicMembrane	Hypothetical	NA	NA	NA	NA	NA	NA	integral component of membrane [GO:0016021]; plasma membrane [GO:0005886]
δE	sll1053	5'UTR	hypothetical protein	Unknown	Hypothetical	NA	NA	NA	NA	protein secretion [GO:0009306]; transmembrane transport [GO:0055085]	NA	cell [GO:0005623]; integral component of membrane [GO:0016021]
δE	sll1053	CDS	hypothetical protein	Unknown	Hypothetical	NA	NA	NA	NA	protein secretion [GO:0009306]; transmembrane transport [GO:0055085]	NA	cell [GO:0005623]; integral component of membrane [GO:0016021]
δE	sll1060	CDS	hypothetical protein	CytoplasmicMembrane	Hypothetical	NA	NA	NA	NA	NA	NA	integral component of membrane [GO:0016021]; plasma membrane [GO:0005886]
δE	sll1063	5'UTR	hypothetical protein	CytoplasmicMembrane	Hypothetical	NA	NA	NA	NA	GO:0006508 proteolysis	GO:0004222 metalloendopeptidase activity	NA
δE	sll1063	CDS	hypothetical protein	CytoplasmicMembrane	Hypothetical	NA	NA	NA	NA	GO:0006508 proteolysis	GO:0004222 metalloendopeptidase activity	NA
δE	sll1064	CDS	hypothetical protein	Unknown	Hypothetical	NA	NA	NA	NA	NA	acid phosphatase activity [GO:0003993]; metal ion binding [GO:0046872]	NA
δE	sll1072	3'UTR	hypothetical protein	Cytoplasmic	Hypothetical	NA	NA	NA	NA	NA	NA	NA
δE	sll1095	5'UTR	hypothetical protein	Cytoplasmic	Hypothetical	NA	NA	NA	NA	NA	NA	NA
δE	sll1095	CDS	hypothetical protein	Cytoplasmic	Hypothetical	NA	NA	NA	NA	NA	NA	NA
δE	sll1118	5'UTR	hypothetical protein	Unknown	Hypothetical	NA	NA	NA	NA	NA	NA	NA
δE	sll1142	5'UTR	hypothetical protein	Cytoplasmic	Hypothetical	NA	NA	NA	NA	NA	nuclease activity [GO:0004518]	NA
δE	sll1164	3'UTR	hypothetical protein	CytoplasmicMembrane	Hypothetical	NA	NA	NA	NA	NA	NA	GO:0016020 membrane
δE	sll1169	CDS	hypothetical protein	Unknown	Hypothetical	NA	NA	NA	NA	NA	NA	NA
δE	sll1173	CDS	hypothetical protein	Cytoplasmic	Hypothetical	NA	NA	NA	NA	NA	NA	NA
δE	sll1191	CDS	hypothetical protein	CytoplasmicMembrane	Hypothetical	NA	NA	NA	NA	NA	NA	integral component of plasma membrane [GO:0005887]
δE	sll1203	CDS	hypothetical protein	Cytoplasmic	Hypothetical	NA	NA	NA	NA	NA	NA	NA
δE	sll1251	5'UTR	hypothetical protein	Cytoplasmic	Hypothetical	NA	NA	NA	NA	NA	NA	NA
δE	sll1252	CDS	hypothetical protein	Cytoplasmic	Hypothetical	NA	NA	NA	NA	NA	RNA binding [GO:0003723]	plasma membrane-derived thylakoid photosystem II [GO:0030096]
δE	sll1274	5'UTR	hypothetical protein	Cytoplasmic	Hypothetical	NA	NA	NA	NA	NA	NA	NA
δE	sll1307	CDS	hypothetical protein	Cytoplasmic	Hypothetical	NA	NA	NA	NA	NA	NA	NA
δE	sll1318	CDS	hypothetical protein	Unknown	Hypothetical	NA	NA	NA	NA	NA	NA	NA
δE	sll1358	5'UTR	hypothetical protein	Unknown	Hypothetical	NA	NA	NA	NA	NA	NA	NA
δE	sll1367	CDS	hypothetical protein	Cytoplasmic	Hypothetical	NA	NA	NA	NA	regulation of transcription, DNA-templated [GO:0006355]	DNA binding [GO:0003677]	NA
δE	sll1367	3'UTR	hypothetical protein	Cytoplasmic	Hypothetical	NA	NA	NA	NA	regulation of transcription, DNA-templated [GO:0006355]	DNA binding [GO:0003677]	NA
δE	sll1386	CDS	hypothetical protein	Unknown	Hypothetical	NA	NA	NA	NA	NA	NA	NA
δE	sll1400	CDS	hypothetical protein	Unknown	Hypothetical	NA	NA	NA	NA	NA	NA	NA
δE	sll1411	CDS	hypothetical protein	Unknown	Hypothetical	NA	NA	NA	NA	NA	NA	NA
δE	sll1424	CDS	DUF3084 domain-containing protein	CytoplasmicMembrane	Hypothetical	NA	NA	NA	NA	NA	NA	NA
δE	sll1452	CDS	periplasmic protein, function unknown	Unknown	Hypothetical	NA	NA	NA	NA	NA	NA	outer membrane-bounded periplasmic space [GO:0030288]
δE	sll1455	3'UTR	hypothetical protein	Unknown	Hypothetical	NA	NA	NA	NA	NA	NA	NA
δE	sll1455	5'UTR	hypothetical protein	Unknown	Hypothetical	NA	NA	NA	NA	NA	NA	NA
δE	sll1477	3'UTR	hypothetical protein	CytoplasmicMembrane	Hypothetical	NA	NA	NA	NA	NA	NA	integral component of membrane [GO:0016021]
δE	sll1477	5'UTR	hypothetical protein	CytoplasmicMembrane	Hypothetical	NA	NA	NA	NA	NA	NA	NA
δE	sll1477	CDS	hypothetical protein	CytoplasmicMembrane	Hypothetical	NA	NA	NA	NA	NA	NA	NA
δE	sll1488	5'UTR	hypothetical protein	CytoplasmicMembrane	Hypothetical	NA	NA	NA	NA	NA	NA	NA
δE	sll1509	5'UTR	hypothetical protein YCF20	CytoplasmicMembrane	Hypothetical	NA	NA	NA	NA	NA	NA	NA
δE	sll1516	CDS	hypothetical protein	Cytoplasmic	Hypothetical	NA	NA	NA	NA	NA	NA	NA
δE	sll1543	CDS	hypothetical protein	Cytoplasmic	Hypothetical	NA	NA	NA	NA	NA	NA	NA
δE	sll1549	5'UTR	salt-enhanced periplasmic protein	Unknown	Hypothetical	NA	NA	NA	NA	NA	NA	outer membrane-bounded periplasmic space [GO:0030288]
δE	sll1577	5'UTR	hypothetical protein	CytoplasmicMembrane	Hypothetical	NA	NA	NA	NA	NA	NA	integral component of membrane [GO:0016021]
δE	sll1579	CDS	hypothetical protein	Unknown	Hypothetical	NA	NA	NA	NA	NA	NA	NA
δE	sll1580	CDS	hypothetical protein	CytoplasmicMembrane	Hypothetical	NA	NA	NA	NA	NA	NA	integral component of membrane [GO:0016021]
δE	sll1606	CDS	hypothetical protein	CytoplasmicMembrane	hypothetical	NA	NA	NA	NA	NA	NA	NA
δE	sll1628	5'UTR	hypothetical protein	Cytoplasmic	Hypothetical	NA	NA	NA	NA	NA	NA	NA
δE	sll1634	CDS	hypothetical protein	Cytoplasmic	Hypothetical	NA	NA	NA	NA	GO:0008152 metabolic process	GO:0016757 transferase activity, transferring glycosyl groups	NA
δE	sll1634	5'UTR	hypothetical protein	Cytoplasmic	Hypothetical	NA	NA	NA	NA	GO:0008152 metabolic process	GO:0016757 transferase activity, transferring glycosyl groups	NA
δE	sll1642	CDS	hypothetical protein	Unknown	Hypothetical	NA	NA	NA	NA	NA	NA	NA
δE	sll1642	5'UTR	hypothetical protein	Unknown	Hypothetical	NA	NA	NA	NA	NA	NA	NA
δE	sll1671	CDS	hypothetical protein	Unknown	Hypothetical	NA	NA	NA	NA	GO:0008152 metabolic process	GO:0008080 N-acetyltransferase activity	NA
δE	sll1686	CDS	hypothetical protein	Cytoplasmic	Hypothetical	NA	NA	NA	NA	NA	nucleic acid binding [GO:0003676]	NA
δE	sll1686	5'UTR	hypothetical protein	Cytoplasmic	Hypothetical	NA	NA	NA	NA	NA	nucleic acid binding [GO:0003676]	NA
δE	sll1693	5'UTR	hypothetical protein	Cytoplasmic	Hypothetical	NA	NA	NA	NA	methylation [GO:0032259]	S-adenosylmethionine-dependent methyltransferase activity [GO:0008757]	NA
δE	sll1715	CDS	hypothetical protein	Unknown	Hypothetical	NA	NA	NA	NA	NA	NA	NA
δE	sll1783	CDS	hypothetical protein	CytoplasmicMembrane	Hypothetical	NA	NA	NA	NA	response to biotic stimulus [GO:0009607]	NA	integral component of membrane [GO:0016021]
δE	sll1784	CDS	hypothetical protein	Unknown	Hypothetical	NA	NA	NA	NA	NA	NA	NA
δE	sll1797	CDS	hypothetical protein YCF21	Unknown	Hypothetical	NA	NA	NA	NA	NA	NA	NA
δE	sll1797	5'UTR	hypothetical protein YCF21	Unknown	Hypothetical	NA	NA	NA	NA	NA	NA	NA
δE	sll1890	CDS	hypothetical protein	Cytoplasmic	Hypothetical	NA	NA	NA	NA	NA	NA	NA
δE	sll1911	3'UTR	hypothetical protein	Unknown	Hypothetical	NA	NA	NA	NA	NA	NA	NA
δE	sll1911	5'UTR	hypothetical protein	Unknown	Hypothetical	NA	NA	NA	NA	NA	NA	NA
δE	sll1960	CDS	hypothetical protein	CytoplasmicMembrane	Hypothetical	NA	NA	NA	NA	NA	NA	integral component of membrane [GO:0016021]
δE	sll1960	3'UTR	hypothetical protein	CytoplasmicMembrane	Hypothetical	NA	NA	NA	NA	NA	NA	integral component of membrane [GO:0016021]
δE	sll1960	5'UTR	hypothetical protein	CytoplasmicMembrane	Hypothetical	NA	NA	NA	NA	NA	NA	integral component of membrane [GO:0016021]
δE	sll1965	CDS	hypothetical protein	Unknown	Hypothetical	NA	NA	NA	NA	NA	NA	NA
δE	sll2002	3'UTR	hypothetical protein	Unknown	Hypothetical	NA	NA	NA	NA	NA	NA	NA
δE	sll2002	5'UTR	hypothetical protein	Unknown	Hypothetical	NA	NA	NA	NA	NA	NA	NA
δE	sll5003	CDS	hypothetical protein	Cytoplasmic	Hypothetical	NA	NA	NA	NA	NA	NA	NA
δE	sll5003	3'UTR	hypothetical protein	Cytoplasmic	Hypothetical	NA	NA	NA	NA	NA	NA	NA
δE	sll5004	CDS	hypothetical protein	Cytoplasmic	hypothetical	NA	NA	NA	NA	NA	NA	NA
δE/δJ	sll5004	CDS	hypothetical protein	Cytoplasmic	Hypothetical	NA	NA	NA	NA	NA	NA	NA
δE	sll5004	5'UTR	hypothetical protein	Cytoplasmic	Hypothetical	NA	NA	NA	NA	NA	NA	NA
δE	sll5026	CDS	hypothetical protein	Cytoplasmic	Hypothetical	NA	NA	NA	NA	NA	NA	NA
δE	sll5028	CDS	hypothetical protein	Unknown	Hypothetical	NA	NA	NA	NA	NA	NA	NA
δE/δJ	sll5028	5'UTR	hypothetical protein	Unknown	Hypothetical	NA	NA	NA	NA	NA	NA	NA
δE/δJ	sll5061	CDS	hypothetical protein	Unknown	Hypothetical	NA	NA	NA	NA	NA	NA	NA
δE	sll5061	5'UTR	hypothetical protein	Unknown	Hypothetical	NA	NA	NA	NA	NA	NA	NA
δE	sll5067	CDS	hypothetical protein	Unknown	Hypothetical	NA	NA	NA	NA	NA	NA	NA
δE	sll5075	5'UTR	hypothetical protein	Unknown	Hypothetical	NA	NA	NA	NA	NA	NA	NA
δE	sll5076	CDS	hypothetical protein	Cytoplasmic	Hypothetical	NA	NA	NA	NA	riboflavin biosynthetic process [GO:0009231]; RNA modification [GO:0009451]	5-amino-6-(5-phosphoribosylamino)uracil reductase activity [GO:0008703]	NA
δE	sll5076	5'UTR	hypothetical protein	Cytoplasmic	Hypothetical	NA	NA	NA	NA	riboflavin biosynthetic process [GO:0009231]; RNA modification [GO:0009451]	5-amino-6-(5-phosphoribosylamino)uracil reductase activity [GO:0008703]	NA
δE	sll5130	CDS	hypothetical protein	Unknown	Hypothetical	NA	NA	NA	NA	NA	NA	NA
δE/δJ	sll6053	CDS	hypothetical protein	Cytoplasmic	Hypothetical	NA	NA	NA	NA	cellular protein modification process [GO:0006464]	ATP binding [GO:0005524]; magnesium ion binding [GO:0000287]; nucleotidyltransferase activity [GO:0016779]; small protein activating enzyme activity [GO:0008641]; zinc ion binding [GO:0008270]	cytosol [GO:0005829]
δE/δJ	sll6054	CDS	hypothetical protein	Unknown	Hypothetical	NA	NA	NA	NA	NA	NA	NA
δE/δJ	sll6055	CDS	hypothetical protein	Cytoplasmic	Hypothetical	NA	NA	NA	NA	NA	NA	NA
δE/δJ	sll6055	5'UTR	hypothetical protein	Cytoplasmic	Hypothetical	NA	NA	NA	NA	NA	NA	NA
δJ	sll6098	3'UTR	hypothetical protein	Cytoplasmic	Hypothetical	NA	NA	NA	NA	NA	NA	NA
δJ	sll7077	CDS	hypothetical protein	Unknown	Hypothetical	NA	NA	NA	NA	NA	GO:0003824 catalytic activity	NA
δE	sll8019	CDS	hypothetical protein	Unknown	Hypothetical	NA	NA	NA	NA	NA	NA	NA
δE	sll8020	CDS	hypothetical protein	Cytoplasmic	Hypothetical	NA	NA	NA	NA	regulation of transcription, DNA-templated [GO:0006355]; transcription, DNA-templated [GO:0006351]	DNA binding [GO:0003677]	NA
δE	sll8035	CDS	hypothetical protein	CytoplasmicMembrane	Hypothetical	NA	NA	NA	NA	NA	NA	NA
δE	slr0016	CDS	hypothetical protein	CytoplasmicMembrane	Hypothetical	NA	NA	NA	NA	NA	NA	integral component of membrane [GO:0016021]
δE	slr0016	5'UTR	hypothetical protein	CytoplasmicMembrane	Hypothetical	NA	NA	NA	NA	NA	NA	integral component of membrane [GO:0016021]
δE	slr0022	5'UTR	hypothetical protein	Cytoplasmic	Hypothetical	NA	NA	NA	NA	NA	NA	NA
δE	slr0065	CDS	hypothetical protein	Unknown	Hypothetical	NA	NA	NA	NA	NA	NA	NA
δE	slr0104	CDS	hypothetical protein	CytoplasmicMembrane	Hypothetical	NA	NA	NA	NA	NA	NA	integral component of membrane [GO:0016021]; plasma membrane [GO:0005886]
δE	slr0104	3'UTR	hypothetical protein	CytoplasmicMembrane	Hypothetical	NA	NA	NA	NA	NA	NA	integral component of membrane [GO:0016021]; plasma membrane [GO:0005886]
δE	slr0142	CDS	hypothetical protein	CytoplasmicMembrane	Hypothetical	NA	NA	NA	NA	NA	NA	NA
δE	slr0144	5'UTR	hypothetical protein	Unknown	Hypothetical	NA	NA	NA	NA	NA	NA	NA
δE	slr0169	3'UTR	hypothetical protein	Cytoplasmic	Hypothetical	NA	NA	NA	NA	NA	NA	NA
δJ	slr0179	5'UTR	hypothetical protein	Cytoplasmic	Hypothetical	NA	NA	NA	NA	NA	NA	NA
δJ	slr0179	CDS	hypothetical protein	Cytoplasmic	Hypothetical	NA	NA	NA	NA	NA	NA	NA
δE	slr0204	CDS	hypothetical protein YCF83	Unknown	Hypothetical	NA	NA	NA	NA	NA	GO:0016787 hydrolase activity	NA
δE	slr0232	CDS	hypothetical protein	CytoplasmicMembrane	Hypothetical	NA	NA	NA	NA	NA	NA	integral component of membrane [GO:0016021]; plasma membrane [GO:0005886]
δE	slr0249	CDS	hypothetical protein	Unknown	Hypothetical	NA	NA	NA	NA	regulation of transcription, DNA-templated [GO:0006355]	DNA binding [GO:0003677]	NA
δE	slr0249	3'UTR	hypothetical protein	Unknown	Hypothetical	NA	NA	NA	NA	regulation of transcription, DNA-templated [GO:0006355]	DNA binding [GO:0003677]	NA
δE	slr0264	CDS	hypothetical protein	Unknown	Hypothetical	NA	3.1.1.-	NA	NA	NA	carboxylic ester hydrolase activity [GO:0052689]	NA
δE	slr0265	CDS	hypothetical protein	Cytoplasmic	Hypothetical	NA	NA	NA	NA	NA	NA	NA
δE	slr0265	5'UTR	hypothetical protein	Cytoplasmic	Hypothetical	NA	NA	NA	NA	NA	NA	NA
δE	slr0270	CDS	hypothetical protein	Cytoplasmic	Hypothetical	NA	NA	NA	NA	NA	NA	NA
δE	slr0270	3'UTR	hypothetical protein	Cytoplasmic	Hypothetical	NA	NA	NA	NA	NA	NA	NA
δE	slr0292	CDS	hypothetical protein	CytoplasmicMembrane	Hypothetical	NA	NA	NA	NA	cobalamin biosynthetic process [GO:0009236]	sirohydrochlorin cobaltochelatase activity [GO:0016852]	NA
δE	slr0292	3'UTR	hypothetical protein	CytoplasmicMembrane	Hypothetical	NA	NA	NA	NA	cobalamin biosynthetic process [GO:0009236]	sirohydrochlorin cobaltochelatase activity [GO:0016852]	NA
δE	slr0292	5'UTR	hypothetical protein	CytoplasmicMembrane	Hypothetical	NA	NA	NA	NA	cobalamin biosynthetic process [GO:0009236]	sirohydrochlorin cobaltochelatase activity [GO:0016852]	NA
δE	slr0303	5'UTR	hypothetical protein	Cytoplasmic	Hypothetical	NA	NA	NA	NA	methylation [GO:0032259]	S-adenosylmethionine-dependent methyltransferase activity [GO:0008757]	NA
δE	slr0313	CDS	hypothetical protein	Unknown	Hypothetical	NA	NA	NA	NA	NA	GO:0015035 protein disulfide oxidoreductase activity	GO:0030288 outer membrane-bounded periplasmic space
δE	slr0320	5'UTR	hypothetical protein	Cytoplasmic	Hypothetical	NA	NA	NA	NA	tRNA methylthiolation [GO:0035600]	4 iron, 4 sulfur cluster binding [GO:0051539]; methylthiotransferase activity [GO:0035596]	cytosol [GO:0005829]
δE	slr0355	CDS	hypothetical protein	Unknown	Hypothetical	NA	NA	NA	NA	cellular amino acid metabolic process [GO:0006520]	oxidoreductase activity [GO:0016491]	NA
δJ	slr0355	5'UTR	hypothetical protein	Unknown	Hypothetical	NA	NA	NA	NA	cellular amino acid metabolic process [GO:0006520]	oxidoreductase activity [GO:0016491]	NA
δE	slr0356	CDS	hypothetical protein	Unknown	Hypothetical	NA	NA	NA	NA	NA	NA	NA
δE	slr0356	3'UTR	hypothetical protein	Unknown	Hypothetical	NA	NA	NA	NA	NA	NA	NA
δE	slr0363	CDS	hypothetical protein	Unknown	Hypothetical	NA	NA	NA	NA	NA	NA	NA
δJ	slr0373	CDS	hypothetical protein	Cytoplasmic	Hypothetical	NA	NA	NA	NA	regulation of transcription, DNA-templated [GO:0006355]	NA	NA
δE/δJ	slr0376	CDS	hypothetical protein	Unknown	Hypothetical	NA	NA	NA	NA	NA	NA	NA
δJ	slr0376	5'UTR	hypothetical protein	Unknown	Hypothetical	NA	NA	NA	NA	NA	NA	NA
δE	slr0397	5'UTR	hypothetical protein	CytoplasmicMembrane	Hypothetical	NA	NA	NA	NA	NA	NA	NA
δJ	slr0423	CDS	hypothetical protein	Unknown	Hypothetical	NA	NA	NA	NA	NA	NA	NA
δE	slr0440	5'UTR	hypothetical protein	Unknown	Hypothetical	NA	NA	NA	NA	NA	NA	NA
δE	slr0487	CDS	hypothetical protein	Cytoplasmic	Hypothetical	NA	NA	NA	NA	NA	phosphorelay sensor kinase activity [GO:0000155]	NA
δE	slr0487	5'UTR	hypothetical protein	Cytoplasmic	Hypothetical	NA	NA	NA	NA	NA	phosphorelay sensor kinase activity [GO:0000155]	intracellular [GO:0005622]
δE	slr0509	CDS	hypothetical protein	CytoplasmicMembrane	Hypothetical	NA	NA	NA	NA	NA	NA	integral component of membrane [GO:0016021]
δE	slr0509	5'UTR	hypothetical protein	CytoplasmicMembrane	Hypothetical	NA	NA	NA	NA	NA	NA	integral component of membrane [GO:0016021]
δE	slr0510	CDS	hypothetical protein	CytoplasmicMembrane	Hypothetical	NA	NA	NA	NA	transmembrane transport [GO:0055085]	NA	integral component of membrane [GO:0016021]
δE	slr0516	5'UTR	hypothetical protein	Extracellular	Hypothetical	NA	NA	NA	NA	NA	NA	NA
δE	slr0554	CDS	hypothetical protein	CytoplasmicMembrane	Hypothetical	NA	NA	NA	NA	NA	NA	NA
δE	slr0554	5'UTR	hypothetical protein	CytoplasmicMembrane	Hypothetical	NA	NA	NA	NA	NA	NA	NA
δE	slr0556	3'UTR	hypothetical protein	Cytoplasmic	Hypothetical	NA	NA	NA	COFACTOR: Name=pyridoxal 5'-phosphate; Xref=ChEBI:CHEBI:597326; Evidence={ECO:0000250};	NA	pyridoxal phosphate binding [GO:0030170]	NA
δE	slr0594	5'UTR	hypothetical protein	CytoplasmicMembrane	Hypothetical	NA	NA	NA	NA	NA	NA	integral component of membrane [GO:0016021]; plasma membrane [GO:0005886]
δE	slr0605	CDS	hypothetical protein	Cytoplasmic	Hypothetical	NA	NA	NA	NA	NA	NA	NA
δE	slr0605	3'UTR	hypothetical protein	Cytoplasmic	Hypothetical	NA	NA	NA	NA	NA	NA	NA
δE	slr0613	CDS	hypothetical protein	CytoplasmicMembrane	Hypothetical	NA	NA	NA	NA	NA	NA	integral component of membrane [GO:0016021]
δE	slr0613	5'UTR	hypothetical protein	CytoplasmicMembrane	Hypothetical	NA	NA	NA	NA	NA	NA	integral component of membrane [GO:0016021]
δE	slr0630	3'UTR	hypothetical protein	Cytoplasmic	Hypothetical	NA	NA	NA	NA	NA	NA	NA
δE	slr0655	CDS	hypothetical protein	Unknown	Hypothetical	NA	NA	NA	NA	NA	NA	NA
δE	slr0655	3'UTR	hypothetical protein	Unknown	Hypothetical	NA	NA	NA	NA	NA	NA	NA
δE	slr0656	CDS	hypothetical protein	Cytoplasmic	Hypothetical	NA	NA	NA	NA	NA	NA	NA
δE	slr0656	5'UTR	hypothetical protein	Cytoplasmic	Hypothetical	NA	NA	NA	NA	NA	NA	NA
δE	slr0688	CDS	hypothetical protein	Unknown	Hypothetical	NA	NA	NA	NA	NA	NA	NA
δE	slr0723	CDS	hypothetical protein	Cytoplasmic	Hypothetical	NA	NA	NA	NA	NA	NA	NA
δE	slr0723	5'UTR	hypothetical protein	Cytoplasmic	Hypothetical	NA	NA	NA	NA	NA	NA	NA
δE	slr0723	3'UTR	hypothetical protein	Cytoplasmic	Hypothetical	NA	NA	NA	NA	NA	NA	NA
δE	slr0725	CDS	hypothetical protein	Unknown	Hypothetical	NA	NA	NA	NA	NA	NA	NA
δE	slr0729	CDS	Thylakoid-membrane protein, function unknown	Unknown	Hypothetical	NA	NA	NA	NA	NA	NA	thylakoid membrane [GO:0042651]
δE	slr0729	5'UTR	Thylakoid-membrane protein, function unknown	Unknown	Hypothetical	NA	NA	NA	NA	NA	NA	thylakoid membrane [GO:0042651]
δE	slr0731	CDS	hypothetical protein	CytoplasmicMembrane	Hypothetical	NA	NA	NA	NA	NA	NA	NA
δE	slr0732	5'UTR	hypothetical protein	CytoplasmicMembrane	Hypothetical	NA	NA	NA	NA	NA	NA	integral component of membrane [GO:0016021]
δE	slr0755	CDS	hypothetical protein	Unknown	Hypothetical	NA	NA	NA	NA	NA	NA	NA
δE	slr0755	5'UTR	hypothetical protein	Unknown	Hypothetical	NA	NA	NA	NA	NA	NA	NA
δE	slr0771	3'UTR	hypothetical protein	Unknown	Hypothetical	NA	NA	NA	NA	NA	NA	NA
δE	slr0779	CDS	hypothetical protein	CytoplasmicMembrane	Hypothetical	NA	NA	NA	NA	NA	NA	integral component of membrane [GO:0016021]
δE	slr0779	5'UTR	hypothetical protein	CytoplasmicMembrane	Hypothetical	NA	NA	NA	NA	NA	NA	integral component of membrane [GO:0016021]
δE	slr0779	3'UTR	hypothetical protein	CytoplasmicMembrane	Hypothetical	NA	NA	NA	NA	NA	NA	integral component of membrane [GO:0016021]
δE	slr0789	CDS	HPP family protein	CytoplasmicMembrane	Hypothetical	NA	NA	NA	NA	NA	NA	NA
δE/δJ	slr0789	5'UTR	HPP family protein	CytoplasmicMembrane	Hypothetical	NA	NA	NA	NA	NA	NA	NA
δE	slr0812	5'UTR	hypothetical protein	CytoplasmicMembrane	Hypothetical	NA	NA	NA	NA	GO:0045941 positive regulation of transcription	GO:0016563 transcription activator activity	NA
δE	slr0816	CDS	hypothetical protein	Cytoplasmic	Hypothetical	NA	NA	NA	NA	NA	NA	NA
δE	slr0816	3'UTR	hypothetical protein	Cytoplasmic	Hypothetical	NA	NA	NA	NA	NA	NA	NA
δE	slr0818	CDS	hypothetical protein	CytoplasmicMembrane	Hypothetical	NA	NA	NA	NA	NA	NA	integral component of membrane [GO:0016021]
δE	slr0842	3'UTR	hypothetical protein	CytoplasmicMembrane	Hypothetical	NA	NA	NA	NA	NA	NA	NA
δJ	slr0869	5'UTR	hypothetical protein	Cytoplasmic	Hypothetical	NA	NA	NA	NA	NA	GTPase activity [GO:0003924]	NA
δJ	slr0869	CDS	hypothetical protein	Cytoplasmic	Hypothetical	NA	NA	NA	NA	NA	GTPase activity [GO:0003924]	NA
δE	slr0878	CDS	hypothetical protein	OuterMembrane	Hypothetical	NA	NA	NA	NA	NA	NA	NA
δE	slr0888	CDS	hypothetical protein	CytoplasmicMembrane	Hypothetical	NA	NA	NA	NA	NA	NA	NA
δE	slr0941	CDS	hypothetical protein	Unknown	Hypothetical	NA	NA	NA	NA	NA	NA	NA
δE	slr0941	3'UTR	hypothetical protein	Unknown	Hypothetical	NA	NA	NA	NA	NA	NA	NA
δE	slr0948	3'UTR	hypothetical protein	Unknown	Hypothetical	NA	NA	NA	NA	NA	NA	integral component of membrane [GO:0016021]
δE	slr0990	5'UTR	hypothetical protein	Unknown	Hypothetical	NA	NA	NA	NA	cellular modified amino acid biosynthetic process [GO:0042398]	glutamate-cysteine ligase activity [GO:0004357]	NA
δJ	slr1002	5'UTR	hypothetical protein	CytoplasmicMembrane	Hypothetical	NA	NA	NA	NA	NA	NA	NA
δE	slr1025	CDS	hypothetical protein	Unknown	Hypothetical	NA	NA	NA	NA	NA	NA	NA
δE	slr1095	5'UTR	hypothetical protein	Cytoplasmic	Hypothetical	NA	NA	NA	NA	NA	NA	NA
δE	slr1110	CDS	hypothetical protein	CytoplasmicMembrane	Hypothetical	NA	NA	NA	NA	NA	NA	NA
δE	slr1114	CDS	hypothetical protein	CytoplasmicMembrane	Hypothetical	NA	NA	NA	NA	NA	NA	integral component of membrane [GO:0016021]
δE	slr1116	CDS	hypothetical protein	Unknown	Hypothetical	NA	NA	NA	NA	NA	NA	NA
δE	slr1117	CDS	hypothetical protein	Cytoplasmic	Hypothetical	NA	NA	NA	NA	NA	NA	NA
δE	slr1117	3'UTR	hypothetical protein	Cytoplasmic	Hypothetical	NA	NA	NA	NA	NA	NA	NA
δE	slr1119	CDS	hypothetical protein	Cytoplasmic	Hypothetical	NA	NA	NA	NA	NA	lysophospholipase activity [GO:0004622]	NA
δE	slr1119	3'UTR	hypothetical protein	Cytoplasmic	Hypothetical	NA	NA	NA	NA	NA	lysophospholipase activity [GO:0004622]	NA
δE	slr1122	CDS	hypothetical protein	Cytoplasmic	Hypothetical	NA	NA	NA	NA	NA	NA	NA
δE	slr1122	3'UTR	hypothetical protein	Cytoplasmic	Hypothetical	NA	NA	NA	NA	NA	NA	NA
δE	slr1122	5'UTR	hypothetical protein	Cytoplasmic	Hypothetical	NA	NA	NA	NA	NA	NA	NA
δE	slr1160	5'UTR	periplasmic protein, function unknown	Unknown	Hypothetical	NA	NA	NA	NA	NA	NA	outer membrane-bounded periplasmic space [GO:0030288]
δE	slr1170	CDS	hypothetical protein	CytoplasmicMembrane	Hypothetical	NA	NA	NA	NA	NA	NA	integral component of membrane [GO:0016021]
δE	slr1170	5'UTR	hypothetical protein	CytoplasmicMembrane	Hypothetical	NA	NA	NA	NA	NA	NA	integral component of membrane [GO:0016021]
δE	slr1223	5'UTR	hypothetical protein	Cytoplasmic	Hypothetical	NA	NA	NA	NA	NA	catalytic activity [GO:0003824]; coenzyme binding [GO:0050662]	NA
δE/δJ	slr1260	CDS	hypothetical protein	Unknown	Hypothetical	NA	NA	NA	NA	NA	NA	NA
δJ	slr1261	CDS	hypothetical protein	CytoplasmicMembrane	Hypothetical	NA	NA	NA	NA	NA	NA	integral component of membrane [GO:0016021]; plasma membrane [GO:0005886]
δE	slr1262	3'UTR	hypothetical protein	CytoplasmicMembrane	Hypothetical	NA	NA	NA	NA	NA	NA	integral component of membrane [GO:0016021]; plasma membrane [GO:0005886]
δE	slr1263	5'UTR	hypothetical protein	Unknown	Hypothetical	NA	NA	NA	NA	NA	NA	NA
δE	slr1266	5'UTR	hypothetical protein	Unknown	Hypothetical	NA	NA	NA	NA	NA	NA	NA
δE	slr1287	CDS	hypothetical protein	Unknown	Hypothetical	NA	NA	NA	NA	NA	NA	NA
δE	slr1288	CDS	hypothetical protein	CytoplasmicMembrane	Hypothetical	NA	NA	NA	NA	NA	NA	integral component of membrane [GO:0016021]
δE	slr1288	3'UTR	hypothetical protein	CytoplasmicMembrane	Hypothetical	NA	NA	NA	NA	NA	NA	integral component of membrane [GO:0016021]
δE	slr1301	3'UTR	hypothetical protein	Cytoplasmic	Hypothetical	NA	NA	NA	NA	NA	NA	NA
δE	slr1303	CDS	hypothetical protein	Unknown	Hypothetical	NA	NA	NA	NA	ergothioneine biosynthetic process [GO:0052699]	NA	NA
δE	slr1327	3'UTR	hypothetical protein	Unknown	Hypothetical	NA	NA	NA	NA	NA	NA	NA
δE	slr1362	CDS	hypothetical protein	Unknown	Hypothetical	NA	NA	NA	NA	NA	NA	NA
δE	slr1362	3'UTR	hypothetical protein	Unknown	Hypothetical	NA	NA	NA	NA	NA	NA	NA
δE	slr1362	5'UTR	hypothetical protein	Unknown	Hypothetical	NA	NA	NA	NA	NA	NA	NA
δE	slr1378	CDS	hypothetical protein	Cytoplasmic	Hypothetical	NA	NA	NA	NA	NA	NA	NA
δE	slr1384	CDS	hypothetical protein	CytoplasmicMembrane	Hypothetical	NA	NA	NA	NA	NA	NA	NA
δE	slr1394	5'UTR	hypothetical protein	CytoplasmicMembrane	Hypothetical	NA	NA	NA	NA	NA	NA	integral component of membrane [GO:0016021]
δE	slr1411	CDS	hypothetical protein	Cytoplasmic	Hypothetical	NA	NA	NA	NA	NA	NA	NA
δE	slr1411	3'UTR	hypothetical protein	Cytoplasmic	Hypothetical	NA	NA	NA	NA	NA	NA	NA
δE	slr1441	CDS	hypothetical protein	Cytoplasmic	Hypothetical	NA	NA	NA	NA	NA	NA	NA
δE	slr1444	5'UTR	hypothetical protein	Cytoplasmic	Hypothetical	NA	NA	NA	NA	NA	NA	NA
δE	slr1462	CDS	hypothetical protein	CytoplasmicMembrane	Hypothetical	NA	NA	NA	NA	NA	GTP binding [GO:0005525]	integral component of membrane [GO:0016021]
δE	slr1468	CDS	hypothetical protein	Unknown	Hypothetical	NA	NA	NA	NA	NA	NA	NA
δE	slr1472	3'UTR	hypothetical protein	Cytoplasmic	Hypothetical	NA	NA	NA	NA	NA	nucleic acid binding [GO:0003676]	NA
δE	slr1474	CDS	hypothetical protein	Cytoplasmic	Hypothetical	NA	NA	NA	NA	NA	NA	NA
δE	slr1474	3'UTR	hypothetical protein	Cytoplasmic	Hypothetical	NA	NA	NA	NA	NA	NA	NA
δE	slr1493	CDS	hypothetical protein	Unknown	Hypothetical	NA	NA	NA	NA	NA	NA	NA
δE	slr1495	CDS	hypothetical protein	CytoplasmicMembrane	Hypothetical	NA	NA	NA	NA	NA	NA	NA
δE	slr1495	5'UTR	hypothetical protein	CytoplasmicMembrane	Hypothetical	NA	NA	NA	NA	NA	NA	NA
δE	slr1530	CDS	hypothetical protein	Cytoplasmic	Hypothetical	NA	NA	NA	NA	NA	NA	NA
δE	slr1530	3'UTR	hypothetical protein	Cytoplasmic	Hypothetical	NA	NA	NA	NA	NA	NA	NA
δE	slr1547	CDS	hypothetical protein	CytoplasmicMembrane	Hypothetical	NA	NA	NA	NA	NA	NA	integral component of membrane [GO:0016021]
δE	slr1547	3'UTR	hypothetical protein	CytoplasmicMembrane	Hypothetical	NA	NA	NA	NA	NA	NA	integral component of membrane [GO:0016021]
δE	slr1557	3'UTR	hypothetical protein	Cytoplasmic	Hypothetical	NA	NA	NA	NA	NA	NA	NA
δE	slr1563	CDS	hypothetical protein	Unknown	Hypothetical	NA	NA	NA	NA	NA	kinase activity [GO:0016301]	NA
δE	slr1573	CDS	hypothetical protein	Cytoplasmic	Hypothetical	NA	NA	NA	NA	NA	NA	NA
δE	slr1573	3'UTR	hypothetical protein	Cytoplasmic	Hypothetical	NA	NA	NA	NA	NA	NA	NA
δE	slr1573	5'UTR	hypothetical protein	Cytoplasmic	Hypothetical	NA	NA	NA	NA	NA	NA	NA
δE	slr1579	5'UTR	hypothetical protein	Unknown	Hypothetical	NA	NA	NA	NA	NA	NA	NA
δE	slr1591	CDS	hypothetical protein	CytoplasmicMembrane	Hypothetical	NA	NA	NA	NA	NA	oxidoreductase activity [GO:0016491]	NA
δE	slr1599	3'UTR	hypothetical protein	CytoplasmicMembrane	Hypothetical	NA	NA	NA	NA	NA	NA	integral component of membrane [GO:0016021]
δE	slr1599	5'UTR	hypothetical protein	CytoplasmicMembrane	Hypothetical	NA	NA	NA	NA	NA	NA	integral component of membrane [GO:0016021]
δE	slr1601	3'UTR	hypothetical protein	Unknown	Hypothetical	NA	NA	NA	NA	NA	NA	integral component of membrane [GO:0016021]
δE	slr1613	3'UTR	hypothetical protein	Cytoplasmic	Hypothetical	NA	NA	NA	NA	NA	NA	NA
δE	slr1638	5'UTR	hypothetical protein	Unknown	Hypothetical	NA	NA	NA	NA	NA	NA	NA
δE	slr1648	5'UTR	hypothetical protein	Unknown	Hypothetical	NA	NA	NA	NA	NA	oxidoreductase activity, acting on single donors with incorporation of molecular oxygen, incorporation of two atoms of oxygen [GO:0016702]	NA
δE	slr1657	5'UTR	hypothetical protein	Cytoplasmic	Hypothetical	NA	NA	NA	NA	NA	NA	NA
δE	slr1659	3'UTR	hypothetical protein	Unknown	Hypothetical	NA	NA	NA	NA	NA	NA	NA
δE	slr1686	CDS	hypothetical protein	Unknown	Hypothetical	NA	NA	NA	NA	NA	NA	NA
δE	slr1686	3'UTR	hypothetical protein	Unknown	Hypothetical	NA	NA	NA	NA	NA	NA	NA
δE	slr1686	5'UTR	hypothetical protein	Unknown	Hypothetical	NA	NA	NA	NA	NA	NA	NA
δE	slr1690	CDS	hypothetical protein	Unknown	Hypothetical	NA	NA	NA	NA	NA	hydrolase activity [GO:0016787]	NA
δE	slr1692	5'UTR	hypothetical protein	CytoplasmicMembrane	Hypothetical	NA	NA	NA	NA	NA	NA	NA
δJ	slr1704	3'UTR	hypothetical protein	CytoplasmicMembrane	Hypothetical	NA	NA	NA	NA	NA	NA	NA
δE	slr1807	CDS	hypothetical protein	Unknown	Hypothetical	NA	NA	NA	NA	NA	NA	NA
δE	slr1819	CDS	hypothetical protein	Extracellular	Hypothetical	NA	NA	NA	NA	NA	NA	NA
δE	slr1819	3'UTR	hypothetical protein	Extracellular	Hypothetical	NA	NA	NA	NA	NA	NA	NA
δE	slr1819	5'UTR	hypothetical protein	Extracellular	Hypothetical	NA	NA	NA	NA	NA	NA	NA
δJ	slr1885	3'UTR	hypothetical protein	Cytoplasmic	Hypothetical	NA	NA	NA	NA	NA	NA	NA
δJ	slr1885	CDS	hypothetical protein	Cytoplasmic	Hypothetical	NA	NA	NA	NA	NA	NA	NA
δE	slr1885	3'UTR	hypothetical protein	Cytoplasmic	Hypothetical	NA	NA	NA	NA	NA	NA	NA
δE	slr1896	CDS	hypothetical protein	Unknown	Hypothetical	NA	NA	NA	NA	NA	NA	NA
δE	slr1896	3'UTR	hypothetical protein	Unknown	Hypothetical	NA	NA	NA	NA	NA	NA	NA
δE	slr1896	5'UTR	hypothetical protein	Unknown	Hypothetical	NA	NA	NA	NA	NA	NA	NA
δE	slr1906	CDS	hypothetical protein	Unknown	Hypothetical	NA	NA	NA	NA	N-terminal protein amino acid acetylation [GO:0006474]	peptide alpha-N-acetyltransferase activity [GO:0004596]	protein acetyltransferase complex [GO:0031248]
δE	slr1906	5'UTR	hypothetical protein	Unknown	Hypothetical	NA	NA	NA	NA	N-terminal protein amino acid acetylation [GO:0006474]	peptide alpha-N-acetyltransferase activity [GO:0004596]	protein acetyltransferase complex [GO:0031248]
δE	slr1911	5'UTR	hypothetical protein	Unknown	Hypothetical	NA	NA	NA	NA	NA	NA	NA
δE	slr1917	CDS	hypothetical protein	Unknown	Hypothetical	NA	NA	NA	NA	NA	hydrolase activity [GO:0016787]	NA
δE	slr1917	5'UTR	hypothetical protein	Unknown	Hypothetical	NA	NA	NA	NA	NA	hydrolase activity [GO:0016787]	NA
δE	slr1926	CDS	hypothetical protein	Unknown	Hypothetical	NA	NA	NA	NA	NA	NA	NA
δE	slr1926	5'UTR	hypothetical protein	Unknown	Hypothetical	NA	NA	NA	NA	NA	NA	NA
δE	slr1927	CDS	DUF58 domain-containing protein	CytoplasmicMembrane	Hypothetical	NA	NA	NA	NA	NA	NA	integral component of membrane [GO:0016021]
δE	slr1927	3'UTR	DUF58 domain-containing protein	CytoplasmicMembrane	Hypothetical	NA	NA	NA	NA	NA	NA	integral component of membrane [GO:0016021]
δE	slr1946	CDS	hypothetical protein	Unknown	Hypothetical	NA	NA	NA	NA	NA	metalloendopeptidase activity [GO:0004222]; zinc ion binding [GO:0008270]	extracellular matrix [GO:0031012]
δE	slr1951	CDS	hypothetical protein	Cytoplasmic	Hypothetical	NA	NA	NA	NA	NA	NA	NA
δE	slr1957	3'UTR	hypothetical protein	Unknown	Hypothetical	NA	NA	NA	NA	NA	NA	NA
δE	slr1957	5'UTR	hypothetical protein	Unknown	Hypothetical	NA	NA	NA	NA	NA	NA	NA
δE	slr1957	CDS	hypothetical protein	Unknown	Hypothetical	NA	NA	NA	NA	NA	NA	NA
δE	slr1970	CDS	hypothetical protein	Cytoplasmic	Hypothetical	NA	NA	NA	NA	NA	NA	NA
δE	slr1970	3'UTR	hypothetical protein	Cytoplasmic	Hypothetical	NA	NA	NA	NA	NA	NA	NA
δE	slr1977	CDS	hypothetical protein	Unknown	Hypothetical	NA	NA	NA	NA	nucleoside metabolic process [GO:0009116]	catalytic activity [GO:0003824]	NA
δE	slr1977	3'UTR	hypothetical protein	Unknown	Hypothetical	NA	NA	NA	NA	nucleoside metabolic process [GO:0009116]	catalytic activity [GO:0003824]	NA
δE	slr1977	5'UTR	hypothetical protein	Unknown	Hypothetical	NA	NA	NA	NA	nucleoside metabolic process [GO:0009116]	catalytic activity [GO:0003824]	NA
δE	slr2000	CDS	hypothetical protein	Unknown	Hypothetical	NA	NA	NA	NA	NA	NA	NA
δE	slr2006	5'UTR	hypothetical protein	CytoplasmicMembrane	Hypothetical	NA	NA	NA	NA	ATP synthesis coupled electron transport [GO:0042773]	oxidoreductase activity, acting on NAD(P)H [GO:0016651]	integral component of membrane [GO:0016021]
δE	slr2030	CDS	hypothetical protein	Cytoplasmic	Hypothetical	NA	NA	NA	NA	NA	catalytic activity [GO:0003824]	NA
δE	slr2030	5'UTR	hypothetical protein	Cytoplasmic	Hypothetical	NA	NA	NA	NA	NA	catalytic activity [GO:0003824]	NA
δE	slr2060	CDS	hypothetical protein	Cytoplasmic	Hypothetical	NA	NA	NA	NA	NA	transferase activity, transferring acyl groups [GO:0016746]	NA
δE	slr2060	3'UTR	hypothetical protein	Cytoplasmic	Hypothetical	NA	NA	NA	NA	NA	transferase activity, transferring acyl groups [GO:0016746]	NA
δE	slr2078	CDS	hypothetical protein	Unknown	Hypothetical	NA	NA	NA	NA	NA	hydrolase activity [GO:0016787]	NA
δE	slr2127	CDS	hypothetical protein	Cytoplasmic	Hypothetical	NA	NA	NA	NA	NA	nuclease activity [GO:0004518]; nucleic acid binding [GO:0003676]	NA
δE	slr5005	CDS	hypothetical protein	Extracellular	Hypothetical	NA	NA	NA	NA	cell adhesion [GO:0007155]; cell communication [GO:0007154]	NA	integrin complex [GO:0008305]
δE	slr5021	CDS	hypothetical protein	Unknown	Hypothetical	NA	NA	NA	NA	NA	sequence-specific DNA binding [GO:0043565]	NA
δE	slr5023	CDS	hypothetical protein	Cytoplasmic	Hypothetical	NA	NA	NA	NA	NA	ATP binding [GO:0005524]	NA
δE	slr5024	CDS	hypothetical protein	Cytoplasmic	Hypothetical	NA	NA	NA	NA	NA	NA	NA
δE	slr5037	CDS	hypothetical protein	Unknown	Hypothetical	NA	NA	NA	NA	NA	NA	NA
δE	slr5037	5'UTR	hypothetical protein	Unknown	Hypothetical	NA	NA	NA	NA	NA	NA	NA
δE	slr5058	CDS	hypothetical protein	Cytoplasmic	Hypothetical	NA	NA	NA	NA	NA	NA	NA
δJ	slr5087	CDS	hypothetical protein	Unknown	Hypothetical	NA	NA	NA	NA	NA	NA	NA
δE	slr5101	CDS	hypothetical protein	Unknown	Hypothetical	NA	NA	NA	NA	NA	NA	NA
δE	slr5102	CDS	hypothetical protein	Cytoplasmic	Hypothetical	NA	NA	NA	NA	NA	NA	NA
δE	slr5115	5'UTR	hypothetical protein	Unknown	Hypothetical	NA	NA	NA	NA	rescue of stalled ribosome [GO:0072344]	aminoacyl-tRNA hydrolase activity [GO:0004045]; ribosome binding [GO:0043022]; translation release factor activity, codon nonspecific [GO:0016150]	NA
δE	slr5116	CDS	hypothetical protein	Cytoplasmic	Hypothetical	NA	NA	NA	NA	NA	NA	NA
δE	slr6058	CDS	hypothetical protein	Unknown	Hypothetical	NA	NA	NA	NA	NA	NA	NA
δE	slr6058	5'UTR	hypothetical protein	Unknown	Hypothetical	NA	NA	NA	NA	NA	NA	NA
δJ	slr6106	CDS	hypothetical protein	Cytoplasmic	Hypothetical	NA	NA	NA	NA	NA	NA	NA
δJ	slr6107	CDS	hypothetical protein	Unknown	Hypothetical	NA	NA	NA	NA	NA	NA	NA
δJ	slr7023	5'UTR	hypothetical protein	Cytoplasmic	Hypothetical	NA	NA	NA	NA	NA	NA	NA
δJ	slr7037	CDS	hypothetical protein	Cytoplasmic	Hypothetical	NA	NA	NA	NA	NA	NA	NA
δE	slr7037	3'UTR	hypothetical protein	Cytoplasmic	Hypothetical	NA	NA	NA	NA	NA	NA	NA
δE	slr7037	5'UTR	hypothetical protein	Cytoplasmic	Hypothetical	NA	NA	NA	NA	NA	NA	NA
δJ	slr7095	CDS	Zeta toxin	Cytoplasmic	Hypothetical	NA	NA	NA	NA	NA	NA	NA
δJ	slr7096	CDS	hypothetical protein	Unknown	Hypothetical	NA	NA	NA	NA	NA	NA	NA
δJ	slr7097	CDS	hypothetical protein	Unknown	Hypothetical	NA	NA	NA	NA	DNA repair [GO:0006281]	oxidoreductase activity [GO:0016491]	NA
δJ	slr7097	5'UTR	hypothetical protein	Unknown	Hypothetical	NA	NA	NA	NA	DNA repair [GO:0006281]	oxidoreductase activity [GO:0016491]	NA
δJ	slr7102	CDS	hypothetical protein	Unknown	Hypothetical	NA	NA	NA	NA	NA	catalytic activity [GO:0003824]	NA
δE	slr8021	CDS	hypothetical protein	Cytoplasmic	Hypothetical	NA	NA	NA	NA	GO:0008610 lipid biosynthetic process	GO:0008825 cyclopropane-fatty-acyl-phospholipid synthase activity	NA
δE	ssl0511	3'UTR	hypothetical protein	Unknown	Hypothetical	NA	NA	NA	NA	regulation of transcription, DNA-templated [GO:0006355]	NA	NA
δE/δJ	ssl1046	CDS	hypothetical protein	CytoplasmicMembrane	Hypothetical	NA	NA	NA	NA	response to biotic stimulus [GO:0009607]	NA	integral component of membrane [GO:0016021]
δE/δJ	ssl1046	5'UTR	hypothetical protein	CytoplasmicMembrane	Hypothetical	NA	NA	NA	NA	response to biotic stimulus [GO:0009607]	NA	integral component of membrane [GO:0016021]
δE	ssl1577	3'UTR	hypothetical protein	cytoplasmic	Hypothetical	NA	NA	NA	NA	NA	NA	NA
δE	ssl1807	3'UTR	hypothetical protein	CytoplasmicMembrane	Hypothetical	NA	NA	NA	NA	NA	NA	integral component of membrane [GO:0016021]
δE	ssl2069	CDS	hypothetical protein	CytoplasmicMembrane	Hypothetical	NA	NA	NA	NA	NA	NA	integral component of membrane [GO:0016021]
δE	ssl2069	5'UTR	hypothetical protein	CytoplasmicMembrane	Hypothetical	NA	NA	NA	NA	NA	NA	integral component of membrane [GO:0016021]
δE	ssl2874	3'UTR	hypothetical protein	Unknown	Hypothetical	NA	NA	NA	NA	NA	NA	NA
δE	ssl3451	5'UTR	hypothetical protein	Unknown	Hypothetical	NA	NA	NA	NA	NA	NA	NA
δE	ssl3829	CDS	hypothetical protein	Unknown	Hypothetical	NA	NA	NA	NA	NA	NA	NA
δE	ssl5025	CDS	hypothetical protein	Unknown	Hypothetical	NA	NA	NA	NA	NA	NA	NA
δE	ssl5025	3'UTR	hypothetical protein	Unknown	Hypothetical	NA	NA	NA	NA	NA	NA	NA
δE	ssl5025	5'UTR	hypothetical protein	Unknown	Hypothetical	NA	NA	NA	NA	NA	NA	NA
δE	ssl5100	CDS	hypothetical protein	Unknown	Hypothetical	NA	NA	NA	NA	NA	NA	NA
δE	ssl5129	CDS	hypothetical protein	Cytoplasmic	Hypothetical	NA	NA	NA	NA	NA	NA	NA
δE	ssl7053	CDS	hypothetical protein	Periplasmic	Hypothetical	NA	NA	NA	NA	GO:0006353 transcription termination	GO:0003715 transcription termination factor activity	NA
δE	ssr0349	3'UTR	hypothetical protein	CytoplasmicMembrane	Hypothetical	NA	NA	NA	NA	NA	NA	integral component of membrane [GO:0016021]
δE	ssr0761	CDS	hypothetical protein	Unknown	Hypothetical	NA	NA	NA	NA	NA	NA	NA
δE	ssr1041	3'UTR	hypothetical protein	Unknown	Hypothetical	NA	NA	NA	NA	NA	electron carrier activity [GO:0009055]; iron-sulfur cluster binding [GO:0051536]; metal ion binding [GO:0046872]	NA
δE	ssr1114	5'UTR	hypothetical protein	Cytoplasmic	Hypothetical	NA	NA	NA	NA	NA	NA	NA
δJ	ssr1155	CDS	hypothetical protein	Unknown	Hypothetical	NA	NA	NA	NA	NA	NA	NA
δE	ssr1258	CDS	hypothetical protein	Unknown	Hypothetical	NA	NA	NA	NA	NA	NA	NA
δE	ssr1391	CDS	hypothetical protein	Unknown	Hypothetical	NA	NA	NA	NA	NA	NA	NA
δE	ssr1407	CDS	hypothetical protein	Unknown	Hypothetical	NA	NA	NA	NA	NA	NA	NA
δE	ssr1499	CDS	hypothetical protein	CytoplasmicMembrane	Hypothetical	NA	NA	NA	NA	NA	NA	NA
δE	ssr1513	CDS	hypothetical protein	cytoplasmic	Hypothetical	NA	NA	NA	NA	GO:0009086 methionine biosynthetic process	GO:0008705 methionine synthase activity	GO:0005622 intracellular
δE	ssr2016	CDS	hypothetical protein/PGR5 protein	Cytoplasmic	Hypothetical	NA	NA	NA	NA	NA	NA	NA
δE	ssr2062	CDS	hypothetical protein	Unknown	Hypothetical	NA	NA	NA	NA	NA	NA	NA
δE	ssr2062	3'UTR	hypothetical protein	Unknown	Hypothetical	NA	NA	NA	NA	NA	NA	NA
δE	ssr2340	3'UTR	hypothetical protein	CytoplasmicMembrane	Hypothetical	NA	NA	NA	NA	NA	NA	NA
δE	ssr2439	CDS	hypothetical protein	Unknown	Hypothetical	NA	NA	NA	NA	NA	NA	NA
δE	ssr2551	CDS	hypothetical protein	Unknown	Hypothetical	NA	NA	NA	NA	NA	NA	NA
δE	ssr2781	3'UTR	hypothetical protein	Unknown	Hypothetical	NA	NA	NA	NA	NA	NA	NA
δE	ssr2803	3'UTR	hypothetical protein	Unknown	Hypothetical	NA	NA	NA	NA	NA	NA	NA
δE	ssr3000	CDS	hypothetical protein	Unknown	Hypothetical	NA	NA	NA	NA	NA	NA	NA
δE	ssr3000	3'UTR	hypothetical protein	Unknown	Hypothetical	NA	NA	NA	NA	NA	NA	NA
δE	ssr3154	5'UTR	hypothetical protein	Cytoplasmic	Hypothetical	NA	NA	NA	NA	NA	NA	NA
δE	ssr3188	3'UTR	hypothetical protein	Unknown	Hypothetical	NA	NA	NA	NA	NA	NA	NA
δE	ssr5011	CDS	hypothetical protein	Unknown	Hypothetical	NA	NA	NA	NA	NA	NA	NA
δE	ssr5019	CDS	hypothetical protein	Unknown	Hypothetical	NA	NA	NA	NA	NA	NA	NA
δE	ssr5020	CDS	hypothetical protein	Cytoplasmic	Hypothetical	NA	NA	NA	NA	GO:0008152 metabolic process	GO:0003824 catalytic activity GO:0030170 pyridoxal phosphate binding	NA
δE	ssr5020	5'UTR	hypothetical protein	Unknown	Hypothetical	NA	NA	NA	NA	NA	NA	NA
δE	ssr5092	CDS	hypothetical protein	Unknown	Hypothetical	NA	NA	NA	NA	NA	NA	NA
δE	ssr5117	CDS	hypothetical protein	Unknown	Hypothetical	NA	NA	NA	NA	regulation of transcription, DNA-templated [GO:0006355]	NA	NA
δE	ssr5121	CDS	hypothetical protein	CytoplasmicMembrane	Hypothetical	NA	NA	NA	NA	NA	NA	NA
δE	ssr6046	CDS	hypothetical protein	Unknown	Hypothetical	NA	NA	NA	NA	NA	NA	NA
δE	sll0210	CDS	bacitracin resistance protein	CytoplasmicMembrane	Other categories	Drug and analog sensitivity	3.6.1.27	CATALYTIC ACTIVITY: Ditrans,octacis-undecaprenyl diphosphate + H(2)O = ditrans,octacis-undecaprenyl phosphate + phosphate. {ECO:0000255|HAMAP-Rule:MF_01006}.	NA	cell wall organization [GO:0071555]; dephosphorylation [GO:0016311]; peptidoglycan biosynthetic process [GO:0009252]; regulation of cell shape [GO:0008360]; response to antibiotic [GO:0046677]	undecaprenyl-diphosphatase activity [GO:0050380]	integral component of membrane [GO:0016021]; plasma membrane [GO:0005886]
δE	sll0219	3'UTR	flavoprotein	Cytoplasmic	Other categories	Other	1.-.-.-	NA	COFACTOR: Name=Fe cation; Xref=ChEBI:CHEBI:24875; ; Note=Binds 2 iron ions per subunit.;	oxidation-reduction process [GO:0055114]	electron carrier activity [GO:0009055]; FMN binding [GO:0010181]; oxidoreductase activity [GO:0016491]	NA
δE	sll0222	3'UTR	putative purple acid phosphatase	Extracellular	Other categories	Other	NA	NA	NA	NA	NA	NA
δE	sll0222	CDS	putative purple acid phosphatase	Extracellular	Other categories	Other	NA	NA	NA	NA	NA	NA
δE	sll0322	CDS	putative hydrogenase expression/formation protein HypF	Cytoplasmic	Other categories	Hydrogenase	2.1.3.-	NA	NA	protein carbamoylation [GO:0046944]; protein maturation [GO:0051604]	carboxyl- or carbamoyltransferase activity [GO:0016743]; double-stranded RNA binding [GO:0003725]; zinc ion binding [GO:0008270]	NA
δE	sll0506	3'UTR	undecaprenyl pyrophosphate synthetase	Cytoplasmic	Other categories	Other	2.5.1.-	NA	COFACTOR: Name=Mg(2+); Xref=ChEBI:CHEBI:18420; Evidence={ECO:0000255|HAMAP-Rule:MF_01139}; ; Note=Binds 2 magnesium ions per subunit. {ECO:0000255|HAMAP-Rule:MF_01139};	NA	magnesium ion binding [GO:0000287]; prenyltransferase activity [GO:0004659]	NA
δE	sll0550	5'UTR	flavoprotein	Cytoplasmic	Other categories	Other	1.-.-.-	NA	COFACTOR: Name=Fe cation; Xref=ChEBI:CHEBI:24875; ; Note=Binds 2 iron ions per monomer.;; COFACTOR: Name=FAD; Xref=ChEBI:CHEBI:57692; ; COFACTOR: Name=FMN; Xref=ChEBI:CHEBI:58210;	oxidation-reduction process [GO:0055114]	FMN binding [GO:0010181]; metal ion binding [GO:0046872]; oxidoreductase activity [GO:0016491]	NA
δE	sll0654	5'UTR	alkaline phosphatase	Unknown	Other categories	Other	NA	NA	NA	nucleotide catabolic process [GO:0009166]	hydrolase activity [GO:0016787]	NA
δE	sll0654	CDS	alkaline phosphatase	Unknown	Other categories	Other	NA	NA	NA	nucleotide catabolic process [GO:0009166]	hydrolase activity [GO:0016787]	NA
δE	sll0686	CDS	probable cytochrome c-type biogenesis protein	CytoplasmicMembrane	Other categories	Other	NA	NA	NA	cytochrome complex assembly [GO:0017004]; oxidation-reduction process [GO:0055114]	NA	integral component of membrane [GO:0016021]
δE	sll0708	3'UTR	dimethyladenosine transferase	Cytoplasmic	Other categories	rRNA maturation	2.1.1.182	CATALYTIC ACTIVITY: 4 S-adenosyl-L-methionine + adenine(1518)/adenine(1519) in 16S rRNA = 4 S-adenosyl-L-homocysteine + N(6)-dimethyladenine(1518)/N(6)-dimethyladenine(1519) in 16S rRNA. {ECO:0000255|HAMAP-Rule:MF_00607}.	NA	GO:0000154 rRNA modification GO:0006364 rRNA processing	16S rRNA (adenine(1518)-N(6)/adenine(1519)-N(6))-dimethyltransferase activity [GO:0052908]; RNA binding [GO:0003723]; rRNA (adenine-N6,N6-)-dimethyltransferase activity [GO:0000179]	cytoplasm [GO:0005737]
δE	sll0708	5'UTR	dimethyladenosine transferase	Cytoplasmic	Other categories	rRNA maturation	2.1.1.182	CATALYTIC ACTIVITY: 4 S-adenosyl-L-methionine + adenine(1518)/adenine(1519) in 16S rRNA = 4 S-adenosyl-L-homocysteine + N(6)-dimethyladenine(1518)/N(6)-dimethyladenine(1519) in 16S rRNA. {ECO:0000255|HAMAP-Rule:MF_00607}.	NA	GO:0000154 rRNA modification GO:0006364 rRNA processing	16S rRNA (adenine(1518)-N(6)/adenine(1519)-N(6))-dimethyltransferase activity [GO:0052908]; RNA binding [GO:0003723]; rRNA (adenine-N6,N6-)-dimethyltransferase activity [GO:0000179]	cytoplasm [GO:0005737]
δE	sll0708	CDS	dimethyladenosine transferase	Cytoplasmic	Other categories	rRNA maturation	2.1.1.182	CATALYTIC ACTIVITY: 4 S-adenosyl-L-methionine + adenine(1518)/adenine(1519) in 16S rRNA = 4 S-adenosyl-L-homocysteine + N(6)-dimethyladenine(1518)/N(6)-dimethyladenine(1519) in 16S rRNA. {ECO:0000255|HAMAP-Rule:MF_00607}.	NA	GO:0000154 rRNA modification GO:0006364 rRNA processing	16S rRNA (adenine(1518)-N(6)/adenine(1519)-N(6))-dimethyltransferase activity [GO:0052908]; RNA binding [GO:0003723]; rRNA (adenine-N6,N6-)-dimethyltransferase activity [GO:0000179]	cytoplasm [GO:0005737]
δE	sll0711	3'UTR	isopentenyl monophosphate kinase	Cytoplasmic	Other categories	Other	2.7.1.148	CATALYTIC ACTIVITY: ATP + 4-(cytidine 5'-diphospho)-2-C-methyl-D-erythritol = ADP + 2-phospho-4-(cytidine 5'-diphospho)-2-C-methyl-D-erythritol. {ECO:0000255|HAMAP-Rule:MF_00061}.	NA	isopentenyl diphosphate biosynthetic process, methylerythritol 4-phosphate pathway [GO:0019288]; terpenoid biosynthetic process [GO:0016114]	4-(cytidine 5'-diphospho)-2-C-methyl-D-erythritol kinase activity [GO:0050515]; ATP binding [GO:0005524]	NA
δE	sll0711	CDS	isopentenyl monophosphate kinase	Cytoplasmic	Other categories	Other	2.7.1.148	CATALYTIC ACTIVITY: ATP + 4-(cytidine 5'-diphospho)-2-C-methyl-D-erythritol = ADP + 2-phospho-4-(cytidine 5'-diphospho)-2-C-methyl-D-erythritol. {ECO:0000255|HAMAP-Rule:MF_00061}.	NA	isopentenyl diphosphate biosynthetic process, methylerythritol 4-phosphate pathway [GO:0019288]; terpenoid biosynthetic process [GO:0016114]	4-(cytidine 5'-diphospho)-2-C-methyl-D-erythritol kinase activity [GO:0050515]; ATP binding [GO:0005524]	NA
δJ	sll0777	CDS	putative carboxypeptidase	Cytoplasmic	Other categories	Other	NA	NA	NA	NA	peptidase activity [GO:0008233]	integral component of membrane [GO:0016021]
δE	sll0829	3'UTR	probable methyltransferase	Cytoplasmic	Other categories	Other	2.1.1.-	NA	NA	methylation [GO:0032259]	S-adenosylmethionine-dependent methyltransferase activity [GO:0008757]	NA
δE	sll0829	CDS	probable methyltransferase	Cytoplasmic	Other categories	Other	2.1.1.-	NA	NA	methylation [GO:0032259]	S-adenosylmethionine-dependent methyltransferase activity [GO:0008757]	NA
δE	sll0986	CDS	putative transposase	Unknown	Other categories	Transposon-related functions	NA	NA	NA	GO:0006313 transposition, DNA-mediated	GO:0003677 DNA binding GO:0004803 transposase activity	NA
δE	sll1033	5'UTR	probable protein phosphatase	Cytoplasmic	Other categories	Other	NA	NA	NA	NA	protein serine/threonine phosphatase activity [GO:0004722]	NA
δE	sll1129	5'UTR	2-hydroxy-6-oxohepta-2,4-dienoate hydrolase	Unknown	Other categories	Other	NA	NA	NA	NA	NA	NA
δE	sll1154	3'UTR	putative antibiotic efflux protein	CytoplasmicMembrane	Other categories	Drug and analog sensitivity	NA	NA	NA	NA	NA	NA
δE	sll1154	5'UTR	putative antibiotic efflux protein	CytoplasmicMembrane	Other categories	Drug and analog sensitivity	NA	NA	NA	NA	NA	NA
δE	sll1154	CDS	putative antibiotic efflux protein	CytoplasmicMembrane	Other categories	Drug and analog sensitivity	NA	NA	NA	NA	NA	NA
δE	sll1253	CDS	similar to polyA polymerase	Unknown	Other categories	Other	NA	NA	NA	NA	NA	NA
δE	sll1297	CDS	probable dioxygenase, Rieske iron-sulfur component	Cytoplasmic	Other categories	Other	NA	NA	NA	NA	NA	NA
δE	sll1300	3'UTR	putative methyltransferase	Cytoplasmic	Other categories	Other	2.1.1.33	CATALYTIC ACTIVITY: S-adenosyl-L-methionine + guanine(46) in tRNA = S-adenosyl-L-homocysteine + N(7)-methylguanine(46) in tRNA. {ECO:0000255|HAMAP-Rule:MF_01057}.	NA	RNA (guanine-N7)-methylation [GO:0036265]	tRNA (guanine-N7-)-methyltransferase activity [GO:0008176]	tRNA methyltransferase complex [GO:0043527]
δE/δJ	sll1308	CDS	probable oxidoreductase	Cytoplasmic	Other categories	Other	NA	NA	NA	NA	oxidoreductase activity [GO:0016491]	NA
δJ	sll1338	3'UTR	probable oxidoreductase	Cytoplasmic	Other categories	Other	NA	NA	NA	NA	oxidoreductase activity [GO:0016491]	NA
δE	sll1407	CDS	probable methyltransferase	Cytoplasmic	Other categories	Other	NA	NA	NA	methylation [GO:0032259]	S-adenosylmethionine-dependent methyltransferase activity [GO:0008757]	NA
δE	sll1432	5'UTR	putative hydrogenase expression/formation protein HypB	Cytoplasmic	Other categories	Hydrogenase	NA	NA	NA	protein complex assembly [GO:0006461]; protein maturation [GO:0051604]	GTPase activity [GO:0003924]; nickel cation binding [GO:0016151]	NA
δE	sll1459	5'UTR	stationary-phase survival protein SurE homolog	Unknown	Other categories	Other	3.1.3.5	CATALYTIC ACTIVITY: A 5'-ribonucleotide + H(2)O = a ribonucleoside + phosphate.	COFACTOR: Name=a divalent metal cation; Xref=ChEBI:CHEBI:60240; Evidence={ECO:0000250}; ; Note=Binds 1 divalent metal cation per subunit. {ECO:0000250};	NA	5'-nucleotidase activity [GO:0008253]; metal ion binding [GO:0046872]; nucleotide binding [GO:0000166]	cytoplasm [GO:0005737]
δE	sll1462	3'UTR	putative hydrogenase expression/formation protein HypE	Cytoplasmic	Other categories	Hydrogenase	NA	NA	NA	NA	NA	NA
δE	sll1462	CDS	putative hydrogenase expression/formation protein HypE	Cytoplasmic	Other categories	Hydrogenase	NA	NA	NA	NA	NA	NA
δE	sll1466	3'UTR	probable glycosyltransferase	Cytoplasmic	Other categories	Other	NA	NA	NA	NA	NA	NA
δE	sll1556	5'UTR	isopentenyl-dephosphate delta-isomerase	Cytoplasmic	Other categories	Other	5.3.3.2	CATALYTIC ACTIVITY: Isopentenyl diphosphate = dimethylallyl diphosphate. {ECO:0000255|HAMAP-Rule:MF_00354}.	COFACTOR: Name=FMN; Xref=ChEBI:CHEBI:58210; Evidence={ECO:0000255|HAMAP-Rule:MF_00354}; ; COFACTOR: Name=NADPH; Xref=ChEBI:CHEBI:57783; Evidence={ECO:0000255|HAMAP-Rule:MF_00354}; ; COFACTOR: Name=Mg(2+); Xref=ChEBI:CHEBI:18420; Evidence={ECO:0000255|HAMAP-Rule:MF_00354};	isoprenoid biosynthetic process [GO:0008299]	FMN binding [GO:0010181]; isopentenyl-diphosphate delta-isomerase activity [GO:0004452]; magnesium ion binding [GO:0000287]; NADPH binding [GO:0070402]; oxidoreductase activity [GO:0016491]	cytoplasm [GO:0005737]
δE	sll1647	3'UTR	probable phosphinothricin N-acetyltransferase	Unknown	Other categories	Other	NA	NA	NA	N-terminal protein amino acid acetylation [GO:0006474]	peptide alpha-N-acetyltransferase activity [GO:0004596]	protein acetyltransferase complex [GO:0031248]
δE	sll1647	5'UTR	probable phosphinothricin N-acetyltransferase	Unknown	Other categories	Other	NA	NA	NA	N-terminal protein amino acid acetylation [GO:0006474]	peptide alpha-N-acetyltransferase activity [GO:0004596]	protein acetyltransferase complex [GO:0031248]
δE	sll1647	CDS	probable phosphinothricin N-acetyltransferase	Unknown	Other categories	Other	NA	NA	NA	N-terminal protein amino acid acetylation [GO:0006474]	peptide alpha-N-acetyltransferase activity [GO:0004596]	protein acetyltransferase complex [GO:0031248]
δE	sll1710	CDS	putative transposase	Cytoplasmic	Other categories	Transposon-related functions	NA	NA	NA	GO:0006313 transposition, DNA-mediated	GO:0003677 DNA binding GO:0004803 transposase activity	NA
δE	sll1716	CDS	putative transposase	Unknown	Other categories	Transposon-related functions	NA	NA	NA	GO:0006313 transposition, DNA-mediated	GO:0003677 DNA binding GO:0004803 transposase activity	NA
δE	sll1785	CDS	probable oxidoreductase	Cytoplasmic	Other categories	Other	NA	NA	NA	NA	oxidoreductase activity [GO:0016491]	NA
δE	sll1863	3'UTR	putative transposase [ISY523o(partial copy): 2225804 - 2226597]	Unknown	Other categories	Transposon-related functions	NA	NA	NA	GO:0006313 transposition, DNA-mediated	GO:0003677 DNA binding GO:0004803 transposase activity	NA
δE	sll1902	5'UTR	acetyltransferase	Cytoplasmic	Other categories	Other	NA	NA	NA	NA	NA	NA
δE	sll1910	5'UTR	protein conferring resistance to acetazolamide Zam	Cytoplasmic	Other categories	NA	NA	NA	NA	NA	GO:0003723 RNA binding GO:0004518 nuclease activity GO:0003676 nucleic acid binding GO:0004540 ribonuclease activity	NA
δE	sll1911	CDS	protein conferring resistance to acetazolamide Zam	Cytoplasmic	Other categories	Drug and analog sensitivity	NA	NA	NA	RNA catabolic process [GO:0006401]; RNA phosphodiester bond hydrolysis, exonucleolytic [GO:0090503]; rRNA processing [GO:0006364]	3'-5'-exoribonuclease activity [GO:0000175]; nucleic acid binding [GO:0003676]	NA
δE	sll1971	3'UTR	probable hexosyltransferase	Cytoplasmic	Other categories	Other	NA	NA	NA	NA	transferase activity, transferring glycosyl groups [GO:0016757]	NA
δE	sll1971	5'UTR	probable hexosyltransferase	Cytoplasmic	Other categories	Other	NA	NA	NA	NA	transferase activity, transferring glycosyl groups [GO:0016757]	NA
δE	sll1971	CDS	probable hexosyltransferase	Cytoplasmic	Other categories	Other	NA	NA	NA	NA	transferase activity, transferring glycosyl groups [GO:0016757]	NA
δE	sll1982	CDS	putative transposase	Cytoplasmic	Other categories	Transposon-related functions	NA	NA	NA	GO:0006313 transposition, DNA-mediated	GO:0003677 DNA binding GO:0004803 transposase activity	NA
δE	sll1985	CDS	putative transposase	Unknown	Other categories	Transposon-related functions	NA	NA	NA	GO:0006313 transposition, DNA-mediated	GO:0003677 DNA binding GO:0004803 transposase activity	NA
δE	sll5014	CDS	similar to maturase	Cytoplasmic	Other categories	Transposon-related functions	NA	NA	NA	NA	endonuclease activity [GO:0004519]	NA
δE	sll5036	5'UTR	sulfide-quinone reductase	Unknown	Other categories	Other	NA	NA	NA	NA	oxidoreductase activity [GO:0016491]	NA
δE	sll5036	CDS	sulfide-quinone reductase	Unknown	Other categories	Other	NA	NA	NA	NA	oxidoreductase activity [GO:0016491]	NA
δE	sll5041	5'UTR	putative transposase	Cytoplasmic	Other categories	Transposon-related functions	NA	NA	NA	GO:0006313 transposition, DNA-mediated	GO:0003677 DNA binding GO:0004803 transposase activity	NA
δE	sll5041	CDS	putative transposase	Cytoplasmic	Other categories	Transposon-related functions	NA	NA	NA	GO:0006313 transposition, DNA-mediated	GO:0003677 DNA binding GO:0004803 transposase activity	NA
δE	sll5042	3'UTR	probable sulfotransferase	Unknown	Other categories	Other	NA	NA	NA	NA	sulfotransferase activity [GO:0008146]	NA
δE	sll5042	5'UTR	probable sulfotransferase	Unknown	Other categories	Other	NA	NA	NA	NA	sulfotransferase activity [GO:0008146]	NA
δE	sll5042	CDS	probable sulfotransferase	Unknown	Other categories	Other	NA	NA	NA	NA	sulfotransferase activity [GO:0008146]	NA
δE	sll5043	3'UTR	probable glycosyltransferase	CytoplasmicMembrane	Other categories	NA	NA	NA	NA	NA	NA	NA
δE	sll5043	CDS	probable glycosyltransferase	CytoplasmicMembrane	Other categories	NA	NA	NA	NA	NA	NA	NA
δE	sll5048	CDS	probable glycosyltransferase	Cytoplasmic	Other categories	Other	NA	NA	NA	NA	NA	NA
δE	sll5050	CDS	probable glycosyltransferase	Unknown	Other categories	Other	NA	NA	NA	NA	NA	integral component of membrane [GO:0016021]
δE	sll5066	CDS	probable plasmid partitioning protein, ParA family	Cytoplasmic	Other categories	Other	NA	NA	NA	NA	NA	NA
δE	sll5084	CDS	probable plasmid partitioning protein, ParB	Unknown	Other categories	NA	NA	NA	NA	NA	GO:0016788 hydrolase activity, acting on ester bonds GO:0003676 nucleic acid binding	NA
δE	sll5094	CDS	plasmid stabilization protein	Unknown	Other categories	Other	3.1.-.-	NA	NA	NA	metal ion binding [GO:0046872]; ribonuclease activity [GO:0004540]	NA
δJ	sll6059	5'UTR	putative integrase/recombinase	Unknown	Other categories	Transposon-related functions	NA	NA	NA	DNA integration [GO:0015074]; DNA recombination [GO:0006310]	DNA binding [GO:0003677]	NA
δJ	sll6059	CDS	putative integrase/recombinase	Unknown	Other categories	Transposon-related functions	NA	NA	NA	DNA integration [GO:0015074]; DNA recombination [GO:0006310]	DNA binding [GO:0003677]	NA
δE	slr0078	CDS	putative 6-pyruvoyl tetrahydrobiopterin synthase	Cytoplasmic	Other categories	Other	4.1.2.50	CATALYTIC ACTIVITY: 7,8-dihydroneopterin 3'-triphosphate + H(2)O = 6-carboxy-5,6,7,8-tetrahydropterin + acetaldehyde + triphosphate.	COFACTOR: Name=Zn(2+); Xref=ChEBI:CHEBI:29105; Evidence={ECO:0000250}; ; Note=Binds 1 zinc ion per subunit. {ECO:0000250};	queuosine biosynthetic process [GO:0008616]	lyase activity [GO:0016829]; metal ion binding [GO:0046872]	NA
δE	slr0095	3'UTR	O-methyltransferase	Cytoplasmic	Other categories	Other	NA	NA	NA	NA	metal ion binding [GO:0046872]; O-methyltransferase activity [GO:0008171]	NA
δE	slr0099	CDS	putative transposase	Cytoplasmic	Other categories	Transposon-related functions	NA	NA	NA	GO:0006313 transposition, DNA-mediated	GO:0003677 DNA binding GO:0004803 transposase activity	NA
δE	slr0116	3'UTR	phycocyanobilin:ferredoxin oxidoreductase	Cytoplasmic	Other categories	Other	1.3.7.5	CATALYTIC ACTIVITY: (3Z)-phycocyanobilin + 4 oxidized ferredoxin = biliverdin IX-alpha + 4 reduced ferredoxin.	NA	phytochromobilin biosynthetic process [GO:0010024]	cobalt ion binding [GO:0050897]; phycocyanobilin:ferredoxin oxidoreductase activity [GO:0050620]	NA
δE	slr0116	CDS	phycocyanobilin:ferredoxin oxidoreductase	Cytoplasmic	Other categories	Other	1.3.7.5	CATALYTIC ACTIVITY: (3Z)-phycocyanobilin + 4 oxidized ferredoxin = biliverdin IX-alpha + 4 reduced ferredoxin.	NA	phytochromobilin biosynthetic process [GO:0010024]	cobalt ion binding [GO:0050897]; phycocyanobilin:ferredoxin oxidoreductase activity [GO:0050620]	NA
δE	slr0231	CDS	probable DNA-3-methyladenine glycosylase	Unknown	Other categories	Other	NA	NA	NA	base-excision repair [GO:0006284]	DNA binding [GO:0003677]; DNA N-glycosylase activity [GO:0019104]	NA
δE	slr0460	CDS	putative transposase	Cytoplasmic	Other categories	Transposon-related functions	NA	NA	NA	GO:0006313 transposition, DNA-mediated	GO:0003677 DNA binding GO:0004803 transposase activity	NA
δE	slr0460	3'UTR	putative transposase	Cytoplasmic	Other categories	Transposon-related functions	NA	NA	NA	GO:0006313 transposition, DNA-mediated	GO:0003677 DNA binding GO:0004803 transposase activity	NA
δE	slr0511	CDS	putative transposase [ISY523g: 2921593 - 2922457]	Cytoplasmic	Other categories	Transposon-related functions	NA	NA	NA	GO:0006313 transposition, DNA-mediated	GO:0003677 DNA binding GO:0004803 transposase activity	NA
δE	slr0545	5'UTR	Auxin-induced protein, oxido-reductase activity	Cytoplasmic	Other categories	Other	NA	NA	NA	NA	oxidoreductase activity [GO:0016491]	NA
δE	slr0604	3'UTR	GTP-binding protein	CytoplasmicMembrane	Other categories	Other	3.6.5.n1	CATALYTIC ACTIVITY: GTP + H(2)O = GDP + phosphate. {ECO:0000255|HAMAP-Rule:MF_00071}.	NA	translation [GO:0006412]	GTPase activity [GO:0003924]; GTP binding [GO:0005525]	intracellular [GO:0005622]; plasma membrane [GO:0005886]
δE	slr0746	CDS	glucosylglycerolphosphate phosphatase	Cytoplasmic	Other categories	heteroside glucosylglycerol synthesis	3.1.3.69	CATALYTIC ACTIVITY: 2-O-(alpha-D-glucosyl)-sn-glycerol-3-phosphate + H(2)O = 2-O-(alpha-D-glucopyranosyl)glycerol + phosphate. {ECO:0000269|PubMed:9045835}.	NA	NA	acid phosphatase activity [GO:0003993]; glucosylglycerol 3-phosphatase activity [GO:0050530]	NA
δE	slr0756	CDS	circadian clock protein KaiA homolog	Cytoplasmic	Other categories	Other	NA	NA	NA	circadian rhythm [GO:0007623]; protein phosphorylation [GO:0006468]	NA	NA
δE	slr0945	CDS	arsenical resistance protein ArsH homolog	Cytoplasmic	Other categories	Drug and analog sensitivity	1.6.5.2	CATALYTIC ACTIVITY: NAD(P)H + a quinone = NAD(P)(+) + a hydroquinone. {ECO:0000269|PubMed:22304305}.	COFACTOR: Name=FMN; Xref=ChEBI:CHEBI:58210; Evidence={ECO:0000269|PubMed:22304305};	oxidation-reduction process [GO:0055114]; protein homotetramerization [GO:0051289]; response to metal ion [GO:0010038]	ferric-chelate reductase activity [GO:0000293]; FMN binding [GO:0010181]; NAD(P)H dehydrogenase (quinone) activity [GO:0003955]; NADPH dehydrogenase (quinone) activity [GO:0008753]	NA
δE	slr0951	CDS	4-diphosphocytidyl-2C-methyl-D-erythritol synthase	Unknown	Other categories	Other	2.7.7.60	CATALYTIC ACTIVITY: CTP + 2-C-methyl-D-erythritol 4-phosphate = diphosphate + 4-(cytidine 5'-diphospho)-2-C-methyl-D-erythritol. {ECO:0000255|HAMAP-Rule:MF_00108}.	NA	isopentenyl diphosphate biosynthetic process, methylerythritol 4-phosphate pathway [GO:0019288]; terpenoid biosynthetic process [GO:0016114]	2-C-methyl-D-erythritol 4-phosphate cytidylyltransferase activity [GO:0050518]	NA
δE	slr0951	5'UTR	4-diphosphocytidyl-2C-methyl-D-erythritol synthase	Unknown	Other categories	Other	2.7.7.60	CATALYTIC ACTIVITY: CTP + 2-C-methyl-D-erythritol 4-phosphate = diphosphate + 4-(cytidine 5'-diphospho)-2-C-methyl-D-erythritol. {ECO:0000255|HAMAP-Rule:MF_00108}.	NA	isopentenyl diphosphate biosynthetic process, methylerythritol 4-phosphate pathway [GO:0019288]; terpenoid biosynthetic process [GO:0016114]	2-C-methyl-D-erythritol 4-phosphate cytidylyltransferase activity [GO:0050518]	NA
δE	slr1019	CDS	phenazine biosynthetic protein PhzF homolog	Cytoplasmic	Other categories	Other	5.1.-.-	NA	NA	biosynthetic process [GO:0009058]	isomerase activity [GO:0016853]	NA
δE	slr1019	3'UTR	phenazine biosynthetic protein PhzF homolog	Cytoplasmic	Other categories	Other	5.1.-.-	NA	NA	biosynthetic process [GO:0009058]	isomerase activity [GO:0016853]	NA
δE	slr1115	CDS	probable methyltransferase	Unknown	Other categories	Other	NA	NA	NA	methylation [GO:0032259]	S-adenosylmethionine-dependent methyltransferase activity [GO:0008757]	NA
δE	slr1128	CDS	subunit of high light-inducible carotenoid-binding protein complex in the thylakoid membranes	Unknown	Other categories	Adaptations and atypical conditions	NA	NA	NA	NA	NA	integral component of membrane [GO:0016021]
δE	slr1128	3'UTR	subunit of high light-inducible carotenoid-binding protein complex in the thylakoid membranes	Unknown	Other categories	Adaptations and atypical conditions	NA	NA	NA	NA	NA	integral component of membrane [GO:0016021]
δE	slr1128	5'UTR	subunit of high light-inducible carotenoid-binding protein complex in the thylakoid membranes	Unknown	Other categories	Adaptations and atypical conditions	NA	NA	NA	NA	NA	integral component of membrane [GO:0016021]
δE	slr1140	CDS	DegT/DnrJ/EryC1/StrS family protein	Cytoplasmic	Other categories	Other	NA	NA	NA	NA	catalytic activity [GO:0003824]	NA
δE	slr1140	3'UTR	DegT/DnrJ/EryC1/StrS family protein	Cytoplasmic	Other categories	Other	NA	NA	NA	NA	catalytic activity [GO:0003824]	NA
δE	slr1208	5'UTR	probable oxidoreductase	Cytoplasmic	Other categories	Other	NA	NA	NA	NA	oxidoreductase activity [GO:0016491]	NA
δE	slr1420	CDS	probable sugar kinase	Unknown	Other categories	Other	NA	NA	NA	carbohydrate metabolic process [GO:0005975]; phosphorylation [GO:0016310]	phosphotransferase activity, alcohol group as acceptor [GO:0016773]	cytoplasm [GO:0005737]
δE	slr1498	CDS	putative hydrogenase expression/formation protein HypD	Cytoplasmic	Other categories	Hydrogenase	NA	NA	NA	NA	GO:0046872 metal ion binding	NA
δE	slr1501	CDS	probable acetyltransferase	Cytoplasmic	Other categories	Other	NA	NA	NA	N-terminal protein amino acid acetylation [GO:0006474]	peptide alpha-N-acetyltransferase activity [GO:0004596]	protein acetyltransferase complex [GO:0031248]
δE	slr1501	5'UTR	probable acetyltransferase	Cytoplasmic	Other categories	Other	NA	NA	NA	N-terminal protein amino acid acetylation [GO:0006474]	peptide alpha-N-acetyltransferase activity [GO:0004596]	protein acetyltransferase complex [GO:0031248]
δE	slr1520	CDS	oxidoreductase, aldo/keto reductase family	Cytoplasmic	Other categories	Other	NA	NA	NA	NA	iron-sulfur cluster binding [GO:0051536]; oxidoreductase activity [GO:0016491]	NA
δE	slr1521	CDS	GTP-binding protein	Cytoplasmic	Other categories	Other	NA	NA	NA	NA	NA	NA
δE	slr1523	CDS	putative transposase	Cytoplasmic	Other categories	Transposon-related functions	NA	NA	NA	GO:0006313 transposition, DNA-mediated	GO:0003677 DNA binding GO:0004803 transposase activity	NA
δE	slr1639	CDS	SsrA-binding protein	Cytoplasmic	Other categories	Other	NA	NA	NA	trans-translation [GO:0070929]	RNA binding [GO:0003723]	cytoplasm [GO:0005737]
δE	slr1639	3'UTR	SsrA-binding protein	Cytoplasmic	Other categories	Other	NA	NA	NA	trans-translation [GO:0070929]	RNA binding [GO:0003723]	cytoplasm [GO:0005737]
δE	slr1710	3'UTR	penicillin-binding protein	CytoplasmicMembrane	Other categories	Drug and analog sensitivity	NA	NA	NA	NA	NA	NA
δE	slr1764	CDS	similar to tellurium resistance protein TerE	Cytoplasmic	Other categories	Drug and analog sensitivity	NA	NA	NA	response to stress [GO:0006950]	NA	NA
δE	slr1772	3'UTR	probable hydrolase, periplasmic protein	Unknown	Other categories	Other	NA	NA	NA	NA	hydrolase activity, acting on carbon-nitrogen (but not peptide) bonds, in linear amides [GO:0016811]	integral component of membrane [GO:0016021]; outer membrane-bounded periplasmic space [GO:0030288]
δE	slr1888	CDS	4-hydroxybutyrate coenzyme A transferase.	Cytoplasmic	Other categories	Other	NA	NA	NA	acetyl-CoA metabolic process [GO:0006084]	CoA-transferase activity [GO:0008410]; N-acetyltransferase activity [GO:0008080]	cytosol [GO:0005829]
δE	slr1916	3'UTR	probable esterase	Unknown	Other categories	Other	NA	NA	NA	NA	hydrolase activity [GO:0016787]	NA
δE	slr1942	5'UTR	circadian clock protein KaiC homolog	Cytoplasmic	Other categories	Other	NA	NA	NA	DNA recombinase assembly [GO:0000730]; mitotic recombination [GO:0006312]; regulation of circadian rhythm [GO:0042752]; regulation of transcription, DNA-templated [GO:0006355]; response to ionizing radiation [GO:0010212]; strand invasion [GO:0042148]	ATP binding [GO:0005524]; DNA-dependent ATPase activity [GO:0008094]; double-stranded DNA binding [GO:0003690]; four-way junction DNA binding [GO:0000400]; magnesium ion binding [GO:0000287]; protein serine/threonine kinase activity [GO:0004674]; recombinase activity [GO:0000150]; single-stranded DNA binding [GO:0003697]	NA
δE	slr1974	CDS	GTP binding protein	Cytoplasmic	Other categories	Other	NA	NA	NA	ribosome biogenesis [GO:0042254]	GTP binding [GO:0005525]	NA
δE	slr1974	3'UTR	GTP binding protein	Cytoplasmic	Other categories	Other	NA	NA	NA	ribosome biogenesis [GO:0042254]	GTP binding [GO:0005525]	NA
δE	slr1974	5'UTR	GTP binding protein	Cytoplasmic	Other categories	Other	NA	NA	NA	ribosome biogenesis [GO:0042254]	GTP binding [GO:0005525]	NA
δE	slr2001	5'UTR	cyanophycinase	Unknown	Other categories	Adaptations and atypical conditions	3.4.15.6	CATALYTIC ACTIVITY: (L-Asp(4-L-Arg))(n) + H(2)O = (L-Asp(4-L-Arg))(n-1) + L-Asp(4-L-Arg). {ECO:0000269|PubMed:10429200, ECO:0000269|PubMed:19591842}.	NA	cellular macromolecule metabolic process [GO:0044260]	protein homodimerization activity [GO:0042803]; serine-type peptidase activity [GO:0008236]	NA
δE	slr2036	CDS	putative transposase	Cytoplasmic	Other categories	Transposon-related functions	NA	NA	NA	GO:0006313 transposition, DNA-mediated	GO:0003677 DNA binding GO:0004803 transposase activity	NA
δE	slr2036	3'UTR	putative transposase	Cytoplasmic	Other categories	Transposon-related functions	NA	NA	NA	GO:0006313 transposition, DNA-mediated	GO:0003677 DNA binding GO:0004803 transposase activity	NA
δE	slr2036	5'UTR	putative transposase	Cytoplasmic	Other categories	Transposon-related functions	NA	NA	NA	GO:0006313 transposition, DNA-mediated	GO:0003677 DNA binding GO:0004803 transposase activity	NA
δE	slr2126	3'UTR	probable glycosyltransferase	Unknown	Other categories	Other	NA	NA	NA	NA	transferase activity, transferring glycosyl groups [GO:0016757]	NA
δE	slr5010	CDS	integrase/recombinase	Unknown	Other categories	Transposon-related functions	NA	NA	NA	DNA integration [GO:0015074]; DNA recombination [GO:0006310]	DNA binding [GO:0003677]	NA
δE	slr5010	3'UTR	integrase/recombinase	Unknown	Other categories	Transposon-related functions	NA	NA	NA	DNA integration [GO:0015074]; DNA recombination [GO:0006310]	DNA binding [GO:0003677]	NA
δE	slr5010	5'UTR	integrase/recombinase	Unknown	Other categories	Transposon-related functions	NA	NA	NA	DNA integration [GO:0015074]; DNA recombination [GO:0006310]	DNA binding [GO:0003677]	NA
δE	slr5022	CDS	probable aminotransferase	Cytoplasmic	Other categories	Other	NA	NA	NA	NA	catalytic activity [GO:0003824]	NA
δE	slr5029	CDS	putative transposase [ISY391d(partial copy): 31333 - 32206]	Cytoplasmic	Other categories	Transposon-related functions	NA	NA	NA	GO:0006313 transposition, DNA-mediated	GO:0003677 DNA binding GO:0004803 transposase activity	NA
δE	slr5029	3'UTR	putative transposase [ISY391d(partial copy): 31333 - 32206]	Cytoplasmic	Other categories	Transposon-related functions	NA	NA	NA	GO:0006313 transposition, DNA-mediated	GO:0003677 DNA binding GO:0004803 transposase activity	NA
δE	slr5029	5'UTR	putative transposase [ISY391d(partial copy): 31333 - 32206]	Cytoplasmic	Other categories	Transposon-related functions	NA	NA	NA	GO:0006313 transposition, DNA-mediated	GO:0003677 DNA binding GO:0004803 transposase activity	NA
δE	slr5040	CDS	putative transposase	CytoplasmicMembrane	Other categories	Transposon-related functions	NA	NA	NA	GO:0006313 transposition, DNA-mediated	GO:0003677 DNA binding GO:0004803 transposase activity	NA
δE	slr5054	CDS	probable glycosyltransferase	Unknown	Other categories	Other	NA	NA	NA	NA	transferase activity, transferring glycosyl groups [GO:0016757]	integral component of membrane [GO:0016021]
δE	slr5054	3'UTR	probable glycosyltransferase	Unknown	Other categories	Other	NA	NA	NA	NA	transferase activity, transferring glycosyl groups [GO:0016757]	integral component of membrane [GO:0016021]
δE	slr5055	CDS	similar to UDP-N-acetyl-D-mannosaminuronic acid transferase	Cytoplasmic	Other categories	Other	NA	NA	NA	biosynthetic process [GO:0009058]	transferase activity, transferring glycosyl groups [GO:0016757]	NA
δE	slr5055	5'UTR	similar to UDP-N-acetyl-D-mannosaminuronic acid transferase	Cytoplasmic	Other categories	Other	NA	NA	NA	biosynthetic process [GO:0009058]	transferase activity, transferring glycosyl groups [GO:0016757]	NA
δJ	slr5088	CDS	probable short-chain dehydrogenase	Cytoplasmic	Other categories	Other	NA	NA	NA	NA	oxidoreductase activity [GO:0016491]	NA
δE	slr5093	CDS	probable flavin-containing amine oxidase	Unknown	Other categories	Other	NA	NA	NA	NA	oxidoreductase activity [GO:0016491]	NA
δE	ssr1175	5'UTR	putative transposase	Cytoplasmic	Other categories	Transposon-related functions	NA	NA	NA	GO:0006313 transposition, DNA-mediated	GO:0003677 DNA binding GO:0004803 transposase activity	NA
δE	sll0223	3'UTR	NADH dehydrogenase subunit 2	CytoplasmicMembrane	Photosynthesis and respiration	NADH dehydrogenase	1.6.5.-	CATALYTIC ACTIVITY: NAD(P)H + plastoquinone = NAD(P)(+) + plastoquinol. {ECO:0000255|HAMAP-Rule:MF_00445}.	NA	ATP synthesis coupled electron transport [GO:0042773]; photosynthesis, light reaction [GO:0019684]; transport [GO:0006810]	NADH dehydrogenase (ubiquinone) activity [GO:0008137]; quinone binding [GO:0048038]	integral component of membrane [GO:0016021]; thylakoid membrane [GO:0042651]
δE	sll0247	5'UTR	iron-stress chlorophyll-binding protein, homologous to psbC (CP43)	CytoplasmicMembrane	Photosynthesis and respiration	Photosystem II	NA	NA	NA	GO:0019684 photosynthesis, light reaction GO:0009767 photosynthetic electron transport chain	GO:0016168 chlorophyll binding	GO:0016020 membrane GO:0009521 photosystem
δE	sll0247	CDS	iron-stress chlorophyll-binding protein, homologous to psbC (CP43)	CytoplasmicMembrane	Photosynthesis and respiration	Photosystem II	NA	NA	NA	GO:0019684 photosynthesis, light reaction GO:0009767 photosynthetic electron transport chain	GO:0016168 chlorophyll binding	GO:0016020 membrane GO:0009521 photosystem
δE	sll0248	CDS	flavodoxin	Cytoplasmic	Photosynthesis and respiration	Soluble electron carriers	NA	NA	COFACTOR: Name=FMN; Xref=ChEBI:CHEBI:58210;	oxidation-reduction process [GO:0055114]	electron carrier activity [GO:0009055]; FMN binding [GO:0010181]	NA
δE	sll0427	3'UTR	photosystem II manganese-stabilizing polypeptide	Unknown	Photosynthesis and respiration	Photosystem II	NA	NA	NA	photosynthesis [GO:0015979]; photosystem II stabilization [GO:0042549]	calcium ion binding [GO:0005509]	extrinsic component of membrane [GO:0019898]; integral component of membrane [GO:0016021]; photosystem II oxygen evolving complex [GO:0009654]; plasma membrane-derived thylakoid photosystem II [GO:0030096]
δE	sll0427	CDS	photosystem II manganese-stabilizing polypeptide	Unknown	Photosynthesis and respiration	Photosystem II	NA	NA	NA	photosynthesis [GO:0015979]; photosystem II stabilization [GO:0042549]	calcium ion binding [GO:0005509]	extrinsic component of membrane [GO:0019898]; integral component of membrane [GO:0016021]; photosystem II oxygen evolving complex [GO:0009654]; plasma membrane-derived thylakoid photosystem II [GO:0030096]
δE	sll0634	5'UTR	photosystem I biogenesis protein BtpA	Unknown	Photosynthesis and respiration	Photosystem I	NA	NA	NA	NA	catalytic activity [GO:0003824]	NA
δE	sll0634	CDS	photosystem I biogenesis protein BtpA	Unknown	Photosynthesis and respiration	Photosystem I	NA	NA	NA	NA	catalytic activity [GO:0003824]	NA
δJ	sll0741	5'UTR	pyruvate flavodoxin oxidoreductase	Unknown	Photosynthesis and respiration	Soluble electron carriers	1.2.7.-	CATALYTIC ACTIVITY: Pyruvate + CoA + oxidized flavodoxin = acetyl-CoA + CO(2) + reduced flavodoxin.	COFACTOR: Name=[4Fe-4S] cluster; Xref=ChEBI:CHEBI:49883; Evidence={ECO:0000250|UniProtKB:P94692}; ; Note=Binds 3 [4Fe-4S] clusters per subunit. {ECO:0000250|UniProtKB:P94692};	electron transport chain [GO:0022900]; nitrogen fixation [GO:0009399]; response to oxidative stress [GO:0006979]	4 iron, 4 sulfur cluster binding [GO:0051539]; iron ion binding [GO:0005506]; oxidoreductase activity [GO:0016491]; oxidoreductase activity, acting on the aldehyde or oxo group of donors [GO:0016903]; thiamine pyrophosphate binding [GO:0030976]	NA
δE	sll0819	5'UTR	photosystem I reaction center subunit III precursor (PSI-F), plastocyanin (cyt c553) docking protein	CytoplasmicMembrane	Photosynthesis and respiration	Photosystem I	NA	NA	NA	photosynthesis [GO:0015979]	NA	photosystem I reaction center [GO:0009538]; plasma membrane-derived photosystem I [GO:0030094]
δE	sll0819	CDS	photosystem I reaction center subunit III precursor (PSI-F), plastocyanin (cyt c553) docking protein	CytoplasmicMembrane	Photosynthesis and respiration	Photosystem I	NA	NA	NA	photosynthesis [GO:0015979]	NA	photosystem I reaction center [GO:0009538]; plasma membrane-derived photosystem I [GO:0030094]
δE	sll1051	5'UTR	phycocyanin alpha-subunit phycocyanobilin lyase	Unknown	Photosynthesis and respiration	Phycobilisome	NA	NA	NA	NA	lyase activity [GO:0016829]	phycobilisome [GO:0030089]
δE	sll1051	CDS	phycocyanin alpha-subunit phycocyanobilin lyase	Unknown	Photosynthesis and respiration	Phycobilisome	NA	NA	NA	NA	lyase activity [GO:0016829]	phycobilisome [GO:0030089]
δE	sll1245	3'UTR	cytochrome cM	Unknown	Photosynthesis and respiration	Soluble electron carriers	NA	NA	NA	oxidation-reduction process [GO:0055114]; photosynthesis [GO:0015979]	electron carrier activity [GO:0009055]; heme binding [GO:0020037]; metal ion binding [GO:0046872]	NA
δE	sll1398	5'UTR	photosystem II reaction center 13 kDa protein	CytoplasmicMembrane	Photosynthesis and respiration	Photosystem II	NA	NA	NA	photosynthesis [GO:0015979]	NA	photosystem II oxygen evolving complex [GO:0009654]; plasma membrane-derived thylakoid photosystem II [GO:0030096]
δE	sll1638	3'UTR	photosystem II PsbQ protein, photosystem assembly	Unknown	Photosynthesis and respiration	Photosystem II	NA	NA	NA	photosynthesis [GO:0015979]	calcium ion binding [GO:0005509]	extrinsic component of membrane [GO:0019898]; photosystem II oxygen evolving complex [GO:0009654]; plasma membrane-derived thylakoid photosystem II [GO:0030096]
δE	sll1638	5'UTR	photosystem II PsbQ protein, photosystem assembly	Unknown	Photosynthesis and respiration	Photosystem II	NA	NA	NA	photosynthesis [GO:0015979]	calcium ion binding [GO:0005509]	extrinsic component of membrane [GO:0019898]; photosystem II oxygen evolving complex [GO:0009654]; plasma membrane-derived thylakoid photosystem II [GO:0030096]
δE	sll1638	CDS	photosystem II PsbQ protein, photosystem assembly	Unknown	Photosynthesis and respiration	Photosystem II	NA	NA	NA	photosynthesis [GO:0015979]	calcium ion binding [GO:0005509]	extrinsic component of membrane [GO:0019898]; photosystem II oxygen evolving complex [GO:0009654]; plasma membrane-derived thylakoid photosystem II [GO:0030096]
δJ	sll1796	CDS	cytochrome c553	Periplasmic	Photosynthesis and respiration	Soluble electron carriers	NA	NA	NA	oxidation-reduction process [GO:0055114]; photosynthesis [GO:0015979]	electron carrier activity [GO:0009055]; heme binding [GO:0020037]; iron ion binding [GO:0005506]	NA
δE	slr0251	3'UTR	NADH dehydrogenase subunit 2	CytoplasmicMembrane	Photosynthesis and respiration	NADH dehydrogenase	1.6.5.-	CATALYTIC ACTIVITY: NAD(P)H + plastoquinone = NAD(P)(+) + plastoquinol. {ECO:0000255|HAMAP-Rule:MF_00445}.	NA	ATP synthesis coupled electron transport [GO:0042773]; photosynthesis, light reaction [GO:0019684]; transport [GO:0006810]	NADH dehydrogenase (ubiquinone) activity [GO:0008137]; quinone binding [GO:0048038]	integral component of membrane [GO:0016021]; thylakoid membrane [GO:0042651]
δE	slr0331	3'UTR	phycocyanin beta subunit	Unknown	Photosynthesis and respiration	Phycobilisome	NA	NA	NA	oxidation-reduction process [GO:0055114]; photosynthesis [GO:0015979]; protein-chromophore linkage [GO:0018298]	NA	phycobilisome [GO:0030089]
δE	slr0331	CDS	NADH dehydrogenase subunit 4 (involved in photosystem-1 cyclic electron flow)	CytoplasmicMembrane	Photosynthesis and respiration	NADH dehydrogenase	1.6.5.-	CATALYTIC ACTIVITY: NAD(P)H + plastoquinone = NAD(P)(+) + plastoquinol.	NA	ATP synthesis coupled electron transport [GO:0042773]	NADH dehydrogenase (ubiquinone) activity [GO:0008137]; quinone binding [GO:0048038]	NA
δE	slr0335	3'UTR	phycobilisome core-membrane linker polypeptide	CytoplasmicMembrane	Photosynthesis and respiration	Phycobilisome	4.-.-.-	NA	NA	oxidation-reduction process [GO:0055114]; photosynthesis [GO:0015979]; protein-chromophore linkage [GO:0018298]	lyase activity [GO:0016829]	phycobilisome [GO:0030089]
δE	slr0335	CDS	phycobilisome core-membrane linker polypeptide	CytoplasmicMembrane	Photosynthesis and respiration	Phycobilisome	4.-.-.-	NA	NA	oxidation-reduction process [GO:0055114]; photosynthesis [GO:0015979]; protein-chromophore linkage [GO:0018298]	lyase activity [GO:0016829]	phycobilisome [GO:0030089]
δE	slr0436	3'UTR	carbon dioxide concentrating mechanism protein CcmO	Cytoplasmic	Photosynthesis and respiration	CO2 fixation	NA	NA	NA	NA	NA	NA
δE	slr0436	CDS	carbon dioxide concentrating mechanism protein CcmO	Cytoplasmic	Photosynthesis and respiration	CO2 fixation	NA	NA	NA	NA	NA	NA
δE	slr0737	5'UTR	phycobilisome rod linker polypeptide	CytoplasmicMembrane	Photosynthesis and respiration	Phycobilisome	NA	NA	NA	photosynthesis [GO:0015979]	NA	phycobilisome [GO:0030089]
δE	slr0783	5'UTR	triosephosphate isomerase	Cytoplasmic	Photosynthesis and respiration	CO2 fixation	5.3.1.1	CATALYTIC ACTIVITY: D-glyceraldehyde 3-phosphate = glycerone phosphate. {ECO:0000255|HAMAP-Rule:MF_00147}.	NA	gluconeogenesis [GO:0006094]; glyceraldehyde-3-phosphate biosynthetic process [GO:0046166]; glycerol catabolic process [GO:0019563]; glycolytic process [GO:0006096]; pentose-phosphate shunt [GO:0006098]	triose-phosphate isomerase activity [GO:0004807]	cytosol [GO:0005829]
δE	slr0888	5'UTR	phycobilisome rod linker polypeptide	Unknown	Photosynthesis and respiration	Phycobilisome	NA	NA	NA	photosynthesis [GO:0015979]	NA	phycobilisome [GO:0030089]
δE	slr0924	5'UTR	subunit of protein import complex to thylakoid membrane, photosystem assembly	CytoplasmicMembrane	Photosynthesis and respiration	Photosystem II	NA	NA	NA	NA	NA	outer membrane-bounded periplasmic space [GO:0030288]
δE	slr1034	CDS	NADH dehydrogenase subunit 4 (involved in photosystem-1 cyclic electron flow)	CytoplasmicMembrane	Photosynthesis and respiration	NADH dehydrogenase	1.6.5.-	CATALYTIC ACTIVITY: NAD(P)H + plastoquinone = NAD(P)(+) + plastoquinol.	NA	ATP synthesis coupled electron transport [GO:0042773]	NADH dehydrogenase (ubiquinone) activity [GO:0008137]; quinone binding [GO:0048038]	integral component of membrane [GO:0016021]; thylakoid membrane [GO:0042651]
δE	slr1161	CDS	photosystem I subunit II	CytoplasmicMembrane	Photosynthesis and respiration	Photosystem I	NA	NA	NA	photosynthesis [GO:0015979]	NA	photosystem I reaction center [GO:0009538]; plasma membrane-derived photosystem I [GO:0030094]
δE	slr1173	CDS	ATP synthase beta subunit	Cytoplasmic	Photosynthesis and respiration	ATP synthase	3.6.3.14	CATALYTIC ACTIVITY: ATP + H(2)O + H(+)(In) = ADP + phosphate + H(+)(Out). {ECO:0000255|HAMAP-Rule:MF_01347}.	NA	ATP hydrolysis coupled proton transport [GO:0015991]; plasma membrane ATP synthesis coupled proton transport [GO:0042777]	ATP binding [GO:0005524]; proton-transporting ATP synthase activity, rotational mechanism [GO:0046933]	plasma membrane proton-transporting ATP synthase complex [GO:0045260]; proton-transporting ATP synthase complex, catalytic core F(1) [GO:0045261]; thylakoid membrane [GO:0042651]
δE	slr1185	CDS	cytochrome b6-f complex alternative iron-sulfur subunit (Rieske iron sulfur protein)	Unknown	Photosynthesis and respiration	Cytochrome b6/f complex	1.10.9.1	CATALYTIC ACTIVITY: Plastoquinol + 2 oxidized plastocyanin + 2 H(+)(Side 1) = plastoquinone + 2 reduced plastocyanin + 4 H(+)(Side 2). {ECO:0000255|HAMAP-Rule:MF_01335}.	COFACTOR: Name=[2Fe-2S] cluster; Xref=ChEBI:CHEBI:49601; Evidence={ECO:0000255|HAMAP-Rule:MF_01335}; ; Note=Binds 1 [2Fe-2S] cluster per subunit. {ECO:0000255|HAMAP-Rule:MF_01335};	photosynthesis [GO:0015979]	2 iron, 2 sulfur cluster binding [GO:0051537]; electron transporter, transferring electrons within cytochrome b6/f complex of photosystem II activity [GO:0045158]; metal ion binding [GO:0046872]; plastoquinol--plastocyanin reductase activity [GO:0009496]	integral component of membrane [GO:0016021]; thylakoid membrane [GO:0042651]
δE	slr1214	3'UTR	photosystem I reaction center subunit X	CytoplasmicMembrane	Photosynthesis and respiration	Photosystem I	NA	NA	NA	photosynthesis [GO:0015979]	NA	integral component of membrane [GO:0016021]; photosystem I [GO:0009522]; thylakoid membrane [GO:0042651]
δE	slr1291	CDS	NADH dehydrogenase subunit 4	CytoplasmicMembrane	Photosynthesis and respiration	NADH dehydrogenase	1.6.5.-	CATALYTIC ACTIVITY: NAD(P)H + plastoquinone = NAD(P)(+) + plastoquinol.	NA	ATP synthesis coupled electron transport [GO:0042773]	NADH dehydrogenase (ubiquinone) activity [GO:0008137]; quinone binding [GO:0048038]	integral component of membrane [GO:0016021]; thylakoid membrane [GO:0042651]
δE	slr1291	5'UTR	NADH dehydrogenase subunit 4	CytoplasmicMembrane	Photosynthesis and respiration	NADH dehydrogenase	1.6.5.-	CATALYTIC ACTIVITY: NAD(P)H + plastoquinone = NAD(P)(+) + plastoquinol.	NA	ATP synthesis coupled electron transport [GO:0042773]	NADH dehydrogenase (ubiquinone) activity [GO:0008137]; quinone binding [GO:0048038]	integral component of membrane [GO:0016021]; thylakoid membrane [GO:0042651]
δJ	slr1379	CDS	quinol oxidase subunit I	CytoplasmicMembrane	Photosynthesis and respiration	Respiratory terminal oxidases	NA	NA	NA	NA	NA	NA
δE	slr1379	5'UTR	quinol oxidase subunit I	CytoplasmicMembrane	Photosynthesis and respiration	Respiratory terminal oxidases	NA	NA	NA	NA	NA	NA
δE/δJ	slr1380	CDS	quinol oxidase subunit II	CytoplasmicMembrane	Photosynthesis and respiration	Respiratory terminal oxidases	NA	NA	NA	NA	NA	NA
δE/δJ	slr1380	3'UTR	quinol oxidase subunit II	CytoplasmicMembrane	Photosynthesis and respiration	Respiratory terminal oxidases	NA	NA	NA	NA	NA	NA
δE	slr1878	CDS	phycocyanin alpha-subunit phycocyanobilin lyase	Unknown	Photosynthesis and respiration	Phycobilisome	4.-.-.-	NA	NA	NA	lyase activity [GO:0016829]	phycobilisome [GO:0030089]
δE	slr1878	3'UTR	phycocyanin alpha-subunit phycocyanobilin lyase	Unknown	Photosynthesis and respiration	Phycobilisome	4.-.-.-	NA	NA	NA	lyase activity [GO:0016829]	phycobilisome [GO:0030089]
δE	sml0004	5'UTR	cytochrome b6-f complex subunit VIII	Unknown	Photosynthesis and respiration	NA	NA	NA	NA	GO:0017004 cytochrome complex assembly	GO:0045158 electron transporter, transferring electrons within cytochrome b6/f complex of photosystem II activity	GO:0009512 cytochrome b6f complex
δE	sml0008	3'UTR	photosystem I subunit IX	Unknown	Photosynthesis and respiration	Photosystem I	NA	NA	NA	photosynthesis [GO:0015979]	NA	integral component of membrane [GO:0016021]; photosystem I [GO:0009522]; thylakoid membrane [GO:0042651]
δE	sml0008	CDS	photosystem I subunit IX	Unknown	Photosynthesis and respiration	Photosystem I	NA	NA	NA	photosynthesis [GO:0015979]	NA	integral component of membrane [GO:0016021]; photosystem I [GO:0009522]; thylakoid membrane [GO:0042651]
δE	ssl0020	3'UTR	ferredoxin I, essential for growth	Unknown	Photosynthesis and respiration	Soluble electron carriers	NA	NA	COFACTOR: Name=[2Fe-2S] cluster; Xref=ChEBI:CHEBI:49601; ; Note=Binds 1 [2Fe-2S] cluster.;	electron transport chain [GO:0022900]	2 iron, 2 sulfur cluster binding [GO:0051537]; electron carrier activity [GO:0009055]; metal ion binding [GO:0046872]	NA
δE	ssl0020	5'UTR	ferredoxin I, essential for growth	Unknown	Photosynthesis and respiration	Soluble electron carriers	NA	NA	COFACTOR: Name=[2Fe-2S] cluster; Xref=ChEBI:CHEBI:49601; ; Note=Binds 1 [2Fe-2S] cluster.;	electron transport chain [GO:0022900]	2 iron, 2 sulfur cluster binding [GO:0051537]; electron carrier activity [GO:0009055]; metal ion binding [GO:0046872]	NA
δE	ssl0020	CDS	ferredoxin I, essential for growth	Unknown	Photosynthesis and respiration	Soluble electron carriers	NA	NA	COFACTOR: Name=[2Fe-2S] cluster; Xref=ChEBI:CHEBI:49601; ; Note=Binds 1 [2Fe-2S] cluster.;	electron transport chain [GO:0022900]	2 iron, 2 sulfur cluster binding [GO:0051537]; electron carrier activity [GO:0009055]; metal ion binding [GO:0046872]	NA
δJ	ssl0452	5'UTR	phycobilisome degradation protein NblA	Unknown	Photosynthesis and respiration	Phycobilisome	NA	NA	NA	NA	NA	NA
δJ	ssl0452	CDS	phycobilisome degradation protein NblA	Unknown	Photosynthesis and respiration	Phycobilisome	NA	NA	NA	NA	NA	NA
δJ	ssl0453	3'UTR	phycobilisome degradation protein NblA	Unknown	Photosynthesis and respiration	Phycobilisome	NA	NA	NA	NA	NA	NA
δJ	ssl0453	CDS	phycobilisome degradation protein NblA	Unknown	Photosynthesis and respiration	Phycobilisome	NA	NA	NA	NA	NA	NA
δE	ssl2542	CDS	high light-inducible polypeptide HliA, CAB/ELIP/HLIP superfamily	Unknown	Photosynthesis and respiration	Adaptations and atypical conditions	NA	NA	NA	NA	NA	integral component of membrane [GO:0016021]
δE	ssl2542	5'UTR	high light-inducible polypeptide HliA, CAB/ELIP/HLIP superfamily	Unknown	Photosynthesis and respiration	Adaptations and atypical conditions	NA	NA	NA	NA	NA	integral component of membrane [GO:0016021]
δE	ssr2595	CDS	high light-inducible polypeptide HliB, CAB/ELIP/HLIP superfamily	Unknown	Photosynthesis and respiration	Adaptations and atypical conditions	NA	NA	NA	NA	NA	integral component of membrane [GO:0016021]
δE	ssr2595	5'UTR	high light-inducible polypeptide HliB, CAB/ELIP/HLIP superfamily	Unknown	Photosynthesis and respiration	Adaptations and atypical conditions	NA	NA	NA	NA	NA	integral component of membrane [GO:0016021]
δE	ssr3184	CDS	4Fe-4S type iron-sulfur protein	Unknown	Photosynthesis and respiration	Soluble electron carriers	NA	NA	NA	NA	electron carrier activity [GO:0009055]	NA
δE	ssr3184	5'UTR	4Fe-4S type iron-sulfur protein	Unknown	Photosynthesis and respiration	Soluble electron carriers	NA	NA	NA	NA	electron carrier activity [GO:0009055]	NA
δE	sll0509	5'UTR	similar to P-1,P-4-tetraphosphate phosphorylase II	Cytoplasmic	Purines, pyrimidines, nucleosides, and nucleotides	Purine ribonucleotide biosynthesis	NA	NA	NA	nucleotide metabolic process [GO:0009117]	ATP adenylyltransferase activity [GO:0003877]; ATP binding [GO:0005524]	NA
δE	sll0509	CDS	similar to P-1,P-4-tetraphosphate phosphorylase II	Cytoplasmic	Purines, pyrimidines, nucleosides, and nucleotides	Purine ribonucleotide biosynthesis	NA	NA	NA	nucleotide metabolic process [GO:0009117]	ATP adenylyltransferase activity [GO:0003877]; ATP binding [GO:0005524]	NA
δE	sll1035	CDS	uracil phosphoribosyltransferase	Cytoplasmic	Purines, pyrimidines, nucleosides, and nucleotides	Interconversions and salvage of nucleosides and nucleotides	2.4.2.9	CATALYTIC ACTIVITY: UMP + diphosphate = uracil + 5-phospho-alpha-D-ribose 1-diphosphate. {ECO:0000255|HAMAP-Rule:MF_01218}.	COFACTOR: Name=Mg(2+); Xref=ChEBI:CHEBI:18420; Evidence={ECO:0000255|HAMAP-Rule:MF_01218}; ; Note=Binds 1 Mg(2+) ion per subunit. The magnesium is bound as Mg-PRPP. {ECO:0000255|HAMAP-Rule:MF_01218};	pyrimidine nucleobase metabolic process [GO:0006206]; pyrimidine nucleoside salvage [GO:0043097]; UMP salvage [GO:0044206]; uracil salvage [GO:0006223]	GTP binding [GO:0005525]; magnesium ion binding [GO:0000287]; uracil phosphoribosyltransferase activity [GO:0004845]; uridine kinase activity [GO:0004849]	cytosol [GO:0005829]
δE	sll1054	3'UTR	GBA2 non-lysosomal glucosylceramidase	Cytoplasmic	Purines, pyrimidines, nucleosides, and nucleotides	Purine ribonucleotide biosynthesis	NA	NA	NA	NA	hydrolase activity [GO:0016787]	NA
δE	sll1054	CDS	GBA2 non-lysosomal glucosylceramidase	Cytoplasmic	Purines, pyrimidines, nucleosides, and nucleotides	Purine ribonucleotide biosynthesis	NA	NA	NA	NA	hydrolase activity [GO:0016787]	NA
δE	sll1056	CDS	phosphoribosylformyl glycinamidine synthetase II	Cytoplasmic	Purines, pyrimidines, nucleosides, and nucleotides	Purine ribonucleotide biosynthesis	6.3.5.3	CATALYTIC ACTIVITY: ATP + N(2)-formyl-N(1)-(5-phospho-D-ribosyl)glycinamide + L-glutamine + H(2)O = ADP + phosphate + 2-(formamido)-N(1)-(5-phospho-D-ribosyl)acetamidine + L-glutamate. {ECO:0000255|HAMAP-Rule:MF_00420}.	NA	de novo' IMP biosynthetic process [GO:0006189]; glutamine metabolic process [GO:0006541]; purine nucleotide biosynthetic process [GO:0006164]; ribonucleoside monophosphate biosynthetic process [GO:0009156]	ATP binding [GO:0005524]; magnesium ion binding [GO:0000287]; phosphoribosylformylglycinamidine synthase activity [GO:0004642]	cytoplasm [GO:0005737]
δE	sll1059	CDS	adenylate kinase	Cytoplasmic	Purines, pyrimidines, nucleosides, and nucleotides	Purine ribonucleotide biosynthesis	2.7.4.3	CATALYTIC ACTIVITY: ATP + AMP = 2 ADP. {ECO:0000255|HAMAP-Rule:MF_00235}.	NA	AMP salvage [GO:0044209]	adenylate kinase activity [GO:0004017]; ATP binding [GO:0005524]	cytoplasm [GO:0005737]
δE	sll1430	5'UTR	adenine phosphoribosyltransferase	Cytoplasmic	Purines, pyrimidines, nucleosides, and nucleotides	Interconversions and salvage of nucleosides and nucleotides	2.4.2.7	CATALYTIC ACTIVITY: AMP + diphosphate = adenine + 5-phospho-alpha-D-ribose 1-diphosphate. {ECO:0000255|HAMAP-Rule:MF_00004}.	NA	adenine salvage [GO:0006168]; AMP salvage [GO:0044209]	adenine phosphoribosyltransferase activity [GO:0003999]	NA
δE	sll1430	3'UTR	adenine phosphoribosyltransferase	Cytoplasmic	Purines, pyrimidines, nucleosides, and nucleotides	Interconversions and salvage of nucleosides and nucleotides	2.4.2.7	CATALYTIC ACTIVITY: AMP + diphosphate = adenine + 5-phospho-alpha-D-ribose 1-diphosphate. {ECO:0000255|HAMAP-Rule:MF_00004}.	NA	adenine salvage [GO:0006168]; AMP salvage [GO:0044209]	adenine phosphoribosyltransferase activity [GO:0003999]	NA
δE	sll1430	CDS	adenine phosphoribosyltransferase	Cytoplasmic	Purines, pyrimidines, nucleosides, and nucleotides	Interconversions and salvage of nucleosides and nucleotides	2.4.2.7	CATALYTIC ACTIVITY: AMP + diphosphate = adenine + 5-phospho-alpha-D-ribose 1-diphosphate. {ECO:0000255|HAMAP-Rule:MF_00004}.	NA	adenine salvage [GO:0006168]; AMP salvage [GO:0044209]	adenine phosphoribosyltransferase activity [GO:0003999]	cytoplasm [GO:0005737]
δE/δJ	sll1430	CDS	adenine phosphoribosyltransferase	Cytoplasmic	Purines, pyrimidines, nucleosides, and nucleotides	Interconversions and salvage of nucleosides and nucleotides	2.4.2.7	CATALYTIC ACTIVITY: AMP + diphosphate = adenine + 5-phospho-alpha-D-ribose 1-diphosphate. {ECO:0000255|HAMAP-Rule:MF_00004}.	NA	adenine salvage [GO:0006168]; AMP salvage [GO:0044209]	adenine phosphoribosyltransferase activity [GO:0003999]	NA
δE	sll1631	CDS	putative cytidine and deoxycytidylate deaminase	Cytoplasmic	Purines, pyrimidines, nucleosides, and nucleotides	Pyrimidine ribonucleotide biosynthesis	3.5.4.33	CATALYTIC ACTIVITY: Adenine(34) in tRNA + H(2)O = hypoxanthine(34) in tRNA + NH(3). {ECO:0000256|HAMAP-Rule:MF_00972}.	COFACTOR: Name=Zn(2+); Xref=ChEBI:CHEBI:29105; Evidence={ECO:0000256|HAMAP-Rule:MF_00972}; ; Note=Binds 1 zinc ion per subunit. {ECO:0000256|HAMAP-Rule:MF_00972};	tRNA wobble adenosine to inosine editing [GO:0002100]	tRNA-specific adenosine-34 deaminase activity [GO:0052717]; zinc ion binding [GO:0008270]	NA
δE	slr0402	CDS	MTHFS 5-formyltetrahydrofolate cyclo-ligase	Cytoplasmic	Purines, pyrimidines, nucleosides, and nucleotides	Purine ribonucleotide biosynthesis	3.6.1.19	CATALYTIC ACTIVITY: A nucleoside triphosphate + H(2)O = a nucleotide + diphosphate. {ECO:0000255|HAMAP-Rule:MF_01405}.	COFACTOR: Name=Mg(2+); Xref=ChEBI:CHEBI:18420; Evidence={ECO:0000255|HAMAP-Rule:MF_01405}; Name=Mn(2+); Xref=ChEBI:CHEBI:29035; Evidence={ECO:0000255|HAMAP-Rule:MF_01405}; ; Note=Binds 1 divalent metal cation per subunit; can use either Mg(2+) or Mn(2+). {ECO:0000255|HAMAP-Rule:MF_01405};	nucleoside triphosphate catabolic process [GO:0009143]; purine nucleotide metabolic process [GO:0006163]	metal ion binding [GO:0046872]; nucleoside-triphosphatase activity [GO:0017111]; nucleoside-triphosphate diphosphatase activity [GO:0047429]; nucleotide binding [GO:0000166]	NA
δE	slr0519	CDS	VTE1 tocopherol cyclase	Unknown	Purines, pyrimidines, nucleosides, and nucleotides	Purine ribonucleotide biosynthesis	6.3.5.3	CATALYTIC ACTIVITY: ATP + N(2)-formyl-N(1)-(5-phospho-D-ribosyl)glycinamide + L-glutamine + H(2)O = ADP + phosphate + 2-(formamido)-N(1)-(5-phospho-D-ribosyl)acetamidine + L-glutamate. {ECO:0000255|HAMAP-Rule:MF_01926}.	NA	NA	GO:0016879 ligase activity, forming carbon-nitrogen bonds	NA
δE	slr0520	CDS	phosphoribosyl formylglycinamidine synthase	Cytoplasmic	Purines, pyrimidines, nucleosides, and nucleotides	Purine ribonucleotide biosynthesis	6.3.5.3; 3.5.1.2	CATALYTIC ACTIVITY: ATP + N(2)-formyl-N(1)-(5-phospho-D-ribosyl)glycinamide + L-glutamine + H(2)O = ADP + phosphate + 2-(formamido)-N(1)-(5-phospho-D-ribosyl)acetamidine + L-glutamate. {ECO:0000255|HAMAP-Rule:MF_00421}.; CATALYTIC ACTIVITY: L-glutamine + H(2)O = L-glutamate + NH(3). {ECO:0000255|HAMAP-Rule:MF_00421}.	NA	de novo' IMP biosynthetic process [GO:0006189]; glutamine metabolic process [GO:0006541]; purine nucleotide biosynthetic process [GO:0006164]; ribonucleoside monophosphate biosynthetic process [GO:0009156]	ATP binding [GO:0005524]; glutaminase activity [GO:0004359]; phosphoribosylformylglycinamidine synthase activity [GO:0004642]	NA
δE	slr0838	5'UTR	phosphoribosyl formylglycinamidine cyclo-ligase	Cytoplasmic	Purines, pyrimidines, nucleosides, and nucleotides	Purine ribonucleotide biosynthesis	6.3.3.1	CATALYTIC ACTIVITY: ATP + 2-(formamido)-N(1)-(5-phospho-D-ribosyl)acetamidine = ADP + phosphate + 5-amino-1-(5-phospho-D-ribosyl)imidazole. {ECO:0000255|HAMAP-Rule:MF_00741}.	NA	de novo' IMP biosynthetic process [GO:0006189]	ATP binding [GO:0005524]; phosphoribosylformylglycinamidine cyclo-ligase activity [GO:0004641]	cytoplasm [GO:0005737]
δE	slr1123	CDS	guanylate kinase	Cytoplasmic	Purines, pyrimidines, nucleosides, and nucleotides	Purine ribonucleotide biosynthesis	2.7.4.8	CATALYTIC ACTIVITY: ATP + GMP = ADP + GDP.	NA	NA	ATP binding [GO:0005524]; guanylate kinase activity [GO:0004385]	cytoplasm [GO:0005737]
δJ	slr1164	3'UTR	ribonucleotide reductase subunit alpha	Cytoplasmic	Purines, pyrimidines, nucleosides, and nucleotides	Purine ribonucleotide biosynthesis	1.17.4.1	CATALYTIC ACTIVITY: 2'-deoxyribonucleoside diphosphate + thioredoxin disulfide + H(2)O = ribonucleoside diphosphate + thioredoxin.	NA	deoxyribonucleotide biosynthetic process [GO:0009263]; DNA replication [GO:0006260]	ATP binding [GO:0005524]; ribonucleoside-diphosphate reductase activity, thioredoxin disulfide as acceptor [GO:0004748]	ribonucleoside-diphosphate reductase complex [GO:0005971]
δJ	slr1164	5'UTR	ribonucleotide reductase subunit alpha	Cytoplasmic	Purines, pyrimidines, nucleosides, and nucleotides	Purine ribonucleotide biosynthesis	1.17.4.1	CATALYTIC ACTIVITY: 2'-deoxyribonucleoside diphosphate + thioredoxin disulfide + H(2)O = ribonucleoside diphosphate + thioredoxin.	NA	deoxyribonucleotide biosynthetic process [GO:0009263]; DNA replication [GO:0006260]	ATP binding [GO:0005524]; ribonucleoside-diphosphate reductase activity, thioredoxin disulfide as acceptor [GO:0004748]	ribonucleoside-diphosphate reductase complex [GO:0005971]
δJ	slr1164	CDS	ribonucleotide reductase subunit alpha	Cytoplasmic	Purines, pyrimidines, nucleosides, and nucleotides	Purine ribonucleotide biosynthesis	1.17.4.1	CATALYTIC ACTIVITY: 2'-deoxyribonucleoside diphosphate + thioredoxin disulfide + H(2)O = ribonucleoside diphosphate + thioredoxin.	NA	deoxyribonucleotide biosynthetic process [GO:0009263]; DNA replication [GO:0006260]	ATP binding [GO:0005524]; ribonucleoside-diphosphate reductase activity, thioredoxin disulfide as acceptor [GO:0004748]	ribonucleoside-diphosphate reductase complex [GO:0005971]
δE	slr1237	CDS	cytosine deaminase	Cytoplasmic	Purines, pyrimidines, nucleosides, and nucleotides	Pyrimidine ribonucleotide biosynthesis	NA	NA	NA	NA	NA	NA
δE	slr1237	5'UTR	cytosine deaminase	Cytoplasmic	Purines, pyrimidines, nucleosides, and nucleotides	Pyrimidine ribonucleotide biosynthesis	NA	NA	NA	NA	GO:0016810 hydrolase activity, acting on carbon-nitrogen (but not peptide) bonds	NA
δE	slr1476	5'UTR	aspartate carbamoyltransferase	Cytoplasmic	Purines, pyrimidines, nucleosides, and nucleotides	Pyrimidine ribonucleotide biosynthesis	2.1.3.2	CATALYTIC ACTIVITY: Carbamoyl phosphate + L-aspartate = phosphate + N-carbamoyl-L-aspartate.	NA	de novo' pyrimidine nucleobase biosynthetic process [GO:0006207]; 'de novo' UMP biosynthetic process [GO:0044205]; cellular amino acid metabolic process [GO:0006520]; pyrimidine ribonucleotide biosynthetic process [GO:0009220]	amino acid binding [GO:0016597]; aspartate carbamoyltransferase activity [GO:0004070]	cytoplasm [GO:0005737]
δE	slr6034	CDS	cytidine deaminase	Cytoplasmic	Purines, pyrimidines, nucleosides, and nucleotides	Pyrimidine ribonucleotide biosynthesis	NA	NA	NA	GO:0046087 cytidine metabolic process	GO:0003824 catalytic activity GO:0004126 cytidine deaminase activity GO:0016787 hydrolase activity GO:0008270 zinc ion binding	NA
δE	slr6034	5'UTR	cytidine deaminase	Cytoplasmic	Purines, pyrimidines, nucleosides, and nucleotides	Pyrimidine ribonucleotide biosynthesis	NA	NA	NA	GO:0046087 cytidine metabolic process	GO:0003824 catalytic activity GO:0004126 cytidine deaminase activity GO:0016787 hydrolase activity GO:0008270 zinc ion binding	NA
δE	sll0094	5'UTR	two-component sensor histidine kinase	CytoplasmicMembrane	Regulatory functions	NA	NA	NA	NA	NA	ATP binding [GO:0005524]; phosphorelay sensor kinase activity [GO:0000155]	intracellular [GO:0005622]
δE	sll0474	CDS	two-component hybrid sensor and regulator	CytoplasmicMembrane	Regulatory functions	NA	NA	CATALYTIC ACTIVITY: ATP + protein L-histidine = ADP + protein N-phospho-L-histidine. {ECO:0000256|SAAS:SAAS00146860}.	NA	NA	ATP binding [GO:0005524]; phosphorelay sensor kinase activity [GO:0000155]	integral component of membrane [GO:0016021]; intracellular [GO:0005622]
δE	sll0594	CDS	transcriptional regulator	Cytoplasmic	Regulatory functions	NA	NA	NA	NA	sulfate transport [GO:0008272]; transcription, DNA-templated [GO:0006351]	DNA binding [GO:0003677]; transcription factor activity, sequence-specific DNA binding [GO:0003700]	cytoplasm [GO:0005737]
δE	sll0789	CDS	two-component response regulator OmpR subfamily	Cytoplasmic	Regulatory functions	NA	NA	NA	NA	phosphorelay signal transduction system [GO:0000160]; regulation of transcription, DNA-templated [GO:0006355]; transcription, DNA-templated [GO:0006351]	DNA binding [GO:0003677]	intracellular [GO:0005622]
δE	sll0790	CDS	two-component sensor histidine kinase	CytoplasmicMembrane	Regulatory functions	NA	NA	NA	NA	NA	ATP binding [GO:0005524]; phosphorelay sensor kinase activity [GO:0000155]	integral component of membrane [GO:0016021]; intracellular [GO:0005622]
δE	sll0792	CDS	Zinc-responsive repressor ZiaR	Unknown	Regulatory functions	NA	NA	NA	NA	transcription, DNA-templated [GO:0006351]	DNA binding [GO:0003677]; metal ion binding [GO:0046872]; transcription factor activity, sequence-specific DNA binding [GO:0003700]	intracellular [GO:0005622]
δE	sll0998	CDS	LysR family transcriptional regulator	Cytoplasmic	Regulatory functions	NA	NA	NA	NA	transcription, DNA-templated [GO:0006351]	DNA binding [GO:0003677]; transcription factor activity, sequence-specific DNA binding [GO:0003700]	NA
δE	sll1003	CDS	two-component sensor histidine kinase	CytoplasmicMembrane	Regulatory functions	NA	NA	CATALYTIC ACTIVITY: ATP + protein L-histidine = ADP + protein N-phospho-L-histidine. {ECO:0000256|SAAS:SAAS00146860}.	NA	regulation of transcription, DNA-templated [GO:0006355]	ATP binding [GO:0005524]; phosphorelay sensor kinase activity [GO:0000155]	intracellular [GO:0005622]
δE	sll1005	CDS	MazG protein homolog	Unknown	Regulatory functions	NA	NA	NA	NA	dATP catabolic process [GO:0046061]; dGTP catabolic process [GO:0006203]; dTTP catabolic process [GO:0046076]; dUTP catabolic process [GO:0046081]; TTP catabolic process [GO:0046047]; UTP catabolic process [GO:0046052]	nucleoside-triphosphate diphosphatase activity [GO:0047429]	NA
δE	sll1205	CDS	transcriptional regulator, PchR1	Cytoplasmic	Regulatory functions	NA	NA	NA	NA	GO:0045449 regulation of transcription GO:0006355 regulation of transcription, DNA-dependent	GO:0003677 DNA binding GO:0043565 sequence-specific DNA binding GO:0003700 transcription factor activity	GO:0005622 intracellular
δE	sll1229	CDS	two-component hybrid sensor and regulator	Cytoplasmic	Regulatory functions	NA	NA	NA	NA	NA	phosphorelay sensor kinase activity [GO:0000155]	intracellular [GO:0005622]
δE	sll1286	3'UTR	transcriptional regulator	Unknown	Regulatory functions	NA	NA	NA	NA	regulation of transcription, DNA-templated [GO:0006355]; transcription, DNA-templated [GO:0006351]	DNA binding [GO:0003677]	NA
δE/δJ	sll1286	CDS	transcriptional regulator	Unknown	Regulatory functions	NA	NA	NA	NA	regulation of transcription, DNA-templated [GO:0006355]; transcription, DNA-templated [GO:0006351]	DNA binding [GO:0003677]	NA
δE	sll1329	5'UTR	inositol monophosphate family protein	CytoplasmicMembrane	Regulatory functions	NA	NA	NA	NA	inositol metabolic process [GO:0006020]; inositol phosphate dephosphorylation [GO:0046855]; phosphatidylinositol phosphorylation [GO:0046854]; signal transduction [GO:0007165]	inositol monophosphate 1-phosphatase activity [GO:0008934]; magnesium ion binding [GO:0000287]	cytoplasm [GO:0005737]
δE	sll1330	CDS	two-component system response regulator OmpR subfamily	Cytoplasmic	Regulatory functions	NA	NA	NA	NA	phosphorelay signal transduction system [GO:0000160]; regulation of transcription, DNA-templated [GO:0006355]; transcription, DNA-templated [GO:0006351]	DNA binding [GO:0003677]	intracellular [GO:0005622]
δE	sll1387	3'UTR	serine/threonine protein phosphatase PppA	Cytoplasmic	Regulatory functions	NA	NA	NA	NA	NA	hydrolase activity [GO:0016787]	NA
δE	sll1387	5'UTR	serine/threonine protein phosphatase PppA	Cytoplasmic	Regulatory functions	NA	NA	NA	NA	NA	hydrolase activity [GO:0016787]	NA
δE	sll1387	CDS	serine/threonine protein phosphatase PppA	Cytoplasmic	Regulatory functions	NA	NA	NA	NA	NA	hydrolase activity [GO:0016787]	NA
δE	sll1388	5'UTR	transcriptional regulator, universal stress protein domain	Cytoplasmic	Regulatory functions	NA	NA	NA	NA	response to stress [GO:0006950]	NA	NA
δE	sll1392	5'UTR	transcriptional regulator	Cytoplasmic	Regulatory functions	NA	NA	NA	NA	GO:0045449 regulation of transcription GO:0006355 regulation of transcription, DNA-dependent	GO:0003677 DNA binding GO:0003700 transcription factor activity	NA
δE	sll1392	CDS	transcriptional regulator, PfsR	Cytoplasmic	Regulatory functions	NA	NA	NA	NA	GO:0045449 regulation of transcription GO:0006355 regulation of transcription, DNA-dependent	GO:0003677 DNA binding GO:0003700 transcription factor activity	NA
δE	sll1408	3'UTR	transcriptional regulator	Cytoplasmic	Regulatory functions	NA	NA	NA	NA	GO:0045449 regulation of transcription GO:0006355 regulation of transcription, DNA-dependent	GO:0003677 DNA binding GO:0043565 sequence-specific DNA binding GO:0003700 transcription factor activity	NA
δE	sll1408	CDS	transcriptional regulator, pcrR	Cytoplasmic	Regulatory functions	NA	NA	NA	NA	GO:0045449 regulation of transcription GO:0006355 regulation of transcription, DNA-dependent	GO:0003677 DNA binding GO:0043565 sequence-specific DNA binding GO:0003700 transcription factor activity	NA
δE	sll1423	CDS	global nitrogen regulator NtcA	Cytoplasmic	Regulatory functions	NA	NA	NA	NA	GO:0045449 regulation of transcription GO:0006355 regulation of transcription, DNA-dependent	GO:0003677 DNA binding GO:0003700 transcription factor activity	GO:0005622 intracellular
δE	sll1473	CDS	a part of phytochrome-like sensor histidine kinase gene (disrupted by insertion of IS)	Cytoplasmic	Regulatory functions	NA	NA	NA	NA	protein-chromophore linkage [GO:0018298]	phosphorelay sensor kinase activity [GO:0000155]	intracellular [GO:0005622]
δE	sll1475	3'UTR	A part of phytochrome-like sensor histidine kinase gene (disrupted by insertion of IS)	CytoplasmicMembrane	Regulatory functions	NA	NA	NA	NA	GO:0018106 peptidyl-histidine phosphorylation GO:0016310 phosphorylation GO:0006355 regulation of transcription, DNA-dependent GO:0007165 signal transduction GO:0000160 two-component signal transduction system (phosphorelay)	GO:0005524 ATP binding GO:0004673 protein histidine kinase activity GO:0004871 signal transducer activity GO:0016772 transferase activity, transferring phosphorus-containing groups GO:0000155 two component sensor activity	GO:0016020 membrane
δE	sll1512	3'UTR	uncharacterized HTH-type transcriptional regulator	Cytoplasmic	Regulatory functions	NA	NA	NA	NA	regulation of transcription, DNA-templated [GO:0006355]; transcription, DNA-templated [GO:0006351]	DNA binding [GO:0003677]	NA
δE	sll1512	5'UTR	uncharacterized HTH-type transcriptional regulator	Cytoplasmic	Regulatory functions	NA	NA	NA	NA	regulation of transcription, DNA-templated [GO:0006355]; transcription, DNA-templated [GO:0006351]	DNA binding [GO:0003677]	NA
δE	sll1544	3'UTR	two-component response regulator NarL subfamily	Cytoplasmic	Regulatory functions	NA	NA	NA	NA	GO:0006355 regulation of transcription, DNA-dependent GO:0000160 two-component signal transduction system (phosphorelay)	GO:0003677 DNA binding GO:0043565 sequence-specific DNA binding GO:0003700 transcription factor activity GO:0000156 two-component response regulator activity	NA
δE	sll1544	5'UTR	two-component response regulator NarL subfamily	Cytoplasmic	Regulatory functions	NA	NA	NA	NA	GO:0006355 regulation of transcription, DNA-dependent GO:0000160 two-component signal transduction system (phosphorelay)	GO:0003677 DNA binding GO:0043565 sequence-specific DNA binding GO:0003700 transcription factor activity GO:0000156 two-component response regulator activity	NA
δE	sll1544	CDS	two-component response regulator NarL subfamily	Cytoplasmic	Regulatory functions	NA	NA	NA	NA	GO:0006355 regulation of transcription, DNA-dependent GO:0000160 two-component signal transduction system (phosphorelay)	GO:0003677 DNA binding GO:0043565 sequence-specific DNA binding GO:0003700 transcription factor activity GO:0000156 two-component response regulator activity	NA
δE	sll1574	CDS	a part of spkA: serine/threonine protein kinase, regulates cellular motility ( disrupted by frameshift mutation)	Unknown	Regulatory functions	NA	NA	NA	NA	NA	NA	NA
δE	sll1575	3'UTR	a part of spkA: serine/threonine protein kinase, regulates cellular motility ( disrupted by frameshift mutation)	CytoplasmicMembrane	Regulatory functions	NA	NA	NA	NA	GO:0006468 protein amino acid phosphorylation	GO:0005524 ATP binding GO:0004672 protein kinase activity GO:0004674 protein serine/threonine kinase activity	NA
δE	sll1575	CDS	a part of spkA: serine/threonine protein kinase, regulates cellular motility ( disrupted by frameshift mutation)	CytoplasmicMembrane	Regulatory functions	NA	NA	NA	NA	GO:0006468 protein amino acid phosphorylation	GO:0005524 ATP binding GO:0004672 protein kinase activity GO:0004674 protein serine/threonine kinase activity	NA
δE	sll1590	5'UTR	two-component sensor histidine kinase	CytoplasmicMembrane	Regulatory functions	NA	NA	NA	NA	NA	ATP binding [GO:0005524]; phosphorelay sensor kinase activity [GO:0000155]	integral component of membrane [GO:0016021]; intracellular [GO:0005622]
δE	sll1590	CDS	two-component sensor histidine kinase	CytoplasmicMembrane	Regulatory functions	NA	NA	NA	NA	NA	ATP binding [GO:0005524]; phosphorelay sensor kinase activity [GO:0000155]	integral component of membrane [GO:0016021]; intracellular [GO:0005622]
δE	sll1592	CDS	two-component response regulator NarL subfamily	Cytoplasmic	Regulatory functions	NA	NA	NA	NA	phosphorelay signal transduction system [GO:0000160]; regulation of transcription, DNA-templated [GO:0006355]; transcription, DNA-templated [GO:0006351]	DNA binding [GO:0003677]	NA
δE	sll1594	5'UTR	ndhF3 operon transcriptional regulator, LysR family protein	Cytoplasmic	Regulatory functions	NA	NA	NA	NA	NA	NA	NA
δE	sll1708	CDS	two-component response regulator NarL subfamily	Cytoplasmic	Regulatory functions	NA	NA	NA	NA	phosphorelay signal transduction system [GO:0000160]; regulation of transcription, DNA-templated [GO:0006355]; transcription, DNA-templated [GO:0006351]	GO:0043565 sequence-specific DNA binding GO:0003700 transcription factor activity GO:0000156 two-component response regulator activity	NA
δE	sll1742	CDS	transcription antitermination protein NusG	Cytoplasmic	Regulatory functions	NA	NA	NA	NA	DNA-templated transcription, elongation [GO:0006354]; DNA-templated transcription, termination [GO:0006353]; regulation of DNA-templated transcription, elongation [GO:0032784]; regulation of transcription, DNA-templated [GO:0006355]; transcription antitermination [GO:0031564]	NA	cytosol [GO:0005829]
δE	sll1876	CDS	transcriptional regulator	CytoplasmicMembrane	Regulatory functions	NA	NA	NA	NA	NA	NA	NA
δE	sll1888	3'UTR	two-component sensor histidine kinase	CytoplasmicMembrane	Regulatory functions	NA	NA	NA	NA	NA	phosphorelay sensor kinase activity [GO:0000155]	intracellular [GO:0005622]
δE	sll1924	3'UTR	cAMP receptor protein sycrp1 homolog	Cytoplasmic	Regulatory functions	NA	NA	NA	NA	regulation of transcription, DNA-templated [GO:0006355]; transcription, DNA-templated [GO:0006351]	DNA binding [GO:0003677]	NA
δE	sll1924	5'UTR	cAMP receptor protein sycrp1 homolog	Cytoplasmic	Regulatory functions	NA	NA	NA	NA	regulation of transcription, DNA-templated [GO:0006355]; transcription, DNA-templated [GO:0006351]	DNA binding [GO:0003677]	NA
δE	sll1924	CDS	cAMP receptor protein sycrp1 homolog	Cytoplasmic	Regulatory functions	NA	NA	NA	NA	regulation of transcription, DNA-templated [GO:0006355]; transcription, DNA-templated [GO:0006351]	DNA binding [GO:0003677]	NA
δE	sll1957	5'UTR	transcriptional regulator	Unknown	Regulatory functions	NA	NA	NA	NA	NA	NA	NA
δE	sll1961	3'UTR	transcriptional regulator, involved in photosystem stoichiometry regulation and glucose uptake regulation under mixotrophic growth	Cytoplasmic	Regulatory functions	NA	NA	NA	NA	transcription, DNA-templated [GO:0006351]	DNA binding [GO:0003677]; transcription factor activity, sequence-specific DNA binding [GO:0003700]	NA
δE	sll5059	3'UTR	two-component response regulator	Cytoplasmic	Regulatory functions	NA	NA	NA	NA	phosphorelay signal transduction system [GO:0000160]	NA	NA
δE	sll5059	5'UTR	two-component response regulator	Cytoplasmic	Regulatory functions	NA	NA	NA	NA	phosphorelay signal transduction system [GO:0000160]	NA	NA
δE	sll5059	CDS	two-component response regulator	Cytoplasmic	Regulatory functions	NA	NA	NA	NA	phosphorelay signal transduction system [GO:0000160]	NA	NA
δE	sll5060	CDS	two-component hybrid sensor &amp; regulator	CytoplasmicMembrane	Regulatory functions	NA	NA	NA	NA	GO:0018106 peptidyl-histidine phosphorylation GO:0016310 phosphorylation GO:0006355 regulation of transcription, DNA-dependent GO:0007165 signal transduction GO:0000160 two-component signal transduction system (phosphorelay)	protein transporter activity [GO:0008565]	NA
δE	slr0073	3'UTR	two-component sensor histidine kinase	Cytoplasmic	Regulatory functions	NA	NA	NA	NA	phosphorelay signal transduction system [GO:0000160]	kinase activity [GO:0016301]; signal transducer activity [GO:0004871]	intracellular [GO:0005622]
δE	slr0081	3'UTR	two-component response regulator OmpR subfamily	Cytoplasmic	Regulatory functions	NA	NA	NA	NA	phosphorelay signal transduction system [GO:0000160]; regulation of transcription, DNA-templated [GO:0006355]; transcription, DNA-templated [GO:0006351]	DNA binding [GO:0003677]	intracellular [GO:0005622]
δE	slr0114	5'UTR	putative PP2C-type protein phosphatase	Cytoplasmic	Regulatory functions	NA	NA	NA	NA	NA	catalytic activity [GO:0003824]	integral component of membrane [GO:0016021]
δE	slr0114	CDS	putative PP2C-type protein phosphatase	Cytoplasmic	Regulatory functions	NA	NA	NA	NA	NA	catalytic activity [GO:0003824]	integral component of membrane [GO:0016021]
δE	slr0115	5'UTR	response regulator for energy transfer from phycobilisomes to photosystems	Cytoplasmic	Regulatory functions	NA	NA	NA	NA	phosphorelay signal transduction system [GO:0000160]; regulation of transcription, DNA-templated [GO:0006355]; transcription, DNA-templated [GO:0006351]	DNA binding [GO:0003677]	intracellular [GO:0005622]
δE	slr0115	CDS	response regulator for energy transfer from phycobilisomes to photosystems	Cytoplasmic	Regulatory functions	NA	NA	NA	NA	phosphorelay signal transduction system [GO:0000160]; regulation of transcription, DNA-templated [GO:0006355]; transcription, DNA-templated [GO:0006351]	DNA binding [GO:0003677]	intracellular [GO:0005622]
δE	slr0152	CDS	serine/threonine protein kinase	CytoplasmicMembrane	Regulatory functions	NA	NA	NA	NA	protein phosphorylation [GO:0006468]	ATP binding [GO:0005524]; protein serine/threonine kinase activity [GO:0004674]	NA
δE	slr0210	5'UTR	two-component sensor histidine kinase	CytoplasmicMembrane	Regulatory functions	NA	NA	NA	NA	NA	ATP binding [GO:0005524]; phosphorelay sensor kinase activity [GO:0000155]	intracellular [GO:0005622]
δE	slr0311	CDS	two-component sensor histidine kinase	CytoplasmicMembrane	Regulatory functions	NA	NA	NA	NA	regulation of transcription, DNA-templated [GO:0006355]	phosphorelay sensor kinase activity [GO:0000155]	integral component of membrane [GO:0016021]; intracellular [GO:0005622]
δE	slr0321	CDS	GTP-binding protein ERA homolog	CytoplasmicMembrane	Regulatory functions	NA	NA	NA	NA	ribosomal small subunit biogenesis [GO:0042274]	GTPase activity [GO:0003924]; GTP binding [GO:0005525]; small ribosomal subunit rRNA binding [GO:0070181]	NA
δE	slr0322	5'UTR	two-component hybrid sensor and regulator	Cytoplasmic	Regulatory functions	NA	NA	NA	NA	chemotaxis [GO:0006935]	phosphorelay sensor kinase activity [GO:0000155]	cytoplasm [GO:0005737]
δE/δJ	slr0473	5'UTR	cyanobacterial phytochrome 1, two-component sensor histidine kinase	CytoplasmicMembrane	Regulatory functions	NA	2.7.13.3	CATALYTIC ACTIVITY: ATP + protein L-histidine = ADP + protein N-phospho-L-histidine.	NA	detection of visible light [GO:0009584]; peptidyl-histidine phosphorylation [GO:0018106]; protein autophosphorylation [GO:0046777]; protein-chromophore linkage [GO:0018298]; red, far-red light phototransduction [GO:0009585]; regulation of transcription, DNA-templated [GO:0006355]; response to red or far red light [GO:0009639]	ATP binding [GO:0005524]; identical protein binding [GO:0042802]; phosphorelay sensor kinase activity [GO:0000155]; protein histidine kinase activity [GO:0004673]; red or far-red light photoreceptor activity [GO:0009883]	intracellular [GO:0005622]
δE/δJ	slr0473	CDS	cyanobacterial phytochrome 1, two-component sensor histidine kinase	CytoplasmicMembrane	Regulatory functions	NA	2.7.13.3	CATALYTIC ACTIVITY: ATP + protein L-histidine = ADP + protein N-phospho-L-histidine.	NA	detection of visible light [GO:0009584]; peptidyl-histidine phosphorylation [GO:0018106]; protein autophosphorylation [GO:0046777]; protein-chromophore linkage [GO:0018298]; red, far-red light phototransduction [GO:0009585]; regulation of transcription, DNA-templated [GO:0006355]; response to red or far red light [GO:0009639]	ATP binding [GO:0005524]; identical protein binding [GO:0042802]; phosphorelay sensor kinase activity [GO:0000155]; protein histidine kinase activity [GO:0004673]; red or far-red light photoreceptor activity [GO:0009883]	intracellular [GO:0005622]
δE	slr0484	3'UTR	two-component sensor histidine kinase	CytoplasmicMembrane	Regulatory functions	NA	NA	NA	NA	NA	phosphorelay sensor kinase activity [GO:0000155]	intracellular [GO:0005622]
δE	slr0533	CDS	two-component sensor histidine kinase	CytoplasmicMembrane	Regulatory functions	NA	NA	CATALYTIC ACTIVITY: ATP + protein L-histidine = ADP + protein N-phospho-L-histidine. {ECO:0000256|SAAS:SAAS00577673}.	NA	NA	ATP binding [GO:0005524]; phosphorelay sensor kinase activity [GO:0000155]	integral component of membrane [GO:0016021]; intracellular [GO:0005622]
δE	slr0687	CDS	probable two-component response regulator	Cytoplasmic	Regulatory functions	NA	NA	NA	NA	NA	NA	NA
δJ	slr0701	CDS	transcriptional regulator	Cytoplasmic	Regulatory functions	NA	NA	NA	NA	regulation of transcription, DNA-templated [GO:0006355]; transcription, DNA-templated [GO:0006351]	DNA binding [GO:0003677]	NA
δE	slr0724	5'UTR	HtaR suppressor protein homolog	Unknown	Regulatory functions	NA	NA	NA	NA	NA	NA	NA
δE	slr0724	CDS	HtaR suppressor protein homolog	Unknown	Regulatory functions	NA	NA	NA	NA	NA	NA	NA
δE	slr0741	5'UTR	transcriptional regulator	Cytoplasmic	Regulatory functions	NA	NA	NA	NA	cellular phosphate ion homeostasis [GO:0030643]; negative regulation of phosphate metabolic process [GO:0045936]; negative regulation of phosphate transmembrane transport [GO:2000186]; phosphate ion transport [GO:0006817]	protein homodimerization activity [GO:0042803]	cytoplasm [GO:0005737]
δE	slr0780	3'UTR	transcriptional repressor NrdR	Cytoplasmic	Regulatory functions	NA	NA	NA	COFACTOR: Name=Zn(2+); Xref=ChEBI:CHEBI:29105; Evidence={ECO:0000255|HAMAP-Rule:MF_00440}; ; Note=Binds 1 zinc ion. {ECO:0000255|HAMAP-Rule:MF_00440};	negative regulation of transcription, DNA-templated [GO:0045892]; transcription, DNA-templated [GO:0006351]	ATP binding [GO:0005524]; DNA binding [GO:0003677]; zinc ion binding [GO:0008270]	NA
δE	slr0989	CDS	probable transcriptional regulatory protein	Cytoplasmic	Regulatory functions	NA	NA	NA	NA	regulation of transcription, DNA-templated [GO:0006355]; transcription, DNA-templated [GO:0006351]	DNA binding [GO:0003677]	cytosol [GO:0005829]
δE	slr0989	3'UTR	probable transcriptional regulatory protein	Cytoplasmic	Regulatory functions	NA	NA	NA	NA	regulation of transcription, DNA-templated [GO:0006355]; transcription, DNA-templated [GO:0006351]	DNA binding [GO:0003677]	cytosol [GO:0005829]
δE	slr1037	CDS	two-component response regulator CheY subfamily	Cytoplasmic	Regulatory functions	NA	NA	NA	NA	phosphorelay signal transduction system [GO:0000160]	NA	intracellular [GO:0005622]
δE	slr1037	3'UTR	two-component response regulator CheY subfamily	Cytoplasmic	Regulatory functions	NA	NA	NA	NA	phosphorelay signal transduction system [GO:0000160]	NA	intracellular [GO:0005622]
δE	slr1037	5'UTR	two-component response regulator CheY subfamily	Cytoplasmic	Regulatory functions	NA	NA	NA	NA	phosphorelay signal transduction system [GO:0000160]	NA	intracellular [GO:0005622]
δE	slr1109	CDS	similar to ankyrin	Unknown	Regulatory functions	Other	NA	NA	NA	NA	NA	NA
δE/δJ	slr1109	5'UTR	similar to ankyrin	Unknown	Regulatory functions	Other	NA	NA	NA	NA	NA	NA
δJ	slr1109	5'UTR	similar to ankyrin	Unknown	Regulatory functions	Other	NA	NA	NA	NA	NA	NA
δE	slr1147	CDS	two-component sensor histidine kinase	CytoplasmicMembrane	Regulatory functions	NA	NA	NA	NA	GO:0006468 protein amino acid phosphorylation GO:0018106 peptidyl-histidine phosphorylation GO:0016310 phosphorylation GO:0006796 phosphate metabolic process	GO:0016775 phosphotransferase activity, nitrogenous group as acceptor GO:0000155 phosphorelay sensor kinase activity GO:0004672 protein kinase activity GO:0004673 protein histidine kinase activity	intracellular [GO:0005622]
δE	slr1147	3'UTR	two-component sensor histidine kinase	CytoplasmicMembrane	Regulatory functions	NA	NA	NA	NA	GO:0006468 protein amino acid phosphorylation GO:0018106 peptidyl-histidine phosphorylation GO:0016310 phosphorylation GO:0006796 phosphate metabolic process	GO:0016775 phosphotransferase activity, nitrogenous group as acceptor GO:0000155 phosphorelay sensor kinase activity GO:0004672 protein kinase activity GO:0004673 protein histidine kinase activity	intracellular [GO:0005622]
δE	slr1147	5'UTR	two-component sensor histidine kinase	CytoplasmicMembrane	Regulatory functions	NA	NA	NA	NA	NA	phosphorelay sensor kinase activity [GO:0000155]	intracellular [GO:0005622]
δE	slr1215	5'UTR	two-component response regulator PatA subfamily	Cytoplasmic	Regulatory functions	NA	NA	NA	NA	heterocyst differentiation [GO:0043158]; phosphorelay signal transduction system [GO:0000160]	NA	cell septum [GO:0030428]; intracellular [GO:0005622]
δE	slr1225	3'UTR	serine/threonine kinase	CytoplasmicMembrane	Regulatory functions	NA	2.7.11.1	CATALYTIC ACTIVITY: ATP + a protein = ADP + a phosphoprotein.	NA	NA	ATP binding [GO:0005524]; protein serine/threonine kinase activity [GO:0004674]	NA
δE	slr1230	CDS	transcriptional regulator, universal stress protein domain	Cytoplasmic	Regulatory functions	NA	NA	NA	NA	response to stress [GO:0006950]	NA	NA
δE	slr1245	CDS	transcriptional regulator	Cytoplasmic	Regulatory functions	NA	NA	NA	NA	transcription, DNA-templated [GO:0006351]	DNA binding [GO:0003677]; transcription factor activity, sequence-specific DNA binding [GO:0003700]	NA
δE	slr1305	CDS	two-component response regulator	CytoplasmicMembrane	Regulatory functions	NA	NA	NA	NA	NA	phosphorelay sensor kinase activity [GO:0000155]	intracellular [GO:0005622]
δE	slr1305	3'UTR	two-component response regulator	CytoplasmicMembrane	Regulatory functions	NA	NA	NA	NA	NA	phosphorelay sensor kinase activity [GO:0000155]	intracellular [GO:0005622]
δE	slr1305	5'UTR	two-component response regulator	CytoplasmicMembrane	Regulatory functions	NA	NA	NA	NA	NA	phosphorelay sensor kinase activity [GO:0000155]	intracellular [GO:0005622]
δE	slr1400	CDS	two-component hybrid sensor and regulator	Cytoplasmic	Regulatory functions	NA	NA	NA	NA	NA	phosphorelay sensor kinase activity [GO:0000155]	intracellular [GO:0005622]
δE	slr1489	CDS	transcriptional regulator	Cytoplasmic	Regulatory functions	NA	NA	NA	NA	GO:0045449 regulation of transcription GO:0006355 regulation of transcription, DNA-dependent	GO:0003677 DNA binding GO:0043565 sequence-specific DNA binding GO:0003700 transcription factor activity	GO:0005622 intracellular
δE	slr1489	5'UTR	transcriptional regulator	Cytoplasmic	Regulatory functions	NA	NA	NA	NA	GO:0045449 regulation of transcription GO:0006355 regulation of transcription, DNA-dependent	GO:0003677 DNA binding GO:0043565 sequence-specific DNA binding GO:0003700 transcription factor activity	GO:0005622 intracellular
δE	slr1588	CDS	two-component transcription regulator	CytoplasmicMembrane	Regulatory functions	NA	NA	NA	NA	phosphorelay signal transduction system [GO:0000160]	NA	intracellular [GO:0005622]
δE	slr1666	5'UTR	pleiotropic regulatory protein homolog	Cytoplasmic	Regulatory functions	NA	NA	NA	NA	NA	NA	NA
δE	slr1738	CDS	transcription regulator Fur family	Cytoplasmic	Regulatory functions	NA	NA	NA	NA	NA	DNA binding [GO:0003677]; transcription factor activity, sequence-specific DNA binding [GO:0003700]	NA
δE	slr1738	3'UTR	transcription regulator Fur family	Cytoplasmic	Regulatory functions	NA	NA	NA	NA	NA	DNA binding [GO:0003677]; transcription factor activity, sequence-specific DNA binding [GO:0003700]	NA
δE	slr1738	5'UTR	transcription regulator Fur family	Cytoplasmic	Regulatory functions	NA	NA	NA	NA	NA	DNA binding [GO:0003677]; transcription factor activity, sequence-specific DNA binding [GO:0003700]	NA
δE	slr1805	CDS	two-component sensor histidine kinase	CytoplasmicMembrane	Regulatory functions	NA	NA	NA	NA	protein-chromophore linkage [GO:0018298]	phosphorelay sensor kinase activity [GO:0000155]	integral component of membrane [GO:0016021]; intracellular [GO:0005622]
δE	slr1805	3'UTR	two-component sensor histidine kinase	CytoplasmicMembrane	Regulatory functions	NA	NA	NA	NA	protein-chromophore linkage [GO:0018298]	phosphorelay sensor kinase activity [GO:0000155]	integral component of membrane [GO:0016021]; intracellular [GO:0005622]
δE	slr1805	5'UTR	two-component sensor histidine kinase	CytoplasmicMembrane	Regulatory functions	NA	NA	NA	NA	protein-chromophore linkage [GO:0018298]	phosphorelay sensor kinase activity [GO:0000155]	integral component of membrane [GO:0016021]; intracellular [GO:0005622]
δE	slr1871	CDS	transcriptional regulator	Cytoplasmic	Regulatory functions	NA	NA	NA	NA	GO:0006355 regulation of transcription, DNA-dependent	GO:0003700 transcription factor activity	NA
δE	slr1919	5'UTR	putative protein kinase	CytoplasmicMembrane	Regulatory functions	NA	NA	NA	NA	NA	ATP binding [GO:0005524]; protein kinase activity [GO:0004672]	NA
δE	slr2031	CDS	putative PP2C-type protein phosphatase, gene required to recover from the nitrogen or sulfate starvation induced stationary phase, Sigma factor SibG regulation protein RsbU	Cytoplasmic	Regulatory functions	NA	NA	NA	NA	NA	GO:0003824 catalytic activity GO:0004721 phosphoprotein phosphatase activity	NA
δE	slr2041	CDS	probable two-component response regulator	CytoplasmicMembrane	Regulatory functions	NA	NA	NA	NA	NA	NA	NA
δE	slr2041	5'UTR	probable two-component response regulator	CytoplasmicMembrane	Regulatory functions	NA	NA	NA	NA	NA	NA	NA
δE	slr2104	5'UTR	two-component hybrid sensor and regulator	CytoplasmicMembrane	Regulatory functions	NA	NA	NA	NA	NA	phosphorelay sensor kinase activity [GO:0000155]	integral component of membrane [GO:0016021]; intracellular [GO:0005622]
δE	slr6041	CDS	two-component sensor histidine kinase	CytoplasmicMembrane	Regulatory functions	NA	NA	NA	NA	NA	ATP binding [GO:0005524]; phosphorelay sensor kinase activity [GO:0000155]	integral component of membrane [GO:0016021]; intracellular [GO:0005622]
δE	sll0184	3'UTR	group2 RNA polymerase sigma factor SigC	Cytoplasmic	Transcription	RNA synthesis, modification, and DNA transcription	NA	NA	NA	DNA-templated transcription, initiation [GO:0006352]	DNA binding [GO:0003677]; sigma factor activity [GO:0016987]; transcription factor activity, sequence-specific DNA binding [GO:0003700]	NA
δE	sll0687	CDS	RNA polymerase ECF-type (group 3) sigma factor	CytoplasmicMembrane	Transcription	RNA synthesis, modification, and DNA transcription	NA	NA	NA	DNA-templated transcription, initiation [GO:0006352]	DNA binding [GO:0003677]; sigma factor activity [GO:0016987]; transcription factor activity, sequence-specific DNA binding [GO:0003700]	NA
δE	sll1043	5'UTR	polyribonucleotide nucleotidyltransferase	Cytoplasmic	Transcription	RNA synthesis, modification, and DNA transcription	2.7.7.8	CATALYTIC ACTIVITY: RNA(n+1) + phosphate = RNA(n) + a nucleoside diphosphate. {ECO:0000255|HAMAP-Rule:MF_01595}.	COFACTOR: Name=Mg(2+); Xref=ChEBI:CHEBI:18420; Evidence={ECO:0000255|HAMAP-Rule:MF_01595};	mRNA catabolic process [GO:0006402]; RNA processing [GO:0006396]	3'-5'-exoribonuclease activity [GO:0000175]; magnesium ion binding [GO:0000287]; polyribonucleotide nucleotidyltransferase activity [GO:0004654]; RNA binding [GO:0003723]	cytoplasm [GO:0005737]
δE	sll2012	CDS	group2 RNA polymerase sigma factor SigD	Cytoplasmic	transcription	NA	NA	NA	NA	GO:0006355 regulation of transcription, DNA-dependent GO:0006352 transcription initiation	GO:0003677 DNA binding GO:0016987 sigma factor activity GO:0003700 transcription factor activity	NA
δE	slr0080	3'UTR	ribonuclease H	Unknown	Transcription	Degradation of RNA	3.1.26.4	CATALYTIC ACTIVITY: Endonucleolytic cleavage to 5'-phosphomonoester.	COFACTOR: Name=Mg(2+); Xref=ChEBI:CHEBI:18420; Evidence={ECO:0000250}; ; Note=Binds 1 Mg(2+) ion per subunit. May bind a second metal ion at a regulatory site, or after substrate binding. {ECO:0000250};	DNA replication, removal of RNA primer [GO:0043137]; RNA phosphodiester bond hydrolysis, endonucleolytic [GO:0090502]	magnesium ion binding [GO:0000287]; nucleic acid binding [GO:0003676]; RNA-DNA hybrid ribonuclease activity [GO:0004523]	cytoplasm [GO:0005737]
δE	slr0080	5'UTR	ribonuclease H	Unknown	Transcription	Degradation of RNA	3.1.26.4	CATALYTIC ACTIVITY: Endonucleolytic cleavage to 5'-phosphomonoester.	COFACTOR: Name=Mg(2+); Xref=ChEBI:CHEBI:18420; Evidence={ECO:0000250}; ; Note=Binds 1 Mg(2+) ion per subunit. May bind a second metal ion at a regulatory site, or after substrate binding. {ECO:0000250};	GO:0043137 DNA replication, removal of RNA primer GO:0090502 RNA phosphodiester bond hydrolysis, endonucleolytic	GO:0003676 nucleic acid binding GO:0004523 ribonuclease H activity	GO:0005737 cytoplasm
δE	slr0080	CDS	ribonuclease H	Unknown	Transcription	Degradation of RNA	3.1.26.4	CATALYTIC ACTIVITY: Endonucleolytic cleavage to 5'-phosphomonoester.	COFACTOR: Name=Mg(2+); Xref=ChEBI:CHEBI:18420; Evidence={ECO:0000250}; ; Note=Binds 1 Mg(2+) ion per subunit. May bind a second metal ion at a regulatory site, or after substrate binding. {ECO:0000250};	DNA replication, removal of RNA primer [GO:0043137]; RNA phosphodiester bond hydrolysis, endonucleolytic [GO:0090502]	magnesium ion binding [GO:0000287]; nucleic acid binding [GO:0003676]; RNA-DNA hybrid ribonuclease activity [GO:0004523]	cytoplasm [GO:0005737]
δJ	slr0551	CDS	Rnase J ribonuclease	Cytoplasmic	Transcription	Degradation of RNA	NA	NA	NA	NA	GO:0003723 RNA binding GO:0016787 hydrolase activity GO:0016788 hydrolase activity, acting on ester bonds GO:0046872 metal ion binding	NA
δE	slr1129	5'UTR	ribonuclease E	Cytoplasmic	Transcription	Degradation of RNA	3.1.26.-	NA	COFACTOR: Name=Mg(2+); Xref=ChEBI:CHEBI:18420; Evidence={ECO:0000250}; ; Note=Binds 1 Mg(2+) ion per subunit. {ECO:0000250};	RNA phosphodiester bond hydrolysis [GO:0090501]; rRNA processing [GO:0006364]	endonuclease activity [GO:0004519]; metal ion binding [GO:0046872]; ribonuclease activity [GO:0004540]; RNA binding [GO:0003723]	cytoplasm [GO:0005737]
δE	slr1130	CDS	ribonuclease HII	Unknown	Transcription	Degradation of RNA	3.1.26.4	NA	NA	NA	GO:0003723 RNA binding GO:0003676 nucleic acid binding GO:0004523 ribonuclease H activity	NA
δE	slr1232	CDS	phosphoprotein substrate of icfG gene cluster	Unknown	Transcription	RNA synthesis, modification, and DNA transcription	NA	NA	NA	regulation of transcription, DNA-templated [GO:0006355]	NA	NA
δE	sll0051	3'UTR	putative cytidine deaminase	Cytoplasmic	Translation	Aminoacyl tRNA synthetases and tRNA modification	NA	NA	NA	RNA modification [GO:0009451]	catalytic activity [GO:0003824]; zinc ion binding [GO:0008270]	NA
δE	sll0051	5'UTR	putative cytidine deaminase	Cytoplasmic	Translation	Aminoacyl tRNA synthetases and tRNA modification	NA	NA	NA	RNA modification [GO:0009451]	catalytic activity [GO:0003824]; zinc ion binding [GO:0008270]	NA
δE	sll0051	CDS	putative cytidine deaminase	Cytoplasmic	Translation	Aminoacyl tRNA synthetases and tRNA modification	NA	NA	NA	GO:0009451 RNA modification	GO:0003824 catalytic activity GO:0016787 hydrolase activity GO:0008270 zinc ion binding	NA
δE	sll0055	5'UTR	processing protease	Unknown	Translation	Degradation of proteins, peptides, and glycopeptides	NA	NA	NA	protein processing [GO:0016485]	metalloendopeptidase activity [GO:0004222]; zinc ion binding [GO:0008270]	NA
δE	sll0136	5'UTR	aminopeptidase P	Cytoplasmic	Translation	Degradation of proteins, peptides, and glycopeptides	NA	NA	NA	NA	NA	NA
δE	sll0179	5'UTR	glutamyl-tRNA synthetase	Cytoplasmic	Translation	Aminoacyl tRNA synthetases and tRNA modification	6.1.1.17	CATALYTIC ACTIVITY: ATP + L-glutamate + tRNA(Glu) = AMP + diphosphate + L-glutamyl-tRNA(Glu). {ECO:0000255|HAMAP-Rule:MF_00022}.	NA	glutamyl-tRNA aminoacylation [GO:0006424]	ATP binding [GO:0005524]; glutamate-tRNA ligase activity [GO:0004818]; tRNA binding [GO:0000049]	cytoplasm [GO:0005737]
δE	sll0189	3'UTR	putative restriction endonuclease (tRNA endonuclease domain)	Unknown	Translation	Aminoacyl tRNA synthetases and tRNA modification	NA	NA	NA	NA	nuclease activity [GO:0004518]; nucleic acid binding [GO:0003676]	NA
δE	sll0195	3'UTR	probable ATP-dependent protease	Cytoplasmic	Translation	Degradation of proteins, peptides, and glycopeptides	NA	NA	NA	NA	ATP-dependent peptidase activity [GO:0004176]	NA
δE	sll0362	5'UTR	alanyl-tRNA synthetase	Cytoplasmic	Translation	Aminoacyl tRNA synthetases and tRNA modification	6.1.1.7	CATALYTIC ACTIVITY: ATP + L-alanine + tRNA(Ala) = AMP + diphosphate + L-alanyl-tRNA(Ala). {ECO:0000255|HAMAP-Rule:MF_00036}.	COFACTOR: Name=Zn(2+); Xref=ChEBI:CHEBI:29105; Evidence={ECO:0000255|HAMAP-Rule:MF_00036}; ; Note=Binds 1 zinc ion per subunit. {ECO:0000255|HAMAP-Rule:MF_00036};	alanyl-tRNA aminoacylation [GO:0006419]; tRNA modification [GO:0006400]	alanine-tRNA ligase activity [GO:0004813]; amino acid binding [GO:0016597]; ATP binding [GO:0005524]; tRNA binding [GO:0000049]; zinc ion binding [GO:0008270]	cytosol [GO:0005829]
δE	sll0454	3'UTR	phenylalanyl-tRNA synthetase alpha chain	Cytoplasmic	Translation	Aminoacyl tRNA synthetases and tRNA modification	6.1.1.20	CATALYTIC ACTIVITY: ATP + L-phenylalanine + tRNA(Phe) = AMP + diphosphate + L-phenylalanyl-tRNA(Phe).	COFACTOR: Name=Mg(2+); Xref=ChEBI:CHEBI:18420; Evidence={ECO:0000250}; ; Note=Binds 2 magnesium ions per tetramer. {ECO:0000250};	phenylalanyl-tRNA aminoacylation [GO:0006432]	ATP binding [GO:0005524]; magnesium ion binding [GO:0000287]; phenylalanine-tRNA ligase activity [GO:0004826]; tRNA binding [GO:0000049]	cytoplasm [GO:0005737]
δE	sll0454	5'UTR	phenylalanyl-tRNA synthetase alpha chain	Cytoplasmic	Translation	Aminoacyl tRNA synthetases and tRNA modification	6.1.1.20	CATALYTIC ACTIVITY: ATP + L-phenylalanine + tRNA(Phe) = AMP + diphosphate + L-phenylalanyl-tRNA(Phe).	COFACTOR: Name=Mg(2+); Xref=ChEBI:CHEBI:18420; Evidence={ECO:0000250}; ; Note=Binds 2 magnesium ions per tetramer. {ECO:0000250};	phenylalanyl-tRNA aminoacylation [GO:0006432]	ATP binding [GO:0005524]; magnesium ion binding [GO:0000287]; phenylalanine-tRNA ligase activity [GO:0004826]; tRNA binding [GO:0000049]	cytoplasm [GO:0005737]
δE	sll0454	CDS	phenylalanyl-tRNA synthetase alpha chain	Cytoplasmic	Translation	Aminoacyl tRNA synthetases and tRNA modification	6.1.1.20	CATALYTIC ACTIVITY: ATP + L-phenylalanine + tRNA(Phe) = AMP + diphosphate + L-phenylalanyl-tRNA(Phe).	COFACTOR: Name=Mg(2+); Xref=ChEBI:CHEBI:18420; Evidence={ECO:0000250}; ; Note=Binds 2 magnesium ions per tetramer. {ECO:0000250};	phenylalanyl-tRNA aminoacylation [GO:0006432]	ATP binding [GO:0005524]; magnesium ion binding [GO:0000287]; phenylalanine-tRNA ligase activity [GO:0004826]; tRNA binding [GO:0000049]	cytoplasm [GO:0005737]
δE	sll0685	CDS	protein disulfide oxidoreductase	Unknown	Translation	Protein modification and translation factors	NA	NA	NA	cell redox homeostasis [GO:0045454]; cellular response to oxidative stress [GO:0034599]; glycerol ether metabolic process [GO:0006662]; oxidation-reduction process [GO:0055114]; protein folding [GO:0006457]; sulfate assimilation [GO:0000103]	oxidoreductase activity, acting on a sulfur group of donors, disulfide as acceptor [GO:0016671]; protein disulfide oxidoreductase activity [GO:0015035]	cytoplasm [GO:0005737]
δE	sll0817	CDS	tRNA delta-2-isopentenylpyrophosphate (IPP) transferase	Cytoplasmic	Translation	Aminoacyl tRNA synthetases and tRNA modification	2.5.1.75	CATALYTIC ACTIVITY: Dimethylallyl diphosphate + adenine(37) in tRNA = diphosphate + N(6)-dimethylallyladenine(37) in tRNA. {ECO:0000255|HAMAP-Rule:MF_00185}.	COFACTOR: Name=Mg(2+); Xref=ChEBI:CHEBI:18420; Evidence={ECO:0000255|HAMAP-Rule:MF_00185};	tRNA modification [GO:0006400]	ATP binding [GO:0005524]; tRNA dimethylallyltransferase activity [GO:0052381]	NA
δE	sll0825	CDS	polyA polymerase	Cytoplasmic	Translation	Ribosomal proteins: synthesis and modification	NA	NA	NA	NA	NA	NA
δE	sll0844	5'UTR	tRNA (5-methylaminomethyl-2-thiouridylate)-methyltransferase	Cytoplasmic	Translation	Aminoacyl tRNA synthetases and tRNA modification	2.8.1.13	CATALYTIC ACTIVITY: A [protein]-S-sulfanyl-L-cysteine + uridine(34) in tRNA + ATP + reduced acceptor = a [protein]-L-cysteine + 2-thiouridine(34) in tRNA + AMP + diphosphate + acceptor. {ECO:0000255|HAMAP-Rule:MF_00144}.	NA	tRNA wobble position uridine thiolation [GO:0002143]	ATP binding [GO:0005524]; sulfurtransferase activity [GO:0016783]; tRNA binding [GO:0000049]	cytoplasm [GO:0005737]
δE	sll0996	5'UTR	tRNA-2-methylthio-N(6)-dimethylallyladenosine synthase	Cytoplasmic	Translation	Aminoacyl tRNA synthetases and tRNA modification	2.8.4.3	CATALYTIC ACTIVITY: N(6)-dimethylallyladenine(37) in tRNA + sulfur-(sulfur carrier) + 2 S-adenosyl-L-methionine + reduced electron acceptor = 2-methylthio-N(6)-dimethylallyladenine(37) in tRNA + S-adenosyl-L-homocysteine + (sulfur carrier) + L-methionine + 5'-deoxyadenosine + electron acceptor. {ECO:0000255|HAMAP-Rule:MF_01864}.	COFACTOR: Name=[4Fe-4S] cluster; Xref=ChEBI:CHEBI:49883; Evidence={ECO:0000255|HAMAP-Rule:MF_01864}; ; Note=Binds 2 [4Fe-4S] clusters. One cluster is coordinated with 3 cysteines and an exchangeable S-adenosyl-L-methionine. {ECO:0000255|HAMAP-Rule:MF_01864};	tRNA methylthiolation [GO:0035600]	4 iron, 4 sulfur cluster binding [GO:0051539]; iron ion binding [GO:0005506]; methylthiotransferase activity [GO:0035596]	cytoplasm [GO:0005737]
δE	sll1074	5'UTR	leucyl-tRNA synthetase	Cytoplasmic	Translation	Aminoacyl tRNA synthetases and tRNA modification	6.1.1.4	CATALYTIC ACTIVITY: ATP + L-leucine + tRNA(Leu) = AMP + diphosphate + L-leucyl-tRNA(Leu). {ECO:0000255|HAMAP-Rule:MF_00049}.	NA	leucyl-tRNA aminoacylation [GO:0006429]	aminoacyl-tRNA editing activity [GO:0002161]; ATP binding [GO:0005524]; leucine-tRNA ligase activity [GO:0004823]	cytoplasm [GO:0005737]
δE	sll1144	5'UTR	ribosomal RNA small subunit methyltransferase H	Cytoplasmic	Translation	Aminoacyl tRNA synthetases and tRNA modification	2.1.1.199	CATALYTIC ACTIVITY: S-adenosyl-L-methionine + cytosine(1402) in 16S rRNA = S-adenosyl-L-homocysteine + N(4)-methylcytosine(1402) in 16S rRNA. {ECO:0000255|HAMAP-Rule:MF_01007}.	NA	rRNA base methylation [GO:0070475]	rRNA (cytosine-N4-)-methyltransferase activity [GO:0071424]	cytoplasm [GO:0005737]
δE	sll1198	3'UTR	tRNA (guanine-N1)-methyltransferase	Cytoplasmic	Translation	Aminoacyl tRNA synthetases and tRNA modification	2.1.1.228	CATALYTIC ACTIVITY: S-adenosyl-L-methionine + guanine(37) in tRNA = S-adenosyl-L-homocysteine + N(1)-methylguanine(37) in tRNA.	NA	tRNA methylation [GO:0030488]	tRNA (guanine(37)-N(1))-methyltransferase activity [GO:0052906]; tRNA (guanine-N1-)-methyltransferase activity [GO:0009019]	cytoplasm [GO:0005737]
δE	sll1348	CDS	epoxyqueuosine reductase, tRNA modification	Cytoplasmic	Translation	Aminoacyl tRNA synthetases and tRNA modification	1.17.99.6	CATALYTIC ACTIVITY: Queuosine(34) in tRNA + acceptor + H(2)O = epoxyqueuosine(34) in tRNA + reduced acceptor. {ECO:0000255|HAMAP-Rule:MF_00916}.	NA	queuosine biosynthetic process [GO:0008616]; tRNA processing [GO:0008033]	4 iron, 4 sulfur cluster binding [GO:0051539]; epoxyqueuosine reductase activity [GO:0052693]; metal ion binding [GO:0046872]	cytoplasm [GO:0005737]
δE	sll1553	5'UTR	phenylalanyl-tRNA synthetase	Cytoplasmic	Translation	Aminoacyl tRNA synthetases and tRNA modification	6.1.1.20	CATALYTIC ACTIVITY: ATP + L-phenylalanine + tRNA(Phe) = AMP + diphosphate + L-phenylalanyl-tRNA(Phe).	COFACTOR: Name=Mg(2+); Xref=ChEBI:CHEBI:18420; Evidence={ECO:0000250}; ; Note=Binds 2 magnesium ions per tetramer. {ECO:0000250};	phenylalanyl-tRNA aminoacylation [GO:0006432]; tRNA processing [GO:0008033]	ATP binding [GO:0005524]; magnesium ion binding [GO:0000287]; phenylalanine-tRNA ligase activity [GO:0004826]; tRNA binding [GO:0000049]	phenylalanine-tRNA ligase complex [GO:0009328]
δE	sll1767	3'UTR	30S ribosomal protein S6	Unknown	Translation	Ribosomal proteins: synthesis and modification	NA	NA	NA	translation [GO:0006412]	small ribosomal subunit rRNA binding [GO:0070181]; structural constituent of ribosome [GO:0003735]	cytosolic small ribosomal subunit [GO:0022627]
δE	sll1767	5'UTR	30S ribosomal protein S6	Unknown	Translation	Ribosomal proteins: synthesis and modification	NA	NA	NA	translation [GO:0006412]	small ribosomal subunit rRNA binding [GO:0070181]; structural constituent of ribosome [GO:0003735]	NA
δE	sll1767	CDS	30S ribosomal protein S6	Unknown	Translation	Ribosomal proteins: synthesis and modification	NA	NA	NA	translation [GO:0006412]	small ribosomal subunit rRNA binding [GO:0070181]; structural constituent of ribosome [GO:0003735]	NA
δE	sll1870	3'UTR	peptide chain release factor 2	Cytoplasmic	Translation	Protein modification and translation factors	NA	NA	NA	NA	ribosome binding [GO:0043022]; translation release factor activity, codon specific [GO:0016149]	cytoplasm [GO:0005737]
δE	sll2001	5'UTR	leucine aminopeptidase	Cytoplasmic	Translation	Protein modification and translation factors	3.4.11.1; 3.4.11.10	CATALYTIC ACTIVITY: Release of an N-terminal amino acid, Xaa-|-Yaa-, in which Xaa is preferably Leu, but may be other amino acids including Pro although not Arg or Lys, and Yaa may be Pro. Amino acid amides and methyl esters are also readily hydrolyzed, but rates on arylamides are exceedingly low.; CATALYTIC ACTIVITY: Release of an N-terminal amino acid, preferentially leucine, but not glutamic o…	COFACTOR: Name=Mn(2+); Xref=ChEBI:CHEBI:29035; Evidence={ECO:0000250}; ; Note=Binds 2 manganese ions per subunit. {ECO:0000250};	NA	aminopeptidase activity [GO:0004177]; manganese ion binding [GO:0030145]; metalloexopeptidase activity [GO:0008235]	cytoplasm [GO:0005737]
δE	slr0033	3'UTR	glutamyl-tRNA(Gln) amidotransferase subunit C	Cytoplasmic	Translation	Aminoacyl tRNA synthetases and tRNA modification	6.3.5.-	CATALYTIC ACTIVITY: ATP + L-glutamyl-tRNA(Gln) + L-glutamine = ADP + phosphate + L-glutaminyl-tRNA(Gln) + L-glutamate.; CATALYTIC ACTIVITY: ATP + L-aspartyl-tRNA(Asn) + L-glutamine = ADP + phosphate + L-asparaginyl-tRNA(Asn) + L-glutamate.	NA	regulation of translational fidelity [GO:0006450]; translation [GO:0006412]	ATP binding [GO:0005524]; glutaminyl-tRNA synthase (glutamine-hydrolyzing) activity [GO:0050567]	NA
δE	slr0050	3'UTR	Ribonuclease Z (RNase Z)	Cytoplasmic	Translation	Aminoacyl tRNA synthetases and tRNA modification	3.1.26.11	CATALYTIC ACTIVITY: Endonucleolytic cleavage of RNA, removing extra 3' nucleotides from tRNA precursor, generating 3' termini of tRNAs. A 3'-hydroxy group is left at the tRNA terminus and a 5'-phosphoryl group is left at the trailer molecule. {ECO:0000255|HAMAP-Rule:MF_01818}.	COFACTOR: Name=Zn(2+); Xref=ChEBI:CHEBI:29105; Evidence={ECO:0000255|HAMAP-Rule:MF_01818}; ; Note=Binds 2 Zn(2+) ions. {ECO:0000255|HAMAP-Rule:MF_01818};	tRNA 3'-trailer cleavage, endonucleolytic [GO:0034414]	3'-tRNA processing endoribonuclease activity [GO:0042781]; zinc ion binding [GO:0008270]	NA
δE	slr0082	CDS	Ribosomal protein S12 methylthiotransferase RimO	Cytoplasmic	Translation	Ribosomal proteins: synthesis and modification	2.8.4.4	CATALYTIC ACTIVITY: L-aspartate-[ribosomal protein S12] + sulfur-(sulfur carrier) + 2 S-adenosyl-L-methionine = 3-methylthio-L-aspartate-[ribosomal protein S12] + S-adenosyl-L-homocysteine + (sulfur carrier) + L-methionine + 5'-deoxyadenosine. {ECO:0000255|HAMAP-Rule:MF_01865}.	COFACTOR: Name=[4Fe-4S] cluster; Xref=ChEBI:CHEBI:49883; Evidence={ECO:0000255|HAMAP-Rule:MF_01865}; ; Note=Binds 2 [4Fe-4S] clusters. One cluster is coordinated with 3 cysteines and an exchangeable S-adenosyl-L-methionine. {ECO:0000255|HAMAP-Rule:MF_01865};	tRNA methylthiolation [GO:0035600]	4 iron, 4 sulfur cluster binding [GO:0051539]; aspartic acid methylthiotransferase activity [GO:0035599]; iron ion binding [GO:0005506]	NA
δE	slr0120	CDS	probable tRNA/rRNA methyltransferase	Cytoplasmic	Translation	Aminoacyl tRNA synthetases and tRNA modification	2.1.1.200	CATALYTIC ACTIVITY: S-adenosyl-L-methionine + cytidine(32) in tRNA = S-adenosyl-L-homocysteine + 2'-O-methylcytidine(32) in tRNA. {ECO:0000256|RuleBase:RU362024}.; CATALYTIC ACTIVITY: S-adenosyl-L-methionine + uridine(32) in tRNA = S-adenosyl-L-homocysteine + 2'-O-methyluridine(32) in tRNA. {ECO:0000256|RuleBase:RU362024}.	NA	tRNA nucleoside ribose methylation [GO:0002128]	RNA binding [GO:0003723]; tRNA (cytosine-2'-O-)-methyltransferase activity [GO:0052666]; tRNA (uracil-2'-O-)-methyltransferase activity [GO:0052665]	cytosol [GO:0005829]
δE	slr0220	5'UTR	glycyl-tRNA synthetase beta chain	Cytoplasmic	Translation	Aminoacyl tRNA synthetases and tRNA modification	6.1.1.14	CATALYTIC ACTIVITY: ATP + glycine + tRNA(Gly) = AMP + diphosphate + glycyl-tRNA(Gly).	NA	arginyl-tRNA aminoacylation [GO:0006420]; glycyl-tRNA aminoacylation [GO:0006426]	arginine-tRNA ligase activity [GO:0004814]; ATP binding [GO:0005524]; glycine-tRNA ligase activity [GO:0004820]	cytosol [GO:0005829]
δE	slr0357	5'UTR	histidyl-tRNA synthetase	Cytoplasmic	Translation	Aminoacyl tRNA synthetases and tRNA modification	6.1.1.21	CATALYTIC ACTIVITY: ATP + L-histidine + tRNA(His) = AMP + diphosphate + L-histidyl-tRNA(His).	NA	histidyl-tRNA aminoacylation [GO:0006427]	ATP binding [GO:0005524]; histidine-tRNA ligase activity [GO:0004821]	cytoplasm [GO:0005737]
δE	slr0457	CDS	tRNA pseudouridine synthase B	Cytoplasmic	Translation	Aminoacyl tRNA synthetases and tRNA modification	5.4.99.25	CATALYTIC ACTIVITY: tRNA uridine(55) = tRNA pseudouridine(55). {ECO:0000255|HAMAP-Rule:MF_01080}.	NA	mRNA pseudouridine synthesis [GO:1990481]; tRNA modification [GO:0006400]; tRNA pseudouridine synthesis [GO:0031119]	pseudouridine synthase activity [GO:0009982]; RNA binding [GO:0003723]	NA
δE	slr0483	3'UTR	putative cyanobacterial aminoacyl-tRNA synthetase, CAAD	CytoplasmicMembrane	Translation	Aminoacyl tRNA synthetases and tRNA modification	NA	NA	NA	NA	NA	integral component of membrane [GO:0016021]
δE	slr0483	CDS	putative cyanobacterial aminoacyl-tRNA synthetase, CAAD	CytoplasmicMembrane	Translation	Aminoacyl tRNA synthetases and tRNA modification	NA	NA	NA	NA	NA	integral component of membrane [GO:0016021]
δE	slr0517	CDS	peptide alpha-N-acetyltransferase activity, protein modification	Unknown	Translation	Protein modification and translation factors	NA	NA	NA	N-terminal protein amino acid acetylation [GO:0006474]	peptide alpha-N-acetyltransferase activity [GO:0004596]	protein acetyltransferase complex [GO:0031248]
δE	slr0612	CDS	probable pseudouridine synthase	Cytoplasmic	Translation	Aminoacyl tRNA synthetases and tRNA modification	5.4.99.-	CATALYTIC ACTIVITY: RNA uridine = RNA pseudouridine.	NA	enzyme-directed rRNA pseudouridine synthesis [GO:0000455]	pseudouridine synthase activity [GO:0009982]; RNA binding [GO:0003723]	cytosol [GO:0005829]
δE	slr0628	3'UTR	30S ribosomal protein S14	Cytoplasmic	Translation	Ribosomal proteins: synthesis and modification	NA	NA	NA	translation [GO:0006412]	rRNA binding [GO:0019843]; structural constituent of ribosome [GO:0003735]	small ribosomal subunit [GO:0015935]
δE/δJ	slr0628	5'UTR	30S ribosomal protein S14	Cytoplasmic	Translation	Ribosomal proteins: synthesis and modification	NA	NA	NA	translation [GO:0006412]	rRNA binding [GO:0019843]; structural constituent of ribosome [GO:0003735]	small ribosomal subunit [GO:0015935]
δE	slr0628	CDS	30S ribosomal protein S14	Cytoplasmic	Translation	Ribosomal proteins: synthesis and modification	NA	NA	NA	translation [GO:0006412]	rRNA binding [GO:0019843]; structural constituent of ribosome [GO:0003735]	small ribosomal subunit [GO:0015935]
δE	slr0713	3'UTR	tRNA-guanine transglycosylase	Cytoplasmic	Translation	Aminoacyl tRNA synthetases and tRNA modification	2.4.2.29	CATALYTIC ACTIVITY: Guanine(34) in tRNA + queuine = queuosine(34) in tRNA + guanine.; CATALYTIC ACTIVITY: Guanine(34) in tRNA + 7-aminomethyl-7-carbaguanine = 7-aminomethyl-7-carbaguanine(34) in tRNA + guanine.	COFACTOR: Name=Zn(2+); Xref=ChEBI:CHEBI:29105; Evidence={ECO:0000250}; ; Note=Binds 1 zinc ion per subunit. {ECO:0000250};	queuosine biosynthetic process [GO:0008616]; tRNA modification [GO:0006400]	metal ion binding [GO:0046872]; queuine tRNA-ribosyltransferase activity [GO:0008479]	cytoplasm [GO:0005737]
δE	slr0722	CDS	Ribosomal RNA small subunit methyltransferase E (RmsE)	Unknown	Translation	Ribosomal proteins: synthesis and modification	2.1.1.193	CATALYTIC ACTIVITY: S-adenosyl-L-methionine + uracil(1498) in 16S rRNA = S-adenosyl-L-homocysteine + N(3)-methyluracil(1498) in 16S rRNA.	NA	rRNA processing [GO:0006364]	kinase activity [GO:0016301]; methyltransferase activity [GO:0008168]	NA
δE	slr0786	CDS	methionine aminopeptidase	Cytoplasmic	Translation	Protein modification and translation factors	3.4.11.18	CATALYTIC ACTIVITY: Release of N-terminal amino acids, preferentially methionine, from peptides and arylamides. {ECO:0000255|HAMAP-Rule:MF_01974}.	COFACTOR: Name=Co(2+); Xref=ChEBI:CHEBI:48828; Evidence={ECO:0000255|HAMAP-Rule:MF_01974}; Name=Zn(2+); Xref=ChEBI:CHEBI:29105; Evidence={ECO:0000255|HAMAP-Rule:MF_01974}; Name=Mn(2+); Xref=ChEBI:CHEBI:29035; Evidence={ECO:0000255|HAMAP-Rule:MF_01974}; Name=Fe(2+); Xref=ChEBI:CHEBI:29033; Evidence={ECO:0000255|HAMAP-Rule:MF_01974}; ; Note=Binds 2 divalent metal cations per subunit. Has a high-aff…	protein initiator methionine removal [GO:0070084]	metal ion binding [GO:0046872]; metalloaminopeptidase activity [GO:0070006]	NA
δE	slr0807	5'UTR	probable o-sialoglycoprotein endopeptidase	Extracellular	Translation	Degradation of proteins, peptides, and glycopeptides	2.3.1.234	CATALYTIC ACTIVITY: L-threonylcarbamoyladenylate + adenine(37) in tRNA = AMP + N(6)-L-threonylcarbamoyladenine(37) in tRNA. {ECO:0000255|HAMAP-Rule:MF_01445}.	COFACTOR: Name=Fe(2+); Xref=ChEBI:CHEBI:29033; Evidence={ECO:0000255|HAMAP-Rule:MF_01445}; ; Note=Binds 1 Fe(2+) ion per subunit. {ECO:0000255|HAMAP-Rule:MF_01445};	tRNA threonylcarbamoyladenosine modification [GO:0002949]	iron ion binding [GO:0005506]; metalloendopeptidase activity [GO:0004222]; N(6)-L-threonylcarbamoyladenine synthase [GO:0061711]	cytoplasm [GO:0005737]
δE	slr0853	3'UTR	ribosomal-protein-alanine acetyltransferase	Cytoplasmic	Translation	Ribosomal proteins: synthesis and modification	NA	NA	NA	NA	NA	NA
δE	slr0958	3'UTR	cysteinyl-tRNA synthetase	Cytoplasmic	Translation	Aminoacyl tRNA synthetases and tRNA modification	6.1.1.16	CATALYTIC ACTIVITY: ATP + L-cysteine + tRNA(Cys) = AMP + diphosphate + L-cysteinyl-tRNA(Cys).	COFACTOR: Name=Zn(2+); Xref=ChEBI:CHEBI:29105; Evidence={ECO:0000250}; ; Note=Binds 1 zinc ion per subunit. {ECO:0000250};	cysteinyl-tRNA aminoacylation [GO:0006423]	ATP binding [GO:0005524]; cysteine-tRNA ligase activity [GO:0004817]; zinc ion binding [GO:0008270]	cytosol [GO:0005829]
δE	slr0974	3'UTR	initiation factor IF-3	Cytoplasmic	Translation	Protein modification and translation factors	NA	NA	NA	NA	translation initiation factor activity [GO:0003743]	cytoplasm [GO:0005737]
δE	slr0974	5'UTR	initiation factor IF-3	Cytoplasmic	Translation	Protein modification and translation factors	NA	NA	NA	NA	translation initiation factor activity [GO:0003743]	cytoplasm [GO:0005737]
δE	slr0974	CDS	initiation factor IF-3	Cytoplasmic	Translation	Protein modification and translation factors	NA	NA	NA	NA	translation initiation factor activity [GO:0003743]	cytoplasm [GO:0005737]
δE	slr1534	3'UTR	putative carboxypeptidase	Cytoplasmic	Translation	Protein modification and translation factors	3.4.16.-	NA	NA	NA	carboxypeptidase activity [GO:0004180]; serine-type peptidase activity [GO:0008236]	NA
δE	slr1560	5'UTR	histidyl tRNA synthetase	Cytoplasmic	Translation	Aminoacyl tRNA synthetases and tRNA modification	NA	NA	NA	histidine biosynthetic process [GO:0000105]; histidyl-tRNA aminoacylation [GO:0006427]	histidine-tRNA ligase activity [GO:0004821]	cytoplasm [GO:0005737]
δE	slr1592	CDS	probable pseudouridine synthase	Cytoplasmic	Translation	NA	NA	NA	NA	GO:0009451 RNA modification GO:0001522 pseudouridine synthesis	GO:0003723 RNA binding GO:0009982 pseudouridine synthase activity	NA
δE	slr1592	5'UTR	probable pseudouridine synthase	Cytoplasmic	Translation	NA	NA	NA	NA	GO:0009451 RNA modification GO:0001522 pseudouridine synthesis	GO:0003723 RNA binding GO:0009982 pseudouridine synthase activity	NA
δE	slr1884	5'UTR	tryptophanyl-tRNA synthetase	Cytoplasmic	Translation	Aminoacyl tRNA synthetases and tRNA modification	6.1.1.2	CATALYTIC ACTIVITY: ATP + L-tryptophan + tRNA(Trp) = AMP + diphosphate + L-tryptophyl-tRNA(Trp).	NA	tryptophanyl-tRNA aminoacylation [GO:0006436]	ATP binding [GO:0005524]; tryptophan-tRNA ligase activity [GO:0004830]	cytoplasm [GO:0005737]
δJ	slr1938	5'UTR	putative translation initiation factor EIF-2b subunit 1	Cytoplasmic	Translation	Protein modification and translation factors	5.3.1.23	CATALYTIC ACTIVITY: S-methyl-5-thio-alpha-D-ribose 1-phosphate = S-methyl-5-thio-D-ribulose 1-phosphate. {ECO:0000255|HAMAP-Rule:MF_01678}.	NA	L-methionine biosynthetic process from methylthioadenosine [GO:0019509]; L-methionine biosynthetic process from S-adenosylmethionine [GO:0019284]	S-methyl-5-thioribose-1-phosphate isomerase activity [GO:0046523]	cytoplasm [GO:0005737]
δE	slr2042	CDS	putative metallopeptidase	CytoplasmicMembrane	Translation	Degradation of proteins, peptides, and glycopeptides	NA	NA	NA	NA	metallopeptidase activity [GO:0008237]	NA
δE	ssl3379	CDS	ATP-dependent Clp protease adapter protein ClpS	Unknown	Translation	Degradation of proteins, peptides, and glycopeptides	NA	NA	NA	protein catabolic process [GO:0030163]; proteolysis [GO:0006508]	NA	NA
δE	ssl3379	3'UTR	ATP-dependent Clp protease adapter protein ClpS	Unknown	Translation	Degradation of proteins, peptides, and glycopeptides	NA	NA	NA	protein catabolic process [GO:0030163]; proteolysis [GO:0006508]	NA	NA
δE	ssl3379	5'UTR	ATP-dependent Clp protease adapter protein ClpS	Unknown	Translation	Degradation of proteins, peptides, and glycopeptides	NA	NA	NA	protein catabolic process [GO:0030163]; proteolysis [GO:0006508]	NA	NA
δE	ssr1720	CDS	similar to tyrosyl tRNA synthetase	Cytoplasmic	Translation	NA	NA	NA	NA	NA	GO:0003723 RNA binding	NA
δE	sll0108	5'UTR	ammonium/methylammonium permease	CytoplasmicMembrane	Transport and binding proteins	NA	NA	NA	NA	ammonium transmembrane transport [GO:0072488]; cellular response to nitrogen starvation [GO:0006995]; nitrogen utilization [GO:0019740]; organic cation transport [GO:0015695]	ammonium transmembrane transporter activity [GO:0008519]	integral component of plasma membrane [GO:0005887]
δE	sll0108	CDS	ammonium/methylammonium permease	CytoplasmicMembrane	Transport and binding proteins	NA	NA	NA	NA	ammonium transmembrane transport [GO:0072488]; cellular response to nitrogen starvation [GO:0006995]; nitrogen utilization [GO:0019740]; organic cation transport [GO:0015695]	ammonium transmembrane transporter activity [GO:0008519]	integral component of plasma membrane [GO:0005887]
δE	sll0238	CDS	gph phosphoglycolate phosphatase	CytoplasmicMembrane	Transport and binding proteins	NA	NA	NA	NA	transport [GO:0006810]	NA	integral component of membrane [GO:0016021]
δE	sll0240	CDS	ABC transporter ATP-binding protein	CytoplasmicMembrane	Transport and binding proteins	NA	NA	NA	NA	NA	ATPase activity [GO:0016887]; ATP binding [GO:0005524]	NA
δE	sll0355	CDS	uncharacterized transporter	CytoplasmicMembrane	Transport and binding proteins	NA	NA	NA	NA	transport [GO:0006810]	NA	integral component of membrane [GO:0016021]; plasma membrane [GO:0005886]
δE	sll0384	CDS	unknown protein	CytoplasmicMembrane	Transport and binding proteins	NA	NA	NA	NA	GO:0009236 cobalamin biosynthetic process GO:0006824 cobalt ion transport	GO:0015087 cobalt ion transmembrane transporter activity	NA
δE	sll0385	3'UTR	ATP-binding protein of ABC transporter	CytoplasmicMembrane	Transport and binding proteins	NA	3.6.3.-	NA	NA	transport [GO:0006810]	ATPase activity [GO:0016887]; ATP binding [GO:0005524]	plasma membrane [GO:0005886]
δE	sll0385	CDS	ATP-binding protein of ABC transporter	CytoplasmicMembrane	Transport and binding proteins	NA	3.6.3.-	NA	NA	transport [GO:0006810]	ATPase activity [GO:0016887]; ATP binding [GO:0005524]	plasma membrane [GO:0005886]
δE	sll0477	CDS	putative biopolymer transport ExbB-like protein	CytoplasmicMembrane	Transport and binding proteins	NA	NA	NA	NA	NA	protein transporter activity [GO:0008565]	integral component of membrane [GO:0016021]; plasma membrane [GO:0005886]
δE	sll0489	5'UTR	ATP-binding protein of ABC transporter	Cytoplasmic	Transport and binding proteins	NA	NA	NA	NA	NA	ATPase activity [GO:0016887]; ATP binding [GO:0005524]	NA
δE	sll0536	5'UTR	probable potassium channel protein	CytoplasmicMembrane	Transport and binding proteins	NA	NA	NA	NA	potassium ion transport [GO:0006813]	cation transmembrane transporter activity [GO:0008324]	integral component of membrane [GO:0016021]
δE	sll0609	3'UTR	hypothetical protein	CytoplasmicMembrane	Transport and binding proteins	NA	NA	NA	NA	NA	NA	integral component of membrane [GO:0016021]
δE	sll0609	CDS	hypothetical protein	CytoplasmicMembrane	Transport and binding proteins	NA	NA	NA	NA	NA	NA	integral component of membrane [GO:0016021]
δE	sll0679	3'UTR	periplasmic phosphate-binding protein of ABC transporter	CytoplasmicMembrane	Transport and binding proteins	NA	NA	NA	NA	cellular response to phosphate starvation [GO:0016036]; phosphate ion transmembrane transport [GO:0035435]; phosphate ion transport [GO:0006817]	phosphate ion binding [GO:0042301]; phosphate ion transmembrane-transporting ATPase activity [GO:0015415]	plasma membrane [GO:0005886]
δJ	sll0681	CDS	phosphate transport system permease protein PstC homolog	CytoplasmicMembrane	Transport and binding proteins	NA	NA	NA	NA	NA	NA	NA
δJ	sll0682	CDS	phosphate transport system permease protein PstA homolog	CytoplasmicMembrane	Transport and binding proteins	NA	NA	NA	NA	NA	NA	NA
δJ	sll0684	3'UTR	phosphate transport ATP-binding protein PstB homolog	CytoplasmicMembrane	Transport and binding proteins	NA	3.6.3.27	CATALYTIC ACTIVITY: ATP + H(2)O + phosphate(Out) = ADP + phosphate + phosphate(In). {ECO:0000255|HAMAP-Rule:MF_01702}.	NA	NA	ATP binding [GO:0005524]; inorganic phosphate transmembrane transporter activity [GO:0005315]; phosphate ion transmembrane-transporting ATPase activity [GO:0015415]	ATP-binding cassette (ABC) transporter complex [GO:0043190]
δE	sll0737	5'UTR	polysaccharide transmembrane transporter Wzy	CytoplasmicMembrane	Transport and binding proteins	NA	NA	NA	NA	NA	NA	integral component of membrane [GO:0016021]
δE	sll0738	CDS	molybdate-binding periplasmic protein	Unknown	Transport and binding proteins	NA	NA	NA	NA	GO:0015689 molybdate ion transport GO:0006810 transport	GO:0015412 molybdate transmembrane-transporting ATPase activity GO:0005215 transporter activity	GO:0030288 outer membrane-bounded periplasmic space
δE	sll0739	CDS	ATP-binding protein of molybdate ABC transporter	CytoplasmicMembrane	Transport and binding proteins	NA	NA	NA	NA	GO:0015689 molybdate ion transport GO:0006810 transport	GO:0005524 ATP binding GO:0016887 ATPase activity GO:0015098 molybdate ion transmembrane transporter activity GO:0017111 nucleoside-triphosphatase activity GO:0000166 nucleotide binding GO:0005215 transporter activity	GO:0016021 integral to membrane GO:0016020 membrane
δE	sll0759	3'UTR	ABC transporter ATP-binding protein	CytoplasmicMembrane	Transport and binding proteins	NA	NA	NA	NA	NA	ATPase activity [GO:0016887]; ATP binding [GO:0005524]	NA
δE	sll0759	CDS	ABC transporter ATP-binding protein	CytoplasmicMembrane	Transport and binding proteins	NA	NA	NA	NA	NA	ATPase activity [GO:0016887]; ATP binding [GO:0005524]	NA
δE	sll0764	5'UTR	urea transport system ATP-binding protein	Cytoplasmic	Transport and binding proteins	NA	NA	NA	NA	NA	NA	NA
δE	sll0855	3'UTR	putative channel transporter	CytoplasmicMembrane	Transport and binding proteins	NA	NA	NA	NA	NA	voltage-gated chloride channel activity [GO:0005247]	integral component of membrane [GO:0016021]
δE	sll0993	5'UTR	potassium channel	CytoplasmicMembrane	Transport and binding proteins	NA	NA	NA	NA	potassium ion transport [GO:0006813]	cation transmembrane transporter activity [GO:0008324]	integral component of membrane [GO:0016021]
δE	sll0993	CDS	potassium channel	CytoplasmicMembrane	Transport and binding proteins	NA	NA	NA	NA	potassium ion transport [GO:0006813]	cation transmembrane transporter activity [GO:0008324]	integral component of membrane [GO:0016021]
δE	sll1041	CDS	similar to sulfate transport ATP-binding protein CysA	CytoplasmicMembrane	Transport and binding proteins	NA	NA	NA	NA	NA	ATPase activity [GO:0016887]; ATP binding [GO:0005524]	NA
δE	sll1076	CDS	cation-transporting ATPase PacL	CytoplasmicMembrane	Transport and binding proteins	NA	NA	NA	NA	NA	NA	NA
δE/δJ	sll1087	5'UTR	similar to sodium/glucose cotransporter	CytoplasmicMembrane	Transport and binding proteins	NA	NA	NA	NA	NA	urea transmembrane transporter activity [GO:0015204]	integral component of membrane [GO:0016021]
δE	sll1181	3'UTR	polysaccharide transmembrane transporter	CytoplasmicMembrane	Transport and binding proteins	NA	NA	NA	NA	NA	NA	NA
δE	sll1192	CDS	putative fluoride ion transporter CrcB	CytoplasmicMembrane	Transport and binding proteins	NA	NA	NA	NA	NA	inorganic anion transmembrane transporter activity [GO:0015103]	integral component of plasma membrane [GO:0005887]
δE	sll1202	CDS	iron(III) dicitrate-binding protein of ABC transporter, FecB homolog	Unknown	Transport and binding proteins	NA	NA	NA	NA	NA	NA	NA
δE	sll1204	CDS	similar to macrolide efflux protein	CytoplasmicMembrane	Transport and binding proteins	NA	NA	NA	NA	transmembrane transport [GO:0055085]	NA	integral component of membrane [GO:0016021]
δE	sll1206	3'UTR	ferric aerobactin receptor, FhuA homolog	OuterMembrane	Transport and binding proteins	NA	NA	NA	NA	GO:0006810 transport	GO:0004872 receptor activity GO:0005215 transporter activity	GO:0016020 membrane
δE	sll1206	CDS	ferric aerobactin receptor, FhuA homolog	OuterMembrane	Transport and binding proteins	NA	NA	NA	NA	GO:0006810 transport	GO:0004872 receptor activity GO:0005215 transporter activity	GO:0016020 membrane
δE	sll1270	5'UTR	periplasmic substrate-binding and integral membrane protein of the ABC-type Bgt permease for basic amino acids and glutamine BgtB	CytoplasmicMembrane	Transport and binding proteins	NA	NA	NA	NA	GO:0006810 transport	GO:0005215 transporter activity	GO:0016021 integral to membrane GO:0016020 membrane GO:0030288 outer membrane-bounded periplasmic space
δE	sll1270	CDS	periplasmic substrate-binding and integral membrane protein of the ABC-type Bgt permease for basic amino acids and glutamine BgtB	CytoplasmicMembrane	Transport and binding proteins	NA	NA	NA	NA	GO:0006810 transport	GO:0005215 transporter activity	GO:0016021 integral to membrane GO:0016020 membrane GO:0030288 outer membrane-bounded periplasmic space
δE	sll1319	CDS	uncharacterized transporter	CytoplasmicMembrane	Transport and binding proteins	NA	NA	NA	NA	transport [GO:0006810]	NA	integral component of membrane [GO:0016021]; plasma membrane [GO:0005886]
δE	sll1404	5'UTR	biopolymer transport ExbB protein homolog	CytoplasmicMembrane	Transport and binding proteins	NA	NA	NA	NA	GO:0006810 transport	GO:0008565 protein transporter activity	NA
δE	sll1404	CDS	biopolymer transport ExbB protein homolog	CytoplasmicMembrane	Transport and binding proteins	NA	NA	NA	NA	GO:0006810 transport	GO:0008565 protein transporter activity	NA
δE	sll1405	CDS	biopolymer transport ExbD protein homolog	CytoplasmicMembrane	Transport and binding proteins	NA	NA	NA	NA	GO:0006810 transport	GO:0005215 transporter activity	NA
δE	sll1406	CDS	ferrichrome-iron receptor	OuterMembrane	Transport and binding proteins	NA	NA	NA	NA	GO:0015891 siderophore transport GO:0006810 transport	GO:0005506 iron ion binding GO:0004872 receptor activity GO:0015343 siderophore-iron transmembrane transporter activity GO:0005215 transporter activity	NA
δE	sll1409	CDS	ferrichrome-iron receptor	OuterMembrane	Transport and binding proteins	NA	NA	NA	NA	GO:0015891 siderophore transport GO:0006810 transport	GO:0005506 iron ion binding GO:0004872 receptor activity GO:0015343 siderophore-iron transmembrane transporter activity GO:0005215 transporter activity	NA
δE	sll1428	5'UTR	probable sodium-dependent transporter	CytoplasmicMembrane	Transport and binding proteins	NA	NA	NA	NA	organic acid transmembrane transport [GO:1903825]	organic acid transmembrane transporter activity [GO:0005342]	integral component of plasma membrane [GO:0005887]
δE	sll1453	CDS	nitrate/nitrite transport system ATP-binding protein	CytoplasmicMembrane	Transport and binding proteins	NA	NA	NA	NA	GO:0015706 nitrate transport	GO:0005524 ATP binding GO:0016887 ATPase activity GO:0015112 nitrate transmembrane transporter activity GO:0017111 nucleoside-triphosphatase activity GO:0000166 nucleotide binding	NA
δE	sll1598	CDS	Mn transporter MntC	Periplasmic	Transport and binding proteins	Other	NA	NA	NA	GO:0007155 cell adhesion GO:0030001 metal ion transport	GO:0046872 metal ion binding	NA
δE	sll1599	CDS	manganese transport system ATP-binding protein MntA	CytoplasmicMembrane	Transport and binding proteins	NA	NA	NA	NA	NA	GO:0005524 ATP binding GO:0016887 ATPase activity GO:0017111 nucleoside-triphosphatase activity GO:0000166 nucleotide binding	NA
δE	sll1600	CDS	manganese transport system membrane protein MntB	CytoplasmicMembrane	Transport and binding proteins	NA	NA	NA	NA	GO:0006810 transport	GO:0005524 ATP binding GO:0042626 ATPase activity, coupled to transmembrane movement of substances	GO:0016020 membrane
δE/δJ	sll1708	5'UTR	two-component response regulator NarL subfamily	Cytoplasmic	Transport and binding proteins	NA	NA	NA	NA	phosphorelay signal transduction system [GO:0000160]; regulation of transcription, DNA-templated [GO:0006355]; transcription, DNA-templated [GO:0006351]	DNA binding [GO:0003677]	intracellular [GO:0005622]
δE	sll1708	CDS	two-component response regulator NarL subfamily	Cytoplasmic	Transport and binding proteins	NA	NA	NA	NA	phosphorelay signal transduction system [GO:0000160]; regulation of transcription, DNA-templated [GO:0006355]; transcription, DNA-templated [GO:0006351]	DNA binding [GO:0003677]	intracellular [GO:0005622]
δE	sll1872	CDS	ATP-binding protein of ABC transporter	CytoplasmicMembrane	Transport and binding proteins	NA	NA	NA	NA	methionine transport [GO:0015821]	ATPase activity, coupled to transmembrane movement of substances [GO:0042626]; ATP binding [GO:0005524]	plasma membrane [GO:0005886]
δE	sll1927	5'UTR	ABC transporter ATP-binding protein	CytoplasmicMembrane	Transport and binding proteins	NA	NA	NA	NA	peptide transport [GO:0015833]	ATPase activity [GO:0016887]; ATP binding [GO:0005524]	NA
δE	sll5044	CDS	unknown protein	Unknown	Transport and binding proteins	NA	NA	NA	NA	GO:0009103 lipopolysaccharide biosynthetic process	NA	NA
δE	sll5047	5'UTR	polysaccharide transmembrane transporter Wzy	CytoplasmicMembrane	Transport and binding proteins	NA	NA	NA	NA	NA	NA	integral component of membrane [GO:0016021]
δE	sll5047	CDS	polysaccharide transmembrane transporter Wzy	CytoplasmicMembrane	Transport and binding proteins	NA	NA	NA	NA	NA	NA	integral component of membrane [GO:0016021]
δE	sll5049	5'UTR	polysaccharide transmembrane transporter Wzx, flippase	CytoplasmicMembrane	Transport and binding proteins	NA	NA	NA	NA	transport [GO:0006810]	NA	integral component of membrane [GO:0016021]; plasma membrane [GO:0005886]
δE	sll5049	CDS	polysaccharide transmembrane transporter Wzx, flippase	CytoplasmicMembrane	Transport and binding proteins	NA	NA	NA	NA	transport [GO:0006810]	NA	integral component of membrane [GO:0016021]; plasma membrane [GO:0005886]
δE	sll5052	5'UTR	similar to exopolysaccharide export protein	CytoplasmicMembrane	Transport and binding proteins	Other	NA	NA	NA	NA	NA	NA
δE	sll5052	CDS	similar to exopolysaccharide export protein	CytoplasmicMembrane	Transport and binding proteins	Other	NA	NA	NA	NA	NA	NA
δE	sll5057	5'UTR	probable glycosyltransferase	CytoplasmicMembrane	Transport and binding proteins	Other	NA	NA	NA	NA	NA	NA
δE	sll5057	CDS	probable glycosyltransferase	CytoplasmicMembrane	Transport and binding proteins	Other	NA	NA	NA	NA	NA	NA
δJ	slr0074	5'UTR	ABC transporter subunit	Unknown	Transport and binding proteins	NA	NA	NA	NA	iron-sulfur cluster assembly [GO:0016226]	NA	NA
δJ	slr0074	CDS	ABC transporter subunit	Unknown	Transport and binding proteins	NA	NA	NA	NA	iron-sulfur cluster assembly [GO:0016226]	NA	NA
δE	slr0096	5'UTR	low affinity sulfate transporter	CytoplasmicMembrane	Transport and binding proteins	NA	NA	NA	NA	GO:0055085 transmembrane transport GO:0006810 transport	GO:0005215 transporter activity	GO:0016021 integral to membrane
δJ	slr0096	CDS	low affinity sulfate transporter	CytoplasmicMembrane	Transport and binding proteins	NA	NA	NA	NA	GO:0055085 transmembrane transport GO:0006810 transport	GO:0005215 transporter activity	GO:0016021 integral to membrane
δE	slr0415	5'UTR	Na+/H+ antiporter	CytoplasmicMembrane	Transport and binding proteins	NA	NA	NA	NA	hydrogen ion transmembrane transport [GO:1902600]; regulation of pH [GO:0006885]; response to stress [GO:0006950]; sodium ion transport [GO:0006814]	monovalent cation:proton antiporter activity [GO:0005451]	integral component of membrane [GO:0016021]
δE	slr0447	5'UTR	periplasmic protein, ABC-type urea transport system substrate-binding protein	Cytoplasmic	Transport and binding proteins	NA	NA	NA	NA	GO:0006865 amino acid transport	NA	NA
δE	slr0447	CDS	periplasmic protein, ABC-type urea transport system substrate-binding protein	Cytoplasmic	Transport and binding proteins	NA	NA	NA	NA	GO:0006865 amino acid transport	NA	NA
δE	slr0447	3'UTR	periplasmic protein, ABC-type urea transport system substrate-binding protein	Cytoplasmic	Transport and binding proteins	NA	NA	NA	NA	GO:0006865 amino acid transport	NA	NA
δE	slr0529	CDS	glucosylglycerol transport system substrate-binding protein	Unknown	Transport and binding proteins	NA	NA	NA	NA	NA	transporter activity [GO:0005215]	NA
δE	slr0728	5'UTR	polysaccharide transmembrane transporter Wzy	CytoplasmicMembrane	Transport and binding proteins	NA	NA	NA	NA	NA	NA	integral component of membrane [GO:0016021]
δE	slr0728	CDS	polysaccharide transmembrane transporter Wzy	CytoplasmicMembrane	Transport and binding proteins	NA	NA	NA	NA	NA	NA	integral component of membrane [GO:0016021]
δE	slr0747	5'UTR	glucosylglycerol transport system ATP-binding protein	CytoplasmicMembrane	Transport and binding proteins	NA	NA	NA	NA	GO:0006810 transport	GO:0005524 ATP binding GO:0016887 ATPase activity GO:0016820 hydrolase activity, acting on acid anhydrides, catalyzing transmembrane movement of substances GO:0000166 nucleotide binding GO:0005215 transporter activity GO:0017111 nucleoside-triphosphatase activity	NA
δE	slr0747	3'UTR	glucosylglycerol transport system ATP-binding protein	CytoplasmicMembrane	Transport and binding proteins	NA	NA	NA	NA	GO:0006810 transport	GO:0005524 ATP binding GO:0016887 ATPase activity GO:0016820 hydrolase activity, acting on acid anhydrides, catalyzing transmembrane movement of substances GO:0000166 nucleotide binding GO:0005215 transporter activity GO:0017111 nucleoside-triphosphatase activity	NA
δE	slr0747	CDS	glucosylglycerol transport system ATP-binding protein	CytoplasmicMembrane	Transport and binding proteins	NA	NA	NA	NA	GO:0006810 transport	GO:0005524 ATP binding GO:0016887 ATPase activity GO:0016820 hydrolase activity, acting on acid anhydrides, catalyzing transmembrane movement of substances GO:0000166 nucleotide binding GO:0005215 transporter activity GO:0017111 nucleoside-triphosphatase activity	NA
δJ	slr0753	CDS	probable transport protein	CytoplasmicMembrane	Transport and binding proteins	NA	NA	NA	NA	anion transmembrane transport [GO:0098656]; arsenite transport [GO:0015700]	arsenite transmembrane transporter activity [GO:0015105]; transporter activity [GO:0005215]	NA
δE	slr0793	CDS	cation efflux system protein involved in nickel and cobalt tolerance	Unknown	Transport and binding proteins	NA	NA	NA	NA	metal ion transport [GO:0030001]	metal ion transmembrane transporter activity [GO:0046873]; transition metal ion binding [GO:0046914]	integral component of membrane [GO:0016021]; outer membrane-bounded periplasmic space [GO:0030288]
δE	slr0794	CDS	cation efflux system protein involved in nickel and cobalt tolerance	CytoplasmicMembrane	Transport and binding proteins	NA	NA	NA	NA	NA	cation transmembrane transporter activity [GO:0008324]	integral component of membrane [GO:0016021]
δE	slr0795	5'UTR	cation efflux system protein involved in nickel and cobalt tolerance	CytoplasmicMembrane	Transport and binding proteins	NA	3.2.1.17	CATALYTIC ACTIVITY: Hydrolysis of (1->4)-beta-linkages between N-acetylmuramic acid and N-acetyl-D-glucosamine residues in a peptidoglycan and between N-acetyl-D-glucosamine residues in chitodextrins. {ECO:0000256|RuleBase:RU003788}.	NA	cell wall macromolecule catabolic process [GO:0016998]; cytolysis [GO:0019835]; defense response to bacterium [GO:0042742]; peptidoglycan catabolic process [GO:0009253]	lysozyme activity [GO:0003796]	integral component of membrane [GO:0016021]
δE	slr0795	CDS	cation efflux system protein involved in nickel and cobalt tolerance	CytoplasmicMembrane	Transport and binding proteins	NA	3.2.1.17	CATALYTIC ACTIVITY: Hydrolysis of (1->4)-beta-linkages between N-acetylmuramic acid and N-acetyl-D-glucosamine residues in a peptidoglycan and between N-acetyl-D-glucosamine residues in chitodextrins. {ECO:0000256|RuleBase:RU003788}.	NA	cell wall macromolecule catabolic process [GO:0016998]; cytolysis [GO:0019835]; defense response to bacterium [GO:0042742]; peptidoglycan catabolic process [GO:0009253]	lysozyme activity [GO:0003796]	integral component of membrane [GO:0016021]
δE	slr0798	CDS	zinc-transporting P-type ATPase (zinc efflux pump) involved in zinc tolerance	CytoplasmicMembrane	Transport and binding proteins	NA	3.6.3.5	CATALYTIC ACTIVITY: ATP + H(2)O + Zn(2+)(In) = ADP + phosphate + Zn(2+)(Out).	NA	cadmium ion transmembrane transport [GO:0070574]; cation transmembrane transport [GO:0098655]; zinc II ion transmembrane transport [GO:0071577]	ATP binding [GO:0005524]; cadmium ion transmembrane transporter activity [GO:0015086]; cation-transporting ATPase activity [GO:0019829]; metal ion binding [GO:0046872]; zinc-exporting ATPase activity [GO:0016463]; zinc ion transmembrane transporter activity [GO:0005385]	integral component of plasma membrane [GO:0005887]; intracellular membrane-bounded organelle [GO:0043231]
δE	slr0817	3'UTR	salicylate biosynthesis isochorismate synthase	Cytoplasmic	Transport and binding proteins	NA	NA	NA	NA	GO:0009058 biosynthetic process	GO:0008909 isochorismate synthase activity	NA
δE	slr0817	CDS	salicylate biosynthesis isochorismate synthase	Cytoplasmic	Transport and binding proteins	NA	NA	NA	NA	GO:0009058 biosynthetic process	GO:0008909 isochorismate synthase activity	NA
δE	slr0822	5'UTR	cation-transporting P-type ATPase PacL	CytoplasmicMembrane	Transport and binding proteins	NA	NA	NA	NA	cation transmembrane transport [GO:0098655]	ATP binding [GO:0005524]; cation-transporting ATPase activity [GO:0019829]; metal ion binding [GO:0046872]	integral component of plasma membrane [GO:0005887]; intracellular membrane-bounded organelle [GO:0043231]
δJ	slr0875	CDS	large-conductance mechanosensitive channel	CytoplasmicMembrane	Transport and binding proteins	NA	NA	NA	NA	cellular water homeostasis [GO:0009992]; ion transmembrane transport [GO:0034220]; ion transport [GO:0006811]	mechanically-gated ion channel activity [GO:0008381]	integral component of membrane [GO:0016021]; plasma membrane [GO:0005886]
δE	slr0923	CDS	polysaccharide transmembrane transporter Wzc/Wzz/KpsE	Unknown	Transport and binding proteins	NA	NA	NA	NA	translation [GO:0006412]	structural constituent of ribosome [GO:0003735]	ribosome [GO:0005840]
δE	slr0944	CDS	multidrug-efflux transporter	CytoplasmicMembrane	Transport and binding proteins	NA	NA	NA	NA	GO:0006814 sodium ion transport	GO:0008508 bile	GO:0016021 integral to membrane GO:0016020 membrane
δJ	slr0964	3'UTR	high-affinity iron permease complex	CytoplasmicMembrane	Transport and binding proteins	NA	NA	NA	NA	high-affinity iron ion transmembrane transport [GO:0006827]	iron ion transmembrane transporter activity [GO:0005381]	high-affinity iron permease complex [GO:0033573]; integral component of membrane [GO:0016021]
δE	slr1045	CDS	probable ABC transporter permease protein	CytoplasmicMembrane	Transport and binding proteins	NA	NA	NA	NA	phospholipid transport [GO:0015914]	phospholipid binding [GO:0005543]; phospholipid transporter activity [GO:0005548]	NA
δE	slr1046	CDS	putative TatA protein	CytoplasmicMembrane	Transport and binding proteins	Protein and peptide secretion	NA	NA	NA	protein secretion [GO:0009306]; protein transport by the Tat complex [GO:0043953]	protein transmembrane transporter activity [GO:0008320]	NA
δE	slr1113	CDS	ATP-binding protein of ABC transporter	CytoplasmicMembrane	Transport and binding proteins	NA	NA	NA	NA	NA	ATPase activity [GO:0016887]; ATP binding [GO:0005524]	NA
δE	slr1200	5'UTR	urea transport system permease protein	CytoplasmicMembrane	Transport and binding proteins	NA	NA	NA	NA	NA	NA	NA
δE	slr1200	CDS	urea transport system permease protein	CytoplasmicMembrane	Transport and binding proteins	NA	NA	NA	NA	NA	NA	NA
δE	slr1229	CDS	sulfate permease	CytoplasmicMembrane	Transport and binding proteins	NA	NA	NA	NA	sulfate transmembrane transport [GO:1902358]	secondary active sulfate transmembrane transporter activity [GO:0008271]; sulfate transmembrane transporter activity [GO:0015116]	integral component of plasma membrane [GO:0005887]
δE	slr1250	3'UTR	phosphate transport ATP-binding protein PstB homolog	CytoplasmicMembrane	Transport and binding proteins	NA	3.6.3.27	CATALYTIC ACTIVITY: ATP + H(2)O + phosphate(Out) = ADP + phosphate + phosphate(In). {ECO:0000255|HAMAP-Rule:MF_01702}.	NA	NA	ATP binding [GO:0005524]; inorganic phosphate transmembrane transporter activity [GO:0005315]; phosphate ion transmembrane-transporting ATPase activity [GO:0015415]	ATP-binding cassette (ABC) transporter complex [GO:0043190]
δE	slr1316	5'UTR	ABC-type iron(III) dicitrate transport system permease protein	CytoplasmicMembrane	Transport and binding proteins	NA	NA	NA	NA	NA	NA	NA
δE	slr1316	CDS	ABC-type iron(III) dicitrate transport system permease protein	CytoplasmicMembrane	Transport and binding proteins	NA	NA	NA	NA	NA	NA	NA
δE	slr1317	CDS	ABC-type iron(III) dicitrate transport system permease protein	CytoplasmicMembrane	Transport and binding proteins	NA	NA	NA	NA	NA	NA	NA
δE	slr1319	3'UTR	iron(III) dicitrate transport system substrate-binding protein	Periplasmic	Transport and binding proteins	NA	NA	NA	NA	NA	NA	NA
δE	slr1319	CDS	iron(III) dicitrate transport system substrate-binding protein	Periplasmic	Transport and binding proteins	NA	NA	NA	NA	NA	NA	NA
δE	slr1329	3'UTR	nitrate/nitrite transport system ATP-binding protein	CytoplasmicMembrane	Transport and binding proteins	NA	NA	NA	NA	nitrate assimilation [GO:0042128]	ATPase activity [GO:0016887]; ATP binding [GO:0005524]; nitrate transmembrane transporter activity [GO:0015112]	plasma membrane [GO:0005886]
δE	slr1392	3'UTR	ferrous iron transport protein B	CytoplasmicMembrane	Transport and binding proteins	NA	NA	NA	NA	iron ion homeostasis [GO:0055072]	ferrous iron transmembrane transporter activity [GO:0015093]; GTP binding [GO:0005525]	integral component of membrane [GO:0016021]; plasma membrane [GO:0005886]
δE	slr1392	CDS	ferrous iron transport protein B	CytoplasmicMembrane	Transport and binding proteins	NA	NA	NA	NA	iron ion homeostasis [GO:0055072]	ferrous iron transmembrane transporter activity [GO:0015093]; GTP binding [GO:0005525]	integral component of membrane [GO:0016021]; plasma membrane [GO:0005886]
δE	slr1452	CDS	sulfate transport system substrate-binding protein	Unknown	Transport and binding proteins	NA	NA	NA	NA	GO:0008271 secondary active sulfate transmembrane transporter activity GO:0015419 sulfate transmembrane-transporting ATPase activity GO:0005215 transporter activity	GO:0030288 outer membrane-bounded periplasmic space	NA
δE	slr1453	CDS	sulfate transport system permease protein	CytoplasmicMembrane	Transport and binding proteins	NA	NA	NA	NA	GO:0008272 sulfate transport GO:0006810 transport	GO:0015116 sulfate transmembrane transporter activity GO:0005215 transporter activity GO:0015563 uptake transmembrane transporter activity	GO:0016021 integral to membrane GO:0016020 membrane
δE	slr1454	CDS	sulfate transport system permease protein	CytoplasmicMembrane	Transport and binding proteins	NA	NA	NA	NA	NA	sulfate transmembrane-transporting ATPase activity [GO:0015419]	integral component of membrane [GO:0016021]; plasma membrane [GO:0005886]
δE	slr1455	CDS	sulfate transport system ATP-binding protein	CytoplasmicMembrane	Transport and binding proteins	NA	3.6.3.25	CATALYTIC ACTIVITY: ATP + H(2)O + sulfate(Out) = ADP + phosphate + sulfate(In). {ECO:0000255|HAMAP-Rule:MF_01701}.	NA	NA	ATP binding [GO:0005524]; sulfate transmembrane-transporting ATPase activity [GO:0015419]	ATP-binding cassette (ABC) transporter complex [GO:0043190]
δE	slr1457	CDS	chromate transport protein	CytoplasmicMembrane	Transport and binding proteins	NA	NA	NA	NA	GO:0015703 chromate transport	GO:0015109 chromate transmembrane transporter activity	NA
δE	slr1488	CDS	multidrug resistance family ABC transporter	CytoplasmicMembrane	Transport and binding proteins	NA	NA	NA	NA	NA	ATPase activity, coupled to transmembrane movement of substances [GO:0042626]; ATP binding [GO:0005524]	integral component of membrane [GO:0016021]
δE	slr1490	CDS	ferrichrome-iron receptor	OuterMembrane	Transport and binding proteins	NA	NA	NA	NA	GO:0015891 siderophore transport GO:0006810 transport	GO:0005506 iron ion binding GO:0004872 receptor activity GO:0015343 siderophore-iron transmembrane transporter activity GO:0005215 transporter activity	GO:0016020 membrane
δE	slr1491	CDS	iron(III) dicitrate transport system substrate-binding protein	Unknown	Transport and binding proteins	NA	NA	NA	NA	GO:0006827 high-affinity iron ion transport	GO:0005381 iron ion transmembrane transporter activity	NA
δE	slr1492	CDS	iron(III) dicitrate transport system substrate-binding protein	Periplasmic	Transport and binding proteins	NA	NA	NA	NA	GO:0006827 high-affinity iron ion transport	GO:0005381 iron ion transmembrane transporter activity	NA
δE	slr1494	CDS	MDR (multidrug resistance) family ABC transporter	CytoplasmicMembrane	Transport and binding proteins	NA	NA	NA	NA	GO:0055085 transmembrane transport GO:0006810 transport	GO:0005524 ATP binding GO:0016887 ATPase activity GO:0042626 ATPase activity, coupled to transmembrane movement of substances GO:0017111 nucleoside-triphosphatase activity GO:0000166 nucleotide binding	GO:0016021 integral to membrane
δE	slr1506	CDS	ATP-binding protein of ABC transporter	CytoplasmicMembrane	Transport and binding proteins	NA	NA	NA	NA	transmembrane transport [GO:0055085]	ATPase activity [GO:0016887]; ATP binding [GO:0005524]	ATP-binding cassette (ABC) transporter complex [GO:0043190]
δE	slr1575	CDS	probable potassium efflux system	CytoplasmicMembrane	Transport and binding proteins	NA	NA	NA	NA	transmembrane transport [GO:0055085]	NA	integral component of membrane [GO:0016021]
δE	slr1575	5'UTR	probable potassium efflux system	CytoplasmicMembrane	Transport and binding proteins	NA	NA	NA	NA	transmembrane transport [GO:0055085]	NA	integral component of membrane [GO:0016021]
δE	slr1596	5'UTR	a protein in the cytoplasmic membrane involved in light-induced proton extrusion.	CytoplasmicMembrane	Transport and binding proteins	NA	NA	NA	NA	NA	hydrogen ion transmembrane transporter activity [GO:0015078]	integral component of membrane [GO:0016021]; plasma membrane [GO:0005886]
δE	slr1647	CDS	putative membrane transporter protein	CytoplasmicMembrane	Transport and binding proteins	NA	NA	NA	NA	cellular iron ion homeostasis [GO:0006879]; ion transmembrane transport [GO:0034220]	ion transmembrane transporter activity [GO:0015075]	integral component of plasma membrane [GO:0005887]
δE	slr1723	3'UTR	permease protein of sugar ABC transporter	CytoplasmicMembrane	Transport and binding proteins	NA	NA	NA	NA	NA	NA	NA
δE	slr1727	5'UTR	Na+/H+ antiporter	CytoplasmicMembrane	Transport and binding proteins	NA	NA	NA	NA	sodium ion transport [GO:0006814]	solute:proton antiporter activity [GO:0015299]	integral component of membrane [GO:0016021]; plasma membrane [GO:0005886]
δE	slr1728	CDS	potassium-transporting P-type ATPase A chain	CytoplasmicMembrane	Transport and binding proteins	NA	NA	NA	NA	GO:0006813 potassium ion transport	GO:0008556 potassium-transporting ATPase activity	GO:0016020 membrane
δE	slr1728	5'UTR	potassium-transporting P-type ATPase A chain	CytoplasmicMembrane	Transport and binding proteins	NA	NA	NA	NA	potassium ion transmembrane transport [GO:0071805]	potassium ion binding [GO:0030955]; potassium-transporting ATPase activity [GO:0008556]	integral component of plasma membrane [GO:0005887]; plasma membrane [GO:0005886]
δE	slr1729	CDS	potassium-transporting P-type ATPase B chain	CytoplasmicMembrane	Transport and binding proteins	NA	3.6.3.12	CATALYTIC ACTIVITY: ATP + H(2)O + K(+)(Out) = ADP + phosphate + K(+)(In). {ECO:0000255|HAMAP-Rule:MF_00285}.	NA	potassium ion transmembrane transport [GO:0071805]	ATP binding [GO:0005524]; magnesium ion binding [GO:0000287]; potassium-transporting ATPase activity [GO:0008556]	integral component of plasma membrane [GO:0005887]; intracellular membrane-bounded organelle [GO:0043231]
δE	slr1730	CDS	potassium-transporting P-type ATPase C chain	CytoplasmicMembrane	Transport and binding proteins	NA	NA	NA	NA	GO:0006813 potassium ion transport	GO:0008556 potassium-transporting ATPase activity	GO:0016020 membrane
δE	slr1731	CDS	potassium-transporting P-type ATPase D chain	CytoplasmicMembrane	Transport and binding proteins	NA	2.7.3.-	NA	NA	NA	phosphorelay sensor kinase activity [GO:0000155]	intracellular [GO:0005622]; membrane [GO:0016020]
δE	slr1881	CDS	ATP-binding subunit of the ABC-type Nat permease for neutral amino acids	CytoplasmicMembrane	Transport and binding proteins	NA	NA	NA	NA	NA	GO:0005524 ATP binding GO:0016887 ATPase activity GO:0017111 nucleoside-triphosphatase activity GO:0000166 nucleotide binding	NA
δE	slr1897	5'UTR	periplasmic sugar-binding protein of ABC transporter	CytoplasmicMembrane	Transport and binding proteins	NA	NA	NA	NA	NA	NA	NA
δE	slr1901	CDS	ATP-binding protein of ABC transporter	Cytoplasmic	Transport and binding proteins	NA	NA	NA	NA	NA	ATPase activity [GO:0016887]; ATP binding [GO:0005524]	NA
δE	slr1901	3'UTR	ATP-binding protein of ABC transporter	Cytoplasmic	Transport and binding proteins	NA	NA	NA	NA	NA	ATPase activity [GO:0016887]; ATP binding [GO:0005524]	NA
δJ	slr1950	5'UTR	copper-transporting P-type ATPase CtaA	CytoplasmicMembrane	Transport and binding proteins	NA	NA	NA	NA	copper ion import [GO:0015677]; copper ion transmembrane transport [GO:0035434]	copper-transporting ATPase activity [GO:0043682]; metal ion binding [GO:0046872]; nucleotide binding [GO:0000166]	integral component of plasma membrane [GO:0005887]; intracellular membrane-bounded organelle [GO:0043231]
δE	slr1978	5'UTR	pilI twitching motility protein PilI	CytoplasmicMembrane	Transport and binding proteins	NA	NA	NA	NA	NA	NA	integral component of membrane [GO:0016021]
δE	slr2019	3'UTR	ATP-binding protein of ABC transporter	CytoplasmicMembrane	Transport and binding proteins	NA	NA	NA	NA	lipid transport [GO:0006869]	ATP binding [GO:0005524]; lipid-transporting ATPase activity [GO:0034040]	integral component of membrane [GO:0016021]
δE	slr2043	CDS	zinc transport system substrate-binding protein	Periplasmic	Transport and binding proteins	NA	NA	NA	NA	NA	NA	NA
δE	slr2043	5'UTR	zinc transport system substrate-binding protein	Periplasmic	Transport and binding proteins	NA	NA	NA	NA	NA	NA	NA
δE	slr2044	CDS	zinc transport system ATP-binding protein	Cytoplasmic	Transport and binding proteins	NA	NA	NA	NA	NA	ATPase activity [GO:0016887]; ATP binding [GO:0005524]	NA
δE	slr2045	CDS	zinc transport system permease protein	CytoplasmicMembrane	Transport and binding proteins	NA	NA	NA	NA	response to zinc ion [GO:0010043]	ATPase activity, coupled to transmembrane movement of substances [GO:0042626]; ATP binding [GO:0005524]	integral component of membrane [GO:0016021]; plasma membrane [GO:0005886]
δE	slr2057	CDS	water channel protein	CytoplasmicMembrane	Transport and binding proteins	NA	NA	NA	NA	GO:0055085 transmembrane transport GO:0006810 transport	GO:0005215 transporter activity	GO:0016021 integral to membrane GO:0016020 membrane
δE	slr2077	CDS	probable ABC transporter, periplasmic binding protein	CytoplasmicMembrane	Transport and binding proteins	NA	NA	NA	NA	GO:0006810 transport	GO:0005215 transporter activity	GO:0016020 membrane GO:0030288 outer membrane-bounded periplasmic space
δE	slr2077	5'UTR	probable ABC transporter, periplasmic binding protein	CytoplasmicMembrane	Transport and binding proteins	NA	NA	NA	NA	GO:0006810 transport	GO:0005215 transporter activity	GO:0016020 membrane GO:0030288 outer membrane-bounded periplasmic space
δE	slr2107	CDS	probable polysaccharide ABC transporter permease protein	CytoplasmicMembrane	Transport and binding proteins	NA	NA	NA	NA	NA	NA	NA
δE	slr2107	3'UTR	probable polysaccharide ABC transporter permease protein	CytoplasmicMembrane	Transport and binding proteins	NA	NA	NA	NA	NA	NA	NA
δE	slr2131	5'UTR	RND multidrug efflux transporter	CytoplasmicMembrane	Transport and binding proteins	NA	NA	NA	NA	NA	transporter activity [GO:0005215]	integral component of membrane [GO:0016021]
δE	slr5038	CDS	chromate transporter	CytoplasmicMembrane	Transport and binding proteins	NA	NA	NA	NA	NA	chromate transmembrane transporter activity [GO:0015109]	integral component of membrane [GO:0016021]
δE	slr6042	CDS	probable cation efflux system protein, czcB homolog	Unknown	Transport and binding proteins	NA	NA	NA	NA	cellular copper ion homeostasis [GO:0006878]; copper ion export [GO:0060003]; detoxification of copper ion [GO:0010273]; plasma membrane copper ion transport [GO:0015679]	copper ion binding [GO:0005507]; copper ion transmembrane transporter activity [GO:0005375]	integral component of membrane [GO:0016021]; outer membrane-bounded periplasmic space [GO:0030288]
δE	slr6042	5'UTR	probable cation efflux system protein, czcB homolog	Unknown	Transport and binding proteins	NA	NA	NA	NA	cellular copper ion homeostasis [GO:0006878]; copper ion export [GO:0060003]; detoxification of copper ion [GO:0010273]; plasma membrane copper ion transport [GO:0015679]	copper ion binding [GO:0005507]; copper ion transmembrane transporter activity [GO:0005375]	integral component of membrane [GO:0016021]; outer membrane-bounded periplasmic space [GO:0030288]
δE	ssl3127	CDS	similar to permease protein of ABC transporter	CytoplasmicMembrane	Transport and binding proteins	NA	NA	NA	NA	GO:0006810 transport	GO:0005215 transporter activity	GO:0016020 membrane
δE	sll0008	3'UTR	unknown protein	Unknown	Unknown	NA	NA	NA	NA	NA	NA	NA
δE	sll0066	CDS	unknown protein	CytoplasmicMembrane	Unknown	NA	NA	NA	NA	NA	NA	integral component of membrane [GO:0016021]
δE	sll0085	CDS	unknown protein	CytoplasmicMembrane	Unknown	NA	NA	NA	NA	NA	NA	NA
δE	sll0156	CDS	unknown protein	Periplasmic	Unknown	NA	NA	NA	NA	NA	NA	NA
δE	sll0236	5'UTR	unknown protein	Cytoplasmic	Unknown	NA	NA	NA	NA	NA	metallocarboxypeptidase activity [GO:0004181]; zinc ion binding [GO:0008270]	extracellular space [GO:0005615]
δE	sll0243	3'UTR	unknown protein	Unknown	Unknown	NA	NA	NA	NA	NA	NA	NA
δE	sll0252	5'UTR	unknown protein	Extracellular	Unknown	NA	NA	NA	NA	sporulation resulting in formation of a cellular spore [GO:0030435]	NA	NA
δE	sll0321	5'UTR	unknown protein	Cytoplasmic	Unknown	NA	NA	NA	NA	NA	oxidoreductase activity [GO:0016491]	NA
δE	sll0376	3'UTR	unknown protein	CytoplasmicMembrane	Unknown	NA	NA	NA	NA	NA	NA	integral component of membrane [GO:0016021]
δE	sll0406	3'UTR	unknown protein	Unknown	Unknown	NA	NA	NA	NA	NA	NA	NA
δJ	sll0444	CDS	unknown protein	CytoplasmicMembrane	Unknown	NA	NA	NA	NA	NA	NA	integral component of membrane [GO:0016021]
δE	sll0478	CDS	unknown protein	Cytoplasmic	Unknown	NA	NA	NA	NA	protein transport [GO:0015031]	transporter activity [GO:0005215]	integral component of membrane [GO:0016021]; plasma membrane [GO:0005886]
δE	sll0479	CDS	unknown protein	Unknown	Unknown	NA	NA	NA	NA	protein transport [GO:0015031]	transporter activity [GO:0005215]	integral component of membrane [GO:0016021]; plasma membrane [GO:0005886]
δE	sll0508	CDS	unknown protein	Unknown	Unknown	NA	NA	NA	NA	NA	NA	NA
δE	sll0547	3'UTR	unknown protein	Cytoplasmic	Unknown	NA	NA	NA	NA	NA	NA	NA
δE	sll0595	CDS	unknown protein	Unknown	Unknown	NA	NA	NA	NA	NA	NA	NA
δE	sll0608	CDS	hypothetical protein YCF49	CytoplasmicMembrane	Unknown	NA	NA	NA	NA	NA	NA	NA
δE	sll0624	5'UTR	unknown protein	Cytoplasmic	Unknown	NA	NA	NA	NA	NA	NA	NA
δE	sll0624	CDS	unknown protein	Cytoplasmic	Unknown	NA	NA	NA	NA	NA	NA	NA
δE	sll0647	CDS	unknown protein	Cytoplasmic	Unknown	NA	NA	NA	NA	tRNA 3'-trailer cleavage, endonucleolytic [GO:0034414]	3'-tRNA processing endoribonuclease activity [GO:0042781]	NA
δE	sll0656	CDS	unknown protein	Unknown	Unknown	NA	NA	NA	NA	NA	NA	NA
δE	sll0664	5'UTR	unknown protein	Cytoplasmic	Unknown	NA	NA	NA	NA	NA	NA	NA
δE	sll0688	CDS	unknown protein	CytoplasmicMembrane	Unknown	NA	NA	NA	NA	NA	NA	integral component of membrane [GO:0016021]; plasma membrane [GO:0005886]
δE	sll0710	CDS	unknown protein	Unknown	Unknown	NA	NA	NA	NA	NA	NA	NA
δE	sll0721	5'UTR	unknown protein	Extracellular	Unknown	NA	NA	NA	NA	NA	calcium ion binding [GO:0005509]	NA
δE	sll0721	CDS	unknown protein	Extracellular	Unknown	NA	NA	NA	NA	NA	calcium ion binding [GO:0005509]	NA
δE	sll0722	5'UTR	unknown protein	Cytoplasmic	Unknown	NA	NA	NA	NA	NA	NA	NA
δE	sll0722	3'UTR	unknown protein	Cytoplasmic	Unknown	NA	NA	NA	NA	NA	NA	NA
δE	sll0722	CDS	unknown protein	Cytoplasmic	Unknown	NA	NA	NA	NA	NA	NA	NA
δE	sll0733	5'UTR	unknown protein	CytoplasmicMembrane	Unknown	NA	NA	NA	NA	NA	NA	integral component of membrane [GO:0016021]
δE	sll0843	3'UTR	unknown protein	Unknown	Unknown	NA	NA	NA	NA	NA	hydrolase activity, acting on ester bonds [GO:0016788]	NA
δE	sll0943	5'UTR	unknown protein	Unknown	Unknown	NA	NA	NA	NA	NA	NA	NA
δE	sll1002	CDS	hypothetical protein YCF22	Unknown	Unknown	NA	NA	NA	NA	NA	NA	NA
δE/δJ	sll1009	5'UTR	unknown protein	Extracellular	Unknown	NA	NA	NA	NA	NA	NA	NA
δE/δJ	sll1009	3'UTR	unknown protein	Extracellular	Unknown	NA	NA	NA	NA	NA	NA	NA
δE/δJ	sll1009	CDS	unknown protein	Extracellular	Unknown	NA	NA	NA	NA	NA	NA	NA
δE	sll1037	CDS	unknown protein	Unknown	Unknown	NA	NA	NA	NA	NA	NA	NA
δE	sll1061	CDS	unknown protein	Cytoplasmic	Unknown	NA	NA	NA	NA	NA	NA	NA
δE	sll1062	3'UTR	unknown protein	Unknown	Unknown	NA	NA	NA	NA	NA	NA	NA
δE	sll1062	CDS	unknown protein	Unknown	Unknown	NA	NA	NA	NA	NA	NA	NA
δJ	sll1086	3'UTR	unknown protein	Unknown	Unknown	NA	NA	NA	NA	NA	NA	NA
δE	sll1086	3'UTR	unknown protein	Unknown	Unknown	NA	NA	NA	NA	NA	NA	NA
δE/δJ	sll1086	CDS	unknown protein	Unknown	Unknown	NA	NA	NA	NA	NA	NA	NA
δE	sll1167	5'UTR	unknown protein	CytoplasmicMembrane	Unknown	NA	NA	NA	NA	NA	NA	NA
δE	sll1167	CDS	unknown protein	CytoplasmicMembrane	Unknown	NA	NA	NA	NA	NA	NA	NA
δE	sll1170	CDS	unknown protein	CytoplasmicMembrane	Unknown	NA	NA	NA	NA	NA	NA	NA
δE	sll1174	CDS	unknown protein	Unknown	Unknown	NA	NA	NA	NA	NA	NA	NA
δE	sll1217	5'UTR	unknown protein	Cytoplasmic	Unknown	NA	NA	NA	NA	NA	NA	NA
δE	sll1236	3'UTR	unknown protein	Unknown	Unknown	NA	NA	NA	NA	NA	NA	NA
δE	sll1236	CDS	unknown protein	Unknown	Unknown	NA	NA	NA	NA	NA	NA	NA
δE	sll1338	5'UTR	unknown protein	Unknown	Unknown	NA	NA	NA	NA	NA	NA	NA
δE	sll1338	CDS	unknown protein	Unknown	Unknown	NA	NA	NA	NA	NA	NA	NA
δE	sll1338	CDS	unknown protein	Unknown	Unknown	NA	NA	NA	NA	NA	NA	NA
δE	sll1396	CDS	unknown protein	Unknown	Unknown	NA	NA	NA	NA	NA	NA	NA
δE	sll1401	3'UTR	unknown protein	Cytoplasmic	Unknown	NA	NA	NA	NA	NA	NA	NA
δE	sll1401	CDS	unknown protein	Cytoplasmic	Unknown	NA	NA	NA	NA	NA	NA	NA
δE	sll1456	5'UTR	unknown protein	Cytoplasmic	Unknown	NA	NA	NA	NA	NA	NA	NA
δE	sll1472	CDS	unknown protein	Unknown	Unknown	NA	NA	NA	NA	NA	NA	NA
δE	sll1476	CDS	unknown protein	Cytoplasmic	Unknown	NA	NA	NA	NA	NA	NA	NA
δE	sll1515	3'UTR	glutamine synthetase inactivating factor IF17	Unknown	Unknown	NA	NA	NA	NA	NA	NA	NA
δE	sll1515	5'UTR	glutamine synthetase inactivating factor IF17	Unknown	Unknown	NA	NA	NA	NA	NA	NA	NA
δE	sll1515	CDS	glutamine synthetase inactivating factor IF17	Unknown	Unknown	NA	NA	NA	NA	NA	NA	NA
δE	sll1630	CDS	unknown protein	Cytoplasmic	Unknown	NA	NA	NA	NA	NA	NA	NA
δE	sll1665	3'UTR	unknown protein	Unknown	Unknown	NA	NA	NA	NA	NA	NA	NA
δE	sll1665	CDS	unknown protein	Unknown	Unknown	NA	NA	NA	NA	NA	NA	NA
δE	sll1687	5'UTR	unknown protein	Cytoplasmic	Unknown	NA	NA	NA	NA	NA	phosphorelay sensor kinase activity [GO:0000155]	intracellular [GO:0005622]
δE	sll1717	CDS	unknown protein	Cytoplasmic	Unknown	NA	NA	NA	NA	NA	NA	NA
δE	sll1739	3'UTR	unknown protein	Cytoplasmic	Unknown	NA	NA	NA	NA	NA	NA	NA
δJ	sll1830	3'UTR	unknown protein	Cytoplasmic	Unknown	NA	NA	NA	NA	NA	NA	NA
δJ	sll1830	CDS	unknown protein	Cytoplasmic	Unknown	NA	NA	NA	NA	NA	NA	NA
δE	sll1837	5'UTR	periplasmic protein, function unknown	Unknown	Unknown	NA	NA	NA	NA	NA	NA	outer membrane-bounded periplasmic space [GO:0030288]
δE	sll1865	CDS	unknown protein	Unknown	Unknown	NA	NA	NA	NA	NA	NA	NA
δE/δJ	sll1882	CDS	unknown protein	Cytoplasmic	Unknown	NA	NA	NA	NA	NA	NA	NA
δE	sll1894	CDS	unknown protein	Unknown	Unknown	NA	NA	NA	NA	NA	NA	NA
δE	sll1939	5'UTR	unknown protein	Unknown	Unknown	NA	NA	NA	NA	NA	NA	NA
δE	sll1950	3'UTR	unknown protein	Unknown	Unknown	NA	NA	NA	NA	NA	NA	NA
δE	sll1950	CDS	unknown protein	Unknown	Unknown	NA	NA	NA	NA	NA	NA	NA
δE	sll1959	3'UTR	probable inositol monophosphatase	CytoplasmicMembrane	Unknown	Other	NA	NA	NA	NA	GO:0004437 inositol or phosphatidylinositol phosphatase activity	NA
δE	sll1959	CDS	probable inositol monophosphatase	CytoplasmicMembrane	Unknown	Other	NA	NA	NA	NA	GO:0004437 inositol or phosphatidylinositol phosphatase activity	NA
δE/δJ	sll5002	5'UTR	unknown protein	Unknown	Unknown	NA	NA	NA	NA	NA	NA	NA
δE/δJ	sll5002	CDS	unknown protein	Unknown	Unknown	NA	NA	NA	NA	NA	NA	NA
δJ	sll5006	CDS	unknown protein	Cytoplasmic	Unknown	NA	NA	NA	NA	NA	NA	NA
δE	sll5046	5'UTR	unknown protein	CytoplasmicMembrane	Unknown	NA	NA	NA	NA	sulfur compound metabolic process [GO:0006790]	sulfotransferase activity [GO:0008146]	NA
δE	sll5046	CDS	unknown protein	CytoplasmicMembrane	Unknown	NA	NA	NA	NA	sulfur compound metabolic process [GO:0006790]	sulfotransferase activity [GO:0008146]	NA
δJ	sll5062	5'UTR	unknown protein	Unknown	Unknown	NA	NA	NA	NA	NA	NA	NA
δE	sll5062	CDS	unknown protein	Unknown	Unknown	NA	NA	NA	NA	NA	NA	NA
δE	sll5062	CDS	unknown protein	Unknown	Unknown	NA	NA	NA	NA	NA	NA	NA
δE/δJ	sll5063	CDS	unknown protein	CytoplasmicMembrane	Unknown	NA	NA	NA	NA	NA	NA	NA
δE	sll5069	CDS	unknown protein	Cytoplasmic	Unknown	NA	NA	NA	NA	NA	NA	NA
δE	sll5083	3'UTR	unknown protein	Unknown	Unknown	NA	NA	NA	NA	NA	ATP binding [GO:0005524]	NA
δE	sll5083	CDS	unknown protein	Unknown	Unknown	NA	NA	NA	NA	NA	ATP binding [GO:0005524]	NA
δJ	sll5089	CDS	unknown protein	CytoplasmicMembrane	Unknown	NA	NA	NA	NA	NA	NA	NA
δJ	sll5090	CDS	unknown protein	Cytoplasmic	Unknown	NA	NA	NA	NA	NA	NA	NA
δE	sll7063	CDS	unknown protein	Unknown	Unknown	NA	NA	NA	NA	NA	NA	NA
δJ	sll7078	CDS	unknown protein	Cytoplasmic	Unknown	NA	NA	NA	NA	NA	NA	NA
δE	slr0019	CDS	unknown protein	Unknown	Unknown	NA	NA	NA	NA	NA	transporter activity [GO:0005215]	integral component of membrane [GO:0016021]
δE	slr0061	CDS	unknown protein	Unknown	Unknown	NA	NA	NA	NA	NA	NA	NA
δE	slr0069	CDS	unknown protein	CytoplasmicMembrane	Unknown	NA	NA	NA	NA	NA	NA	integral component of membrane [GO:0016021]
δE	slr0108	CDS	unknown protein	Cytoplasmic	Unknown	NA	NA	NA	NA	NA	NA	NA
δE	slr0109	CDS	unknown protein	CytoplasmicMembrane	Unknown	NA	NA	NA	NA	transmembrane transport [GO:0055085]	NA	integral component of membrane [GO:0016021]
δE	slr0112	3'UTR	unknown protein	Unknown	Unknown	NA	NA	NA	NA	NA	NA	NA
δE	slr0184	5'UTR	unknown protein	Cytoplasmic	Unknown	NA	NA	NA	NA	NA	NA	NA
δE	slr0209	3'UTR	unknown protein	Cytoplasmic	Unknown	NA	NA	NA	NA	NA	NA	NA
δE	slr0209	CDS	unknown protein	Cytoplasmic	Unknown	NA	NA	NA	NA	NA	NA	NA
δE/δJ	slr0271	5'UTR	unknown protein	Unknown	Unknown	NA	NA	NA	NA	NA	NA	NA
δE/δJ	slr0271	CDS	unknown protein	Unknown	Unknown	NA	NA	NA	NA	NA	NA	NA
δJ	slr0272	CDS	unknown protein	Unknown	Unknown	NA	NA	NA	NA	NA	NA	NA
δE	slr0306	5'UTR	unknown protein	Periplasmic	Unknown	NA	NA	NA	NA	nucleotide catabolic process [GO:0009166]	hydrolase activity [GO:0016787]; nucleotide binding [GO:0000166]	NA
δE	slr0377	3'UTR	unknown protein	Cytoplasmic	Unknown	NA	NA	NA	NA	NA	NA	NA
δJ	slr0377	5'UTR	unknown protein	Cytoplasmic	Unknown	NA	NA	NA	NA	NA	NA	NA
δE	slr0377	CDS	unknown protein	Cytoplasmic	Unknown	NA	NA	NA	NA	NA	NA	NA
δE	slr0386	5'UTR	unknown protein	CytoplasmicMembrane	Unknown	NA	NA	NA	NA	NA	hydrolase activity, acting on ester bonds [GO:0016788]	integral component of membrane [GO:0016021]
δE	slr0393	3'UTR	unknown protein	Unknown	Unknown	NA	NA	NA	NA	NA	endonuclease activity [GO:0004519]; nucleic acid binding [GO:0003676]	NA
δJ	slr0408	CDS	unknown protein	Unknown	Unknown	NA	NA	NA	NA	cell communication [GO:0007154]	NA	integral component of membrane [GO:0016021]
δE	slr0421	3'UTR	unknown protein	Unknown	Unknown	NA	NA	NA	NA	NA	NA	NA
δE	slr0442	5'UTR	unknown protein	OuterMembrane	Unknown	NA	NA	NA	NA	NA	NA	integral component of membrane [GO:0016021]
δE	slr0456	3'UTR	unknown protein	Unknown	Unknown	NA	NA	NA	NA	NA	NA	NA
δE	slr0456	CDS	unknown protein	Unknown	Unknown	NA	NA	NA	NA	NA	NA	NA
δE	slr0468	3'UTR	unknown protein	Cytoplasmic	Unknown	NA	NA	NA	NA	NA	NA	NA
δE	slr0496	CDS	unknown protein	Unknown	Unknown	NA	NA	NA	NA	NA	NA	NA
δE	slr0514	CDS	unknown protein	Unknown	Unknown	NA	NA	NA	NA	NA	NA	NA
δE	slr0521	CDS	unknown protein	CytoplasmicMembrane	Unknown	NA	NA	NA	NA	NA	NA	NA
δE	slr0572	5'UTR	unknown protein	Cytoplasmic	Unknown	NA	NA	NA	NA	NA	NA	NA
δE	slr0572	CDS	unknown protein	Cytoplasmic	Unknown	NA	NA	NA	NA	NA	NA	NA
δE	slr0616	3'UTR	unknown protein	CytoplasmicMembrane	Unknown	NA	NA	NA	NA	transmembrane transport [GO:0055085]	transporter activity [GO:0005215]	integral component of membrane [GO:0016021]
δE	slr0616	5'UTR	unknown protein	CytoplasmicMembrane	Unknown	NA	NA	NA	NA	transmembrane transport [GO:0055085]	transporter activity [GO:0005215]	integral component of membrane [GO:0016021]
δE	slr0654	5'UTR	unknown protein	Unknown	Unknown	NA	NA	NA	NA	NA	NA	NA
δE	slr0702	CDS	unknown protein	Unknown	Unknown	NA	NA	NA	NA	NA	NA	NA
δJ	slr0708	5'UTR	periplasmic protein, function unknown	CytoplasmicMembrane	Unknown	NA	NA	NA	NA	NA	NA	integral component of membrane [GO:0016021]; outer membrane-bounded periplasmic space [GO:0030288]
δE/δJ	slr0708	3'UTR	periplasmic protein, function unknown	CytoplasmicMembrane	Unknown	NA	NA	NA	NA	NA	NA	integral component of membrane [GO:0016021]; outer membrane-bounded periplasmic space [GO:0030288]
δE/δJ	slr0708	CDS	periplasmic protein, function unknown	CytoplasmicMembrane	Unknown	NA	NA	NA	NA	NA	NA	integral component of membrane [GO:0016021]; outer membrane-bounded periplasmic space [GO:0030288]
δE	slr0727	3'UTR	unknown protein	Cytoplasmic	Unknown	NA	NA	NA	NA	NA	NA	NA
δE	slr0727	CDS	unknown protein	Cytoplasmic	Unknown	NA	NA	NA	NA	NA	NA	NA
δE	slr0867	CDS	unknown protein	Unknown	Unknown	NA	NA	NA	NA	NA	NA	NA
δE	slr0880	CDS	similar to fibronectin binding protein	CytoplasmicMembrane	Unknown	Other	NA	NA	NA	NA	NA	NA
δE	slr0881	3'UTR	unknown protein	Unknown	Unknown	NA	NA	NA	NA	NA	NA	NA
δE	slr0960	CDS	unknown protein	CytoplasmicMembrane	Unknown	NA	NA	NA	NA	NA	NA	integral component of membrane [GO:0016021]
δE	slr0962	3'UTR	unknown protein	CytoplasmicMembrane	Unknown	NA	NA	NA	NA	NA	NA	integral component of membrane [GO:0016021]
δE	slr0962	5'UTR	unknown protein	CytoplasmicMembrane	Unknown	NA	NA	NA	NA	NA	NA	integral component of membrane [GO:0016021]
δJ	slr1028	5'UTR	unknown protein	Unknown	Unknown	NA	NA	NA	NA	cell adhesion [GO:0007155]; cell communication [GO:0007154]	NA	integrin complex [GO:0008305]
δJ	slr1028	CDS	unknown protein	Unknown	Unknown	NA	NA	NA	NA	cell adhesion [GO:0007155]; cell communication [GO:0007154]	NA	integrin complex [GO:0008305]
δE	slr1127	CDS	unknown protein	Unknown	Unknown	NA	NA	NA	NA	NA	NA	NA
δE	slr1148	CDS	unknown protein	Cytoplasmic	Unknown	NA	NA	NA	NA	NA	NA	NA
δE	slr1189	3'UTR	unknown protein	Cytoplasmic	Unknown	NA	NA	NA	NA	NA	NA	NA
δE	slr1222	3'UTR	unknown protein	Unknown	Unknown	NA	NA	NA	NA	NA	NA	NA
δE	slr1222	CDS	unknown protein	Unknown	Unknown	NA	NA	NA	NA	NA	NA	NA
δE	slr1243	5'UTR	unknown protein	Cytoplasmic	Unknown	NA	NA	NA	NA	NA	ATP binding [GO:0005524]	NA
δE	slr1385	5'UTR	unknown protein	Unknown	Unknown	NA	NA	NA	NA	regulation of transcription, DNA-templated [GO:0006355]	NA	NA
δE	slr1385	CDS	unknown protein	Unknown	Unknown	NA	NA	NA	NA	regulation of transcription, DNA-templated [GO:0006355]	NA	NA
δE	slr1391	3'UTR	unknown protein	CytoplasmicMembrane	Unknown	NA	NA	NA	NA	NA	NA	NA
δE	slr1397	CDS	unknown protein	Cytoplasmic	Unknown	NA	NA	NA	NA	NA	NA	NA
δE	slr1398	3'UTR	unknown protein	Unknown	Unknown	NA	NA	NA	NA	NA	NA	NA
δE	slr1398	5'UTR	unknown protein	Unknown	Unknown	NA	NA	NA	NA	NA	NA	NA
δE	slr1398	CDS	unknown protein	Unknown	Unknown	NA	NA	NA	NA	NA	NA	NA
δE	slr1403	5'UTR	unknown protein	Extracellular	Unknown	NA	NA	NA	NA	cell adhesion [GO:0007155]; cell communication [GO:0007154]; GPI anchor release [GO:0006507]	glycosylphosphatidylinositol phospholipase D activity [GO:0004621]	extracellular space [GO:0005615]; integrin complex [GO:0008305]
δE	slr1403	CDS	unknown protein	Extracellular	Unknown	NA	NA	NA	NA	cell adhesion [GO:0007155]; cell communication [GO:0007154]; GPI anchor release [GO:0006507]	glycosylphosphatidylinositol phospholipase D activity [GO:0004621]	extracellular space [GO:0005615]; integrin complex [GO:0008305]
δE	slr1436	CDS	unknown protein	Cytoplasmic	Unknown	NA	NA	NA	NA	methylation [GO:0032259]	S-adenosylmethionine-dependent methyltransferase activity [GO:0008757]	NA
δE	slr1456	5'UTR	type 4 pilin-like protein, or general secretion pathway protein G	CytoplasmicMembrane	Unknown	NA	NA	NA	NA	GO:0015628 protein secretion by the type II secretion system	GO:0008565 protein transporter activity	GO:0015627 type II protein secretion system complex
δE	slr1456	CDS	type 4 pilin-like protein, or general secretion pathway protein G	CytoplasmicMembrane	Unknown	NA	NA	NA	NA	GO:0015628 protein secretion by the type II secretion system	GO:0008565 protein transporter activity	GO:0015627 type II protein secretion system complex
δE	slr1484	5'UTR	unknown protein	Unknown	Unknown	NA	NA	NA	NA	GO:0015031 protein transport	GO:0008565 protein transporter activity	GO:0016020 membrane GO:0030288 outer membrane-bounded periplasmic space
δE	slr1484	CDS	unknown protein	Unknown	Unknown	NA	NA	NA	NA	GO:0015031 protein transport	GO:0008565 protein transporter activity	GO:0016020 membrane GO:0030288 outer membrane-bounded periplasmic space
δE	slr1485	CDS	putative phosphatidylinositol phosphate kinase, salt-induced periplasmic protein	Extracellular	Unknown	NA	NA	NA	NA	NA	NA	outer membrane-bounded periplasmic space [GO:0030288]
δE	slr1544	3'UTR	unknown protein	Unknown	Unknown	NA	NA	NA	NA	NA	NA	integral component of membrane [GO:0016021]
δE	slr1544	CDS	unknown protein	Unknown	Unknown	NA	NA	NA	NA	NA	NA	NA
δE	slr1576	5'UTR	unknown protein	Unknown	Unknown	NA	NA	NA	NA	NA	NA	NA
δE	slr1636	3'UTR	unknown protein	Cytoplasmic	Unknown	NA	NA	NA	NA	NA	NA	NA
δE	slr1667	5'UTR	hypothetical protein (target gene of sycrp1)	Unknown	Unknown	NA	NA	NA	NA	NA	NA	NA
δE	slr1670	CDS	unknown protein	Cytoplasmic	Unknown	NA	NA	NA	NA	carbohydrate metabolic process [GO:0005975]	NA	NA
δJ	slr1788	CDS	unknown protein	Cytoplasmic	Unknown	NA	NA	NA	NA	NA	NA	NA
δJ	slr1789	CDS	unknown protein	Cytoplasmic	Unknown	NA	NA	NA	NA	NA	NA	NA
δE	slr1809	3'UTR	unknown protein	Cytoplasmic	Unknown	NA	NA	NA	NA	NA	NA	integral component of membrane [GO:0016021]
δE	slr1854	CDS	periplasmic protein, function unknown	Cytoplasmic	Unknown	NA	NA	NA	NA	carbohydrate metabolic process [GO:0005975]	hydrolase activity, acting on carbon-nitrogen (but not peptide) bonds [GO:0016810]	outer membrane-bounded periplasmic space [GO:0030288]
δE	slr1855	CDS	periplasmic protein, function unknown	Unknown	Unknown	NA	NA	NA	NA	NA	NA	outer membrane-bounded periplasmic space [GO:0030288]
δE	slr1856	CDS	periplasmic protein, function unknown	Unknown	Unknown	NA	NA	NA	NA	NA	metal ion binding [GO:0046872]	outer membrane-bounded periplasmic space [GO:0030288]
δJ	slr1920	3'UTR	unknown protein	Cytoplasmic	Unknown	NA	NA	NA	NA	NA	NA	NA
δJ	slr1920	CDS	unknown protein	Cytoplasmic	Unknown	NA	NA	NA	NA	NA	NA	NA
δE	slr1932	3'UTR	unknown protein	Unknown	Unknown	NA	NA	NA	NA	NA	hydrolase activity [GO:0016787]	NA
δJ	slr1958	3'UTR	unknown protein	Unknown	Unknown	NA	NA	NA	NA	NA	NA	NA
δE	slr1958	5'UTR	unknown protein	Unknown	Unknown	NA	NA	NA	NA	NA	NA	NA
δJ	slr2017	CDS	type 4 pilin-like protein, essential for motility	Unknown	Unknown	NA	NA	NA	NA	NA	NA	integral component of membrane [GO:0016021]
δE	slr2027	CDS	unknown protein	CytoplasmicMembrane	Unknown	NA	NA	NA	NA	NA	NA	integral component of membrane [GO:0016021]
δE	slr2027	5'UTR	unknown protein	CytoplasmicMembrane	Unknown	NA	NA	NA	NA	NA	NA	integral component of membrane [GO:0016021]
δE	slr2037	CDS	unknown protein	Cytoplasmic	Unknown	NA	NA	NA	NA	NA	NA	NA
δE	slr5013	CDS	unknown protein	Cytoplasmic	Unknown	NA	NA	NA	NA	NA	NA	NA
δE	slr5016	CDS	unknown protein	Cytoplasmic	Unknown	NA	NA	NA	NA	NA	GO:0003677 DNA binding GO:0043565 sequence-specific DNA binding	NA
δE	slr5053	CDS	unknown protein	Unknown	Unknown	NA	NA	NA	NA	NA	NA	NA
δE	slr5053	5'UTR	unknown protein	Unknown	Unknown	NA	NA	NA	NA	NA	NA	NA
δE	slr5071	CDS	unknown protein	Unknown	Unknown	NA	NA	NA	NA	NA	DNA binding [GO:0003677]	NA
δE	slr5073	CDS	unknown protein	Cytoplasmic	Unknown	NA	NA	NA	NA	NA	NA	NA
δE	slr5073	5'UTR	unknown protein	Cytoplasmic	Unknown	NA	NA	NA	NA	NA	NA	NA
δE	slr5110	5'UTR	unknown protein	Unknown	Unknown	NA	NA	NA	NA	NA	DNA binding [GO:0003677]	NA
δJ	slr5111	5'UTR	unknown protein	Unknown	Unknown	NA	NA	NA	NA	NA	NA	NA
δE/δJ	slr5112	CDS	unknown protein	Cytoplasmic	Unknown	NA	NA	NA	NA	NA	NA	NA
δE	slr5127	CDS	unknown protein	Unknown	Unknown	NA	NA	NA	NA	NA	NA	integral component of membrane [GO:0016021]
δE	slr5127	3'UTR	unknown protein	Unknown	Unknown	NA	NA	NA	NA	NA	NA	integral component of membrane [GO:0016021]
δJ	slr6063	CDS	unknown protein	Cytoplasmic	Unknown	NA	NA	NA	NA	NA	NA	NA
δJ	slr7080	CDS	unknown protein	Unknown	Unknown	NA	NA	NA	NA	NA	NA	NA
δJ	slr7081	CDS	unknown protein	Cytoplasmic	Unknown	NA	NA	NA	NA	NA	NA	NA
δJ	slr7082	CDS	unknown protein	Cytoplasmic	Unknown	NA	NA	NA	NA	NA	NA	NA
δJ	slr7083	CDS	unknown protein	Cytoplasmic	Unknown	NA	NA	NA	NA	NA	NA	NA
δJ	slr7098	CDS	unknown protein	Unknown	Unknown	NA	NA	NA	NA	NA	NA	NA
δJ	slr7099	CDS	unknown protein	CytoplasmicMembrane	Unknown	NA	NA	NA	NA	NA	NA	NA
δJ	slr7100	CDS	unknown protein	CytoplasmicMembrane	Unknown	NA	NA	NA	NA	NA	NA	integral component of membrane [GO:0016021]
δJ	slr7100	5'UTR	unknown protein	CytoplasmicMembrane	Unknown	NA	NA	NA	NA	NA	NA	integral component of membrane [GO:0016021]
δJ	slr7101	CDS	unknown protein	Cytoplasmic	Unknown	NA	NA	NA	NA	NA	NA	NA
δE	ssl0750	CDS	unknown protein	Unknown	Unknown	NA	NA	NA	NA	NA	NA	NA
δE	ssl0750	5'UTR	unknown protein	Unknown	Unknown	NA	NA	NA	NA	NA	NA	NA
δJ	ssl1520	CDS	unknown protein	CytoplasmicMembrane	Unknown	NA	NA	NA	NA	NA	NA	integral component of membrane [GO:0016021]
δE	ssl2065	3'UTR	unknown protein	Unknown	Unknown	NA	NA	NA	NA	NA	NA	NA
δE	ssl2162	CDS	unknown protein	CytoplasmicMembrane	Unknown	NA	NA	NA	NA	NA	NA	integral component of membrane [GO:0016021]
δE	ssl2162	3'UTR	unknown protein	CytoplasmicMembrane	Unknown	NA	NA	NA	NA	NA	NA	integral component of membrane [GO:0016021]
δE	ssl3615	5'UTR	unknown protein	Cytoplasmic	Unknown	NA	NA	NA	NA	NA	NA	NA
δE	ssl3769	CDS	unknown protein	CytoplasmicMembrane	Unknown	NA	NA	NA	NA	NA	NA	integral component of membrane [GO:0016021]
δE	ssl3769	3'UTR	unknown protein	CytoplasmicMembrane	Unknown	NA	NA	NA	NA	NA	NA	integral component of membrane [GO:0016021]
δE	ssl3769	5'UTR	unknown protein	CytoplasmicMembrane	Unknown	NA	NA	NA	NA	NA	NA	integral component of membrane [GO:0016021]
δE	ssl5007	CDS	unknown protein	Unknown	Unknown	NA	NA	NA	NA	NA	NA	NA
δE	ssl5039	3'UTR	unknown protein	Unknown	Unknown	NA	NA	NA	NA	NA	NA	NA
δE	ssl5065	CDS	unknown protein	Unknown	Unknown	NA	NA	NA	NA	regulation of transcription, DNA-templated [GO:0006355]	NA	NA
δE	ssl5098	5'UTR	unknown protein	Unknown	Unknown	NA	NA	NA	NA	NA	NA	NA
δE	ssl5114	5'UTR	unknown protein	Unknown	Unknown	NA	NA	NA	NA	NA	NA	integral component of membrane [GO:0016021]
δE	ssl5125	CDS	unknown protein	Unknown	Unknown	NA	NA	NA	NA	NA	NA	NA
δE	ssr0390	CDS	unknown protein	Cytoplasmic	Unknown	NA	NA	NA	NA	NA	NA	NA
δE	ssr0759	CDS	unknown protein	Unknown	Unknown	NA	NA	NA	NA	NA	NA	integral component of membrane [GO:0016021]
δE	ssr1038	CDS	unknown protein	Unknown	Unknown	NA	NA	NA	NA	NA	NA	NA
δE	ssr1038	3'UTR	unknown protein	Unknown	Unknown	NA	NA	NA	NA	NA	NA	NA
δE	ssr1038	5'UTR	unknown protein	Unknown	Unknown	NA	NA	NA	NA	NA	NA	NA
δE	ssr2062	5'UTR	unknown protein	Cytoplasmic	Unknown	NA	NA	NA	NA	NA	catalytic activity [GO:0003824]	NA
δJ	ssr2153	5'UTR	unknown protein	Unknown	Unknown	NA	NA	NA	NA	NA	NA	integral component of membrane [GO:0016021]
δE	ssr2201	5'UTR	unknown protein	Unknown	Unknown	NA	NA	NA	NA	NA	NA	NA
δE	ssr2317	CDS	unknown protein	Unknown	Unknown	NA	NA	NA	NA	NA	NA	NA
δE	ssr2318	CDS	unknown protein	CytoplasmicMembrane	Unknown	NA	NA	NA	NA	NA	NA	integral component of membrane [GO:0016021]
δE	ssr2318	3'UTR	unknown protein	CytoplasmicMembrane	Unknown	NA	NA	NA	NA	NA	NA	integral component of membrane [GO:0016021]
δE	ssr2333	CDS	unknown protein	Unknown	Unknown	NA	NA	NA	NA	NA	transition metal ion binding [GO:0046914]	NA
δE	ssr2333	5'UTR	unknown protein	Unknown	Unknown	NA	NA	NA	NA	NA	transition metal ion binding [GO:0046914]	NA
δE	ssr2422	3'UTR	unknown protein	Unknown	Unknown	NA	NA	NA	NA	NA	NA	integral component of membrane [GO:0016021]; thylakoid membrane [GO:0042651]
δE	ssr2848	CDS	unknown protein	Unknown	Unknown	NA	NA	NA	NA	NA	NA	NA
δE	ssr2848	3'UTR	unknown protein	Unknown	Unknown	NA	NA	NA	NA	NA	NA	NA
δE	ssr2848	5'UTR	unknown protein	Unknown	Unknown	NA	NA	NA	NA	NA	NA	NA
δE	ssr2912	CDS	unknown protein	CytoplasmicMembrane	Unknown	NA	NA	NA	NA	regulation of ATPase activity [GO:0043462]	potassium-transporting ATPase activity [GO:0008556]	integral component of membrane [GO:0016021]; plasma membrane [GO:0005886]
δE	ssr3300	CDS	unknown protein	CytoplasmicMembrane	Unknown	NA	NA	NA	NA	NA	NA	NA
δE	ssr3465	CDS	unknown protein	CytoplasmicMembrane	Unknown	NA	NA	NA	NA	NA	NA	NA
δE	ssr3465	5'UTR	unknown protein	CytoplasmicMembrane	Unknown	NA	NA	NA	NA	NA	NA	NA
δE	ssr3570	CDS	unknown protein	Unknown	Unknown	NA	NA	NA	NA	NA	NA	NA
δE	ssr5074	CDS	unknown protein	CytoplasmicMembrane	Unknown	NA	NA	NA	NA	NA	NA	integral component of membrane [GO:0016021]
δE	ssr5074	5'UTR	unknown protein	CytoplasmicMembrane	Unknown	NA	NA	NA	NA	NA	NA	integral component of membrane [GO:0016021]
